# Supplementary material for: Bioactive O^N^O^ Schiff base appended homoleptic titanium( iv ) complexes: DFT, BSA/CT-DNA interactions, molecular docking and antitumor activity against HeLa and A549 cell lines
Source: Royal Society of Chemistry journal article supplement (doi:10.1039/d3ra08574k), 2024-01-01
Supplement: d3ra08574k1.pdf [file d3ra08574k1.pdf]

## Supplementary Information

### Bioactive O<sup>N</sup>O<sup>A</sup> Schiff base appended homoleptic titanium(IV) complexes: DFT, BSA/CT-DNA interactions, molecular docking and antitumor activity against HeLa and A549 cell lines

Sathish Thanigachalam and Madhvesh Pathak\*

Department of Chemistry, School of Advanced Sciences, Vellore Institute of Technology,  
Vellore - 632014, Tamil Nadu, India

\*Email of corresponding author: [madhveshpathak@vit.ac.in](mailto:madhveshpathak@vit.ac.in)

| S. No           | Contents                                                                                                                                                                                                                                                                                    |
|-----------------|---------------------------------------------------------------------------------------------------------------------------------------------------------------------------------------------------------------------------------------------------------------------------------------------|
|                 | <b>Ligand derivatives (H<sub>2</sub>L<sup>1</sup>-H<sub>2</sub>L<sup>5</sup>)</b>                                                                                                                                                                                                           |
| <b>Fig. S1</b>  | NMR Spectra of ligand H <sub>2</sub> L <sup>1</sup> : <b>(a)</b> <sup>1</sup> H NMR spectrum, <b>(b)</b> <sup>1</sup> H NMR expansion spectrum and <b>(c)</b> <sup>13</sup> C NMR spectrum                                                                                                  |
| <b>Fig. S2</b>  | NMR Spectra of ligand H <sub>2</sub> L <sup>2</sup> : <b>(a)</b> <sup>1</sup> H NMR spectrum, <b>(b)</b> <sup>1</sup> H NMR expansion spectrum and <b>(c)</b> <sup>13</sup> C NMR spectrum                                                                                                  |
| <b>Fig. S3</b>  | NMR Spectra of ligand H <sub>2</sub> L <sup>3</sup> : <b>(a)</b> <sup>1</sup> H NMR spectrum, <b>(b)</b> <sup>1</sup> H NMR expansion spectrum and <b>(c)</b> <sup>13</sup> C NMR spectrum                                                                                                  |
| <b>Fig. S4</b>  | NMR Spectra of ligand H <sub>2</sub> L <sup>4</sup> : <b>(a)</b> <sup>1</sup> H NMR spectrum, <b>(b)</b> <sup>1</sup> H NMR expansion spectrum and <b>(c)</b> <sup>13</sup> C NMR spectrum                                                                                                  |
| <b>Fig. S5</b>  | NMR Spectra of ligand H <sub>2</sub> L <sup>5</sup> : <b>(a)</b> <sup>1</sup> H NMR spectrum, <b>(b)</b> <sup>1</sup> H NMR expansion spectrum and <b>(c)</b> <sup>13</sup> C NMR spectrum                                                                                                  |
| <b>Fig. S6</b>  | FTIR Spectra of ligands: <b>(a)</b> H <sub>2</sub> L <sup>1</sup> , <b>(b)</b> H <sub>2</sub> L <sup>2</sup> , <b>(c)</b> H <sub>2</sub> L <sup>3</sup> , <b>(d)</b> H <sub>2</sub> L <sup>4</sup> and <b>(e)</b> H <sub>2</sub> L <sup>5</sup>                                             |
|                 | <b>Titanium(IV) complexes (TiH<sub>2</sub>L<sup>1</sup>-TiH<sub>2</sub>L<sup>5</sup>)</b>                                                                                                                                                                                                   |
| <b>Fig. S7</b>  | NMR Spectra of TiH <sub>2</sub> L <sup>1</sup> : <b>(a)</b> <sup>1</sup> H NMR spectrum, <b>(b)</b> <sup>1</sup> H NMR expansion spectrum and <b>(c)</b> <sup>13</sup> C NMR spectrum                                                                                                       |
| <b>Fig. S8</b>  | NMR Spectra of TiH <sub>2</sub> L <sup>2</sup> : <b>(a)</b> <sup>1</sup> H NMR spectrum, <b>(b)</b> <sup>1</sup> H NMR expansion spectrum and <b>(c)</b> <sup>13</sup> C NMR spectrum                                                                                                       |
| <b>Fig. S9</b>  | NMR Spectra of TiH <sub>2</sub> L <sup>3</sup> : <b>(a)</b> <sup>1</sup> H NMR spectrum, <b>(b)</b> <sup>1</sup> H NMR expansion spectrum and <b>(c)</b> <sup>13</sup> C NMR spectrum                                                                                                       |
| <b>Fig. S10</b> | NMR Spectra of TiH <sub>2</sub> L <sup>4</sup> : <b>(a)</b> <sup>1</sup> H NMR spectrum, <b>(b)</b> <sup>1</sup> H NMR expansion spectrum and <b>(c)</b> <sup>13</sup> C NMR spectrum                                                                                                       |
| <b>Fig. S11</b> | NMR Spectra of TiH <sub>2</sub> L <sup>5</sup> : <b>(a)</b> <sup>1</sup> H NMR spectrum, <b>(b)</b> <sup>1</sup> H NMR expansion spectrum and <b>(c)</b> <sup>13</sup> C NMR spectrum                                                                                                       |
| <b>Fig. S12</b> | FTIR Spectra of titanium(IV) complexes: <b>(a)</b> TiH <sub>2</sub> L <sup>1</sup> , <b>(b)</b> TiH <sub>2</sub> L <sup>2</sup> , <b>(c)</b> TiH <sub>2</sub> L <sup>3</sup> , <b>(d)</b> TiH <sub>2</sub> L <sup>4</sup> and <b>(e)</b> TiH <sub>2</sub> L <sup>5</sup>                    |
| <b>Fig. S13</b> | HRMS of titanium(IV) complexes: <b>(a)</b> TiH <sub>2</sub> L <sup>1</sup> , <b>(b)</b> TiH <sub>2</sub> L <sup>2</sup> , <b>(c)</b> TiH <sub>2</sub> L <sup>3</sup> , <b>(d)</b> TiH <sub>2</sub> L <sup>4</sup> and <b>(e)</b> TiH <sub>2</sub> L <sup>5</sup>                            |
|                 | <b>Photo-physical studies</b>                                                                                                                                                                                                                                                               |
| <b>Fig. S14</b> | UV-Visible spectra: (a) ligands H <sub>2</sub> L <sup>1</sup> -H <sub>2</sub> L <sup>5</sup> and (b) TiH <sub>2</sub> L <sup>1</sup> -TiH <sub>2</sub> L <sup>5</sup>                                                                                                                       |
| <b>Fig. S15</b> | UV-Visible stability spectra in 10% DMSO: <b>(a)</b> TiH <sub>2</sub> L <sup>1</sup> , <b>(b)</b> TiH <sub>2</sub> L <sup>2</sup> , <b>(c)</b> TiH <sub>2</sub> L <sup>3</sup> , <b>(d)</b> TiH <sub>2</sub> L <sup>4</sup> and <b>(e)</b> TiH <sub>2</sub> L <sup>5</sup>                  |
| <b>Fig. S16</b> | Stability studies of titanium(IV) complexes: <b>(a)</b> TiH <sub>2</sub> L <sup>1</sup> , <b>(b)</b> TiH <sub>2</sub> L <sup>2</sup> , <b>(c)</b> TiH <sub>2</sub> L <sup>3</sup> , <b>(d)</b> TiH <sub>2</sub> L <sup>4</sup> and <b>(e)</b> TiH <sub>2</sub> L <sup>5</sup> in GSH medium |

|                 |                                                                                                                                                                                                                                                     |
|-----------------|-----------------------------------------------------------------------------------------------------------------------------------------------------------------------------------------------------------------------------------------------------|
| <b>Fig. S17</b> | UV-Visible studies of titanium(IV) complexes: <b>(a)</b> $TiH_2L^1$ , <b>(b)</b> $TiH_2L^2$ , <b>(c)</b> $TiH_2L^3$ , <b>(d)</b> $TiH_2L^4$ and <b>(e)</b> $TiH_2L^5$ in water and octanol                                                          |
|                 | <b>DFT</b>                                                                                                                                                                                                                                          |
| <b>Fig. S18</b> | Optimized molecular geometry of free ligands ( $H_2L^1-H_2L^5$ ) by using the DFT/B3LYP method                                                                                                                                                      |
| <b>Fig. S19</b> | Optimized molecular geometry of $TiH_2L^1-TiH_2L^5$ by DFT/B3LYP method                                                                                                                                                                             |
| <b>Fig. S20</b> | Electrostatic potential mapped on the surface of optimized molecular geometries of free ligands by DFT/B3LYP method                                                                                                                                 |
| <b>Fig. S21</b> | FMOs of free ligand ( $H_2L^1-TiH_2L^5$ ) by using DFT/B3LYP method                                                                                                                                                                                 |
| <b>Fig. S22</b> | TD-DFT spectra: <b>(a)</b> $H_2L^1-H_2L^5$ for ligands and <b>(b)</b> $TiH_2L^1-TiH_2L^5$ in aqueous phase                                                                                                                                          |
|                 | <b>CT-DNA interaction</b>                                                                                                                                                                                                                           |
| <b>Fig. S23</b> | DNA binding plots of all the five titanium(IV) derivatives: <b>(a)</b> $TiH_2L^1$ , <b>(b)</b> $TiH_2L^2$ , <b>(c)</b> $TiH_2L^3$ , <b>(d)</b> $TiH_2L^4$ and <b>(e)</b> $TiH_2L^5$                                                                 |
| <b>Fig. S24</b> | $\{[DNA]/(\epsilon_a-\epsilon_f)\}$ vs $[DNA]$ linear plots of all the five complexes: <b>(a)</b> $TiH_2L^1$ , <b>(b)</b> $TiH_2L^2$ , <b>(c)</b> $TiH_2L^3$ , <b>(d)</b> $TiH_2L^4$ and <b>(e)</b> $TiH_2L^5$                                      |
| <b>Fig. S25</b> | Fluorescence quenching of EtBr-DNA with titanium(IV) complexes: <b>(a)</b> $TiH_2L^1$ , <b>(b)</b> $TiH_2L^2$ , <b>(c)</b> $TiH_2L^3$ , <b>(d)</b> $TiH_2L^4$ and <b>(e)</b> $TiH_2L^5$                                                             |
| <b>Fig. S26</b> | CT-DNA intercalation Stern-Volmer plot of $I_0/I$ vs concentration of titanium(IV) complexes: <b>(a)</b> $TiH_2L^1$ , <b>(b)</b> $TiH_2L^2$ , <b>(c)</b> $TiH_2L^3$ , <b>(d)</b> $TiH_2L^4$ and <b>(e)</b> $TiH_2L^5$                               |
| <b>Fig. S27</b> | Scatchard plot of $\log([I_0-I]/I)$ vs $\log[\text{complex}]$ for CT-DNA with presence of titanium(IV) derivatives: <b>(a)</b> $TiH_2L^1$ , <b>(b)</b> $TiH_2L^2$ , <b>(c)</b> $TiH_2L^3$ , <b>(d)</b> $TiH_2L^4$ and <b>(e)</b> $TiH_2L^5$         |
| <b>Fig. S28</b> | Relative viscosity of CT-DNA interaction with EtBr and titanium(IV) derivatives ( $TiH_2L^1-TiH_2L^5$ )                                                                                                                                             |
|                 | <b>BSA interaction</b>                                                                                                                                                                                                                              |
| <b>Fig. S29</b> | BSA binding plots of all the five titanium(IV) derivatives: <b>(a)</b> $TiH_2L^1$ , <b>(b)</b> $TiH_2L^2$ , <b>(c)</b> $TiH_2L^3$ , <b>(d)</b> $TiH_2L^4$ and <b>(e)</b> $TiH_2L^5$                                                                 |
| <b>Fig. S30</b> | Fluorescence quenching plot for BSA of all the five titanium(IV) derivatives: <b>(a)</b> $TiH_2L^1$ , <b>(b)</b> $TiH_2L^2$ , <b>(c)</b> $TiH_2L^3$ , <b>(d)</b> $TiH_2L^4$ and <b>(e)</b> $TiH_2L^5$                                               |
| <b>Fig. S31</b> | Stern-Volmer plot of $I_0/I$ vs concentration of complexes: <b>(a)</b> $TiH_2L^1$ , <b>(b)</b> $TiH_2L^2$ , <b>(c)</b> $TiH_2L^3$ , <b>(d)</b> $TiH_2L^4$ and <b>(e)</b> $TiH_2L^5$ for BSA binding                                                 |
| <b>Fig. S32</b> | Scatchard plot of $\log([I_0-I]/I)$ vs $\log[\text{Complex}]$ for BSA in the presence of titanium(IV) derivatives: <b>(a)</b> $TiH_2L^1$ , <b>(b)</b> $TiH_2L^2$ , <b>(c)</b> $TiH_2L^3$ , <b>(d)</b> $TiH_2L^4$ and <b>(e)</b> $TiH_2L^5$          |
| <b>Fig. S33</b> | Anti-inflammatory activity of $TiH_2L^1-TiH_2L^5$                                                                                                                                                                                                   |
| <b>Fig. S34</b> | Microscopic images (a-h) of HeLa and A549 cells treated with titanium(IV) derivatives ( $TiH_2L^2-TiH_2L^4$ ) in 100 $\mu\text{g}/\text{mL}$ concentration (dead cells are revealed as red circles and live cells are demonstrated as blue circles) |
|                 | <b>Table</b>                                                                                                                                                                                                                                        |
| <b>Table S1</b> | FTIR spectral data ( $\text{cm}^{-1}$ ) of $TiH_2L^1-TiH_2L^5$                                                                                                                                                                                      |
| <b>Table S2</b> | Calculated molecular electronic parameters of ligands ( $H_2L^1-H_2L^5$ ) and titanium(IV) derivatives ( $TiH_2L^1-TiH_2L^5$ )                                                                                                                      |
| <b>Table S3</b> | Optimized bond length of Ti(IV) complexes                                                                                                                                                                                                           |
| <b>Table S4</b> | Optimized bond angle of the Ti(IV) derivatives                                                                                                                                                                                                      |
| <b>Table S5</b> | Chemical shifts (ppm): protons of the $TiH_2L^3$ and CT-DNA bound with $TiH_2L^3$ in the system                                                                                                                                                     |

|                 |                                                                                                                                                      |
|-----------------|------------------------------------------------------------------------------------------------------------------------------------------------------|
| <b>Table S6</b> | Molecular docking studies of titanium(IV) derivatives ( <b>TiH<sub>2</sub>L<sup>1</sup></b> - <b>TiH<sub>2</sub>L<sup>5</sup></b> ) with DNA and BSA |
| <b>Table S7</b> | A glance on cytotoxicity comparison of titanium(IV) derivatives                                                                                      |
|                 | Experimental Procedures                                                                                                                              |
|                 | References                                                                                                                                           |

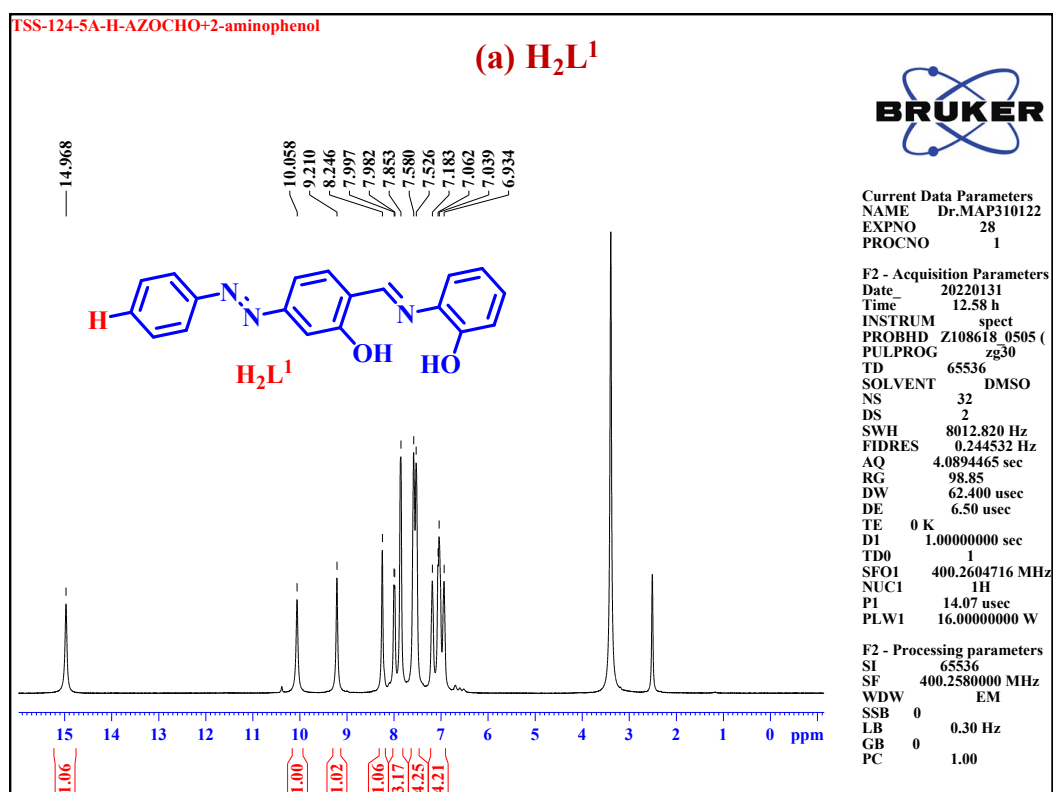

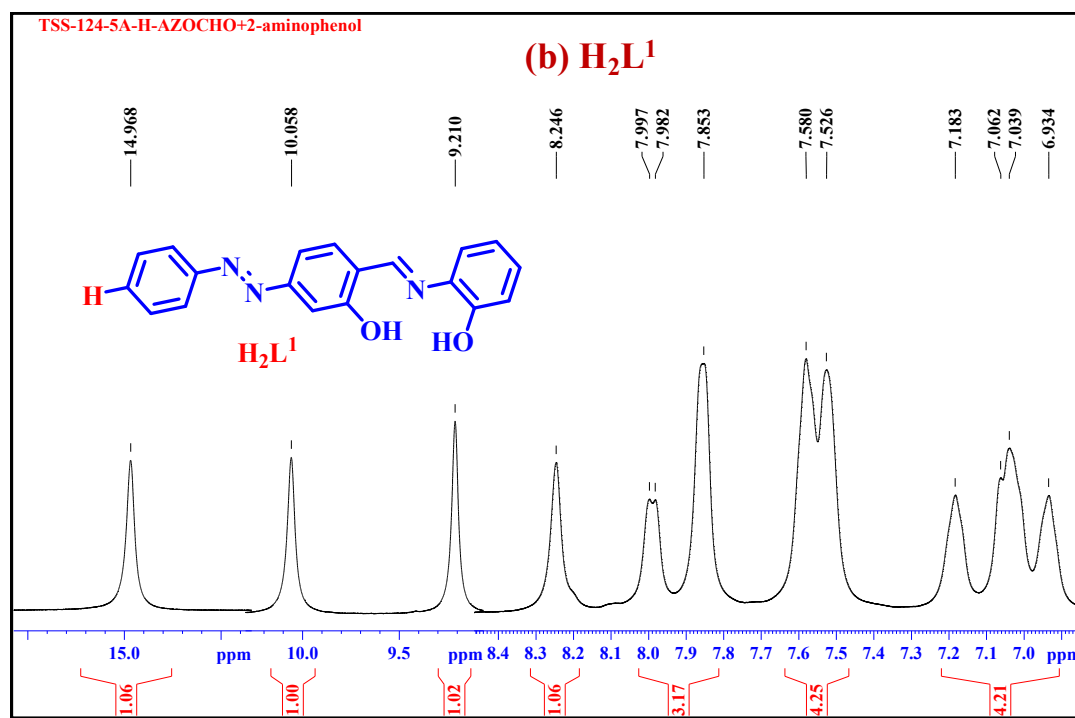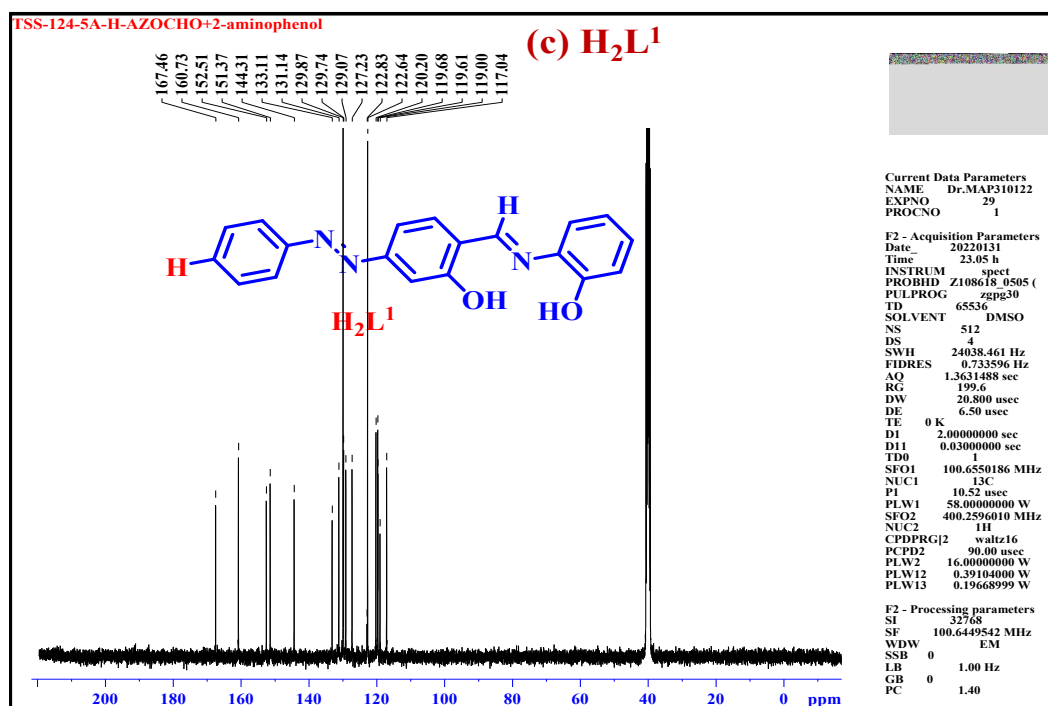

Fig. S1 NMR Spectrum of ligand  $H_2L^1$ : (a)  $^1H$  NMR spectrum, (b)  $^1H$  NMR expansion spectrum and (c)  $^{13}C$  NMR spectrum

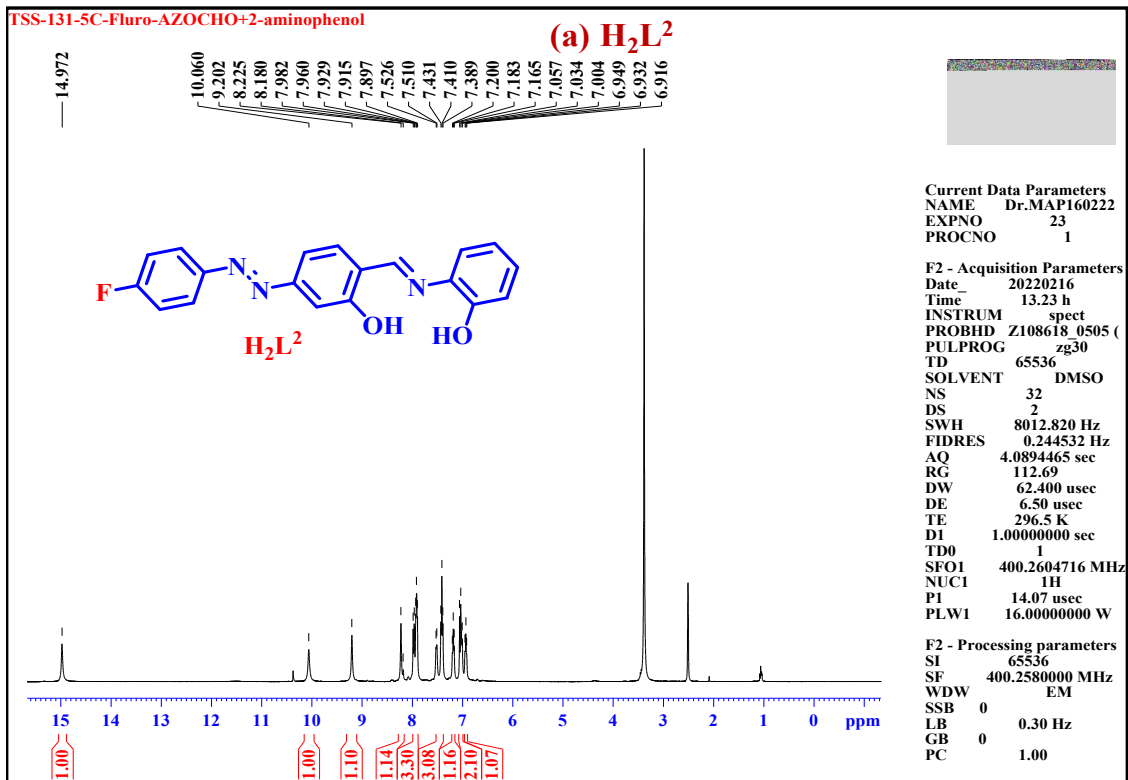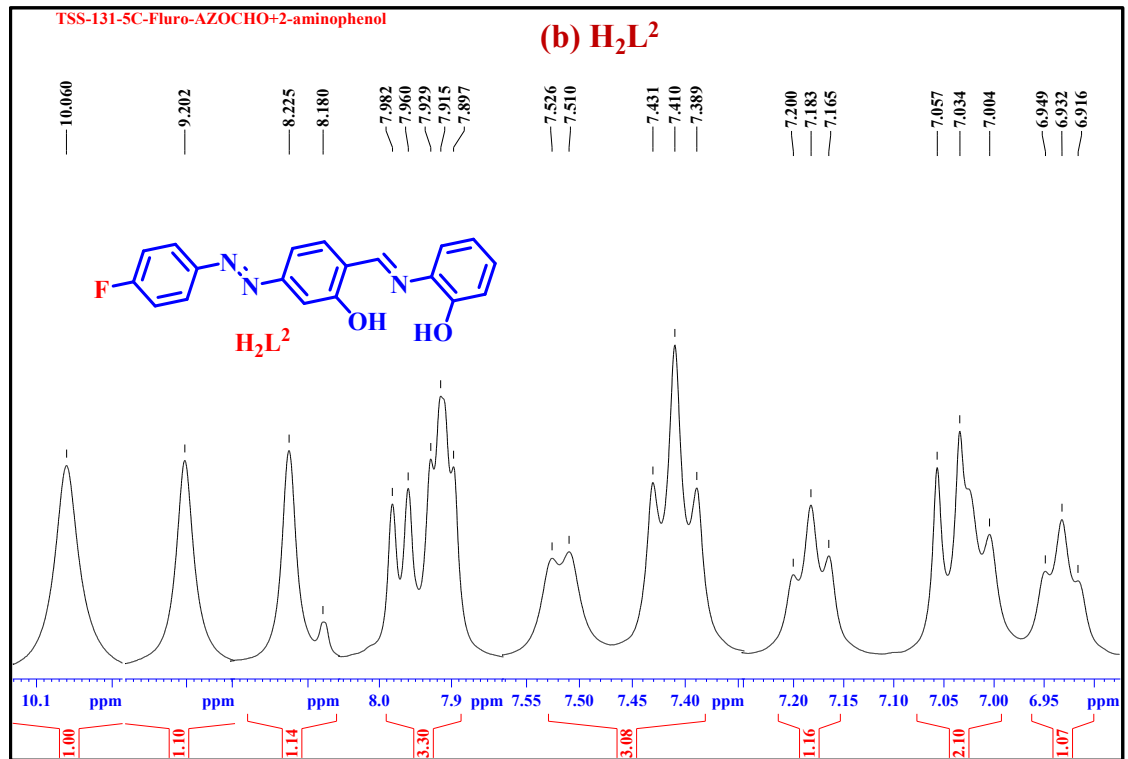

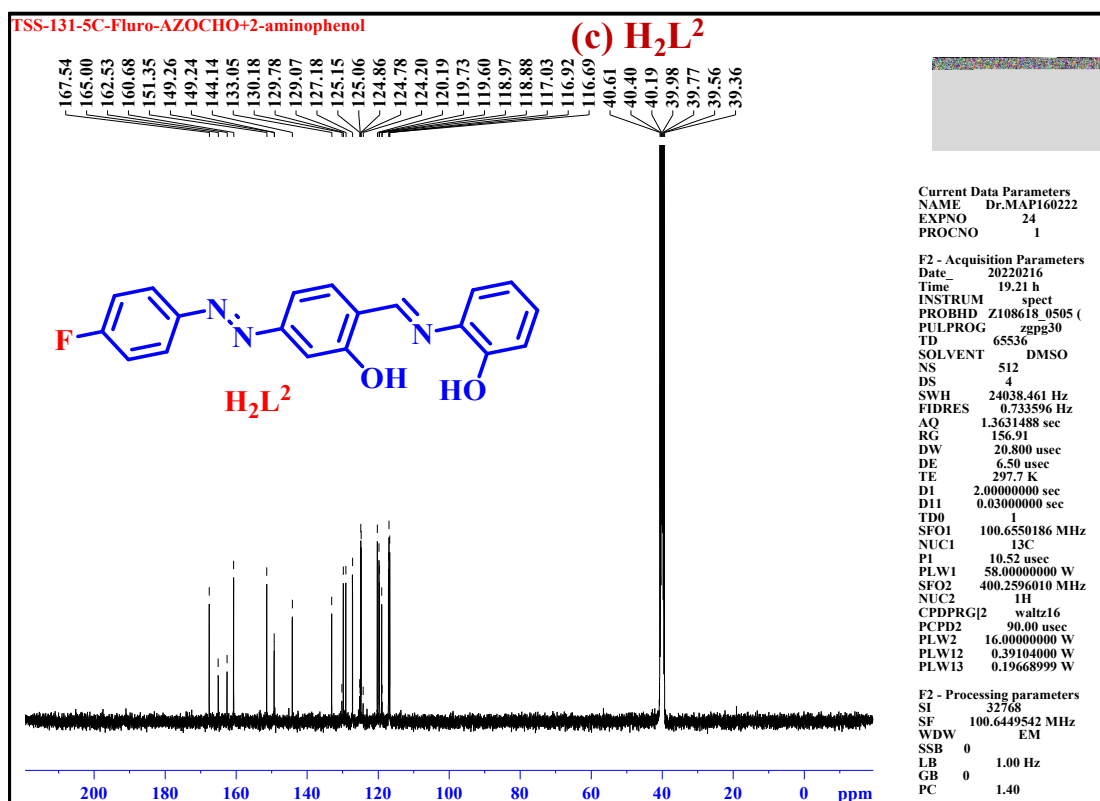

Fig. S2 NMR Spectrum of ligand  $H_2L^2$ : (a)  $^1H$  NMR spectrum, (b)  $^1H$  NMR expansion spectrum and (c)  $^{13}C$  NMR spectrum

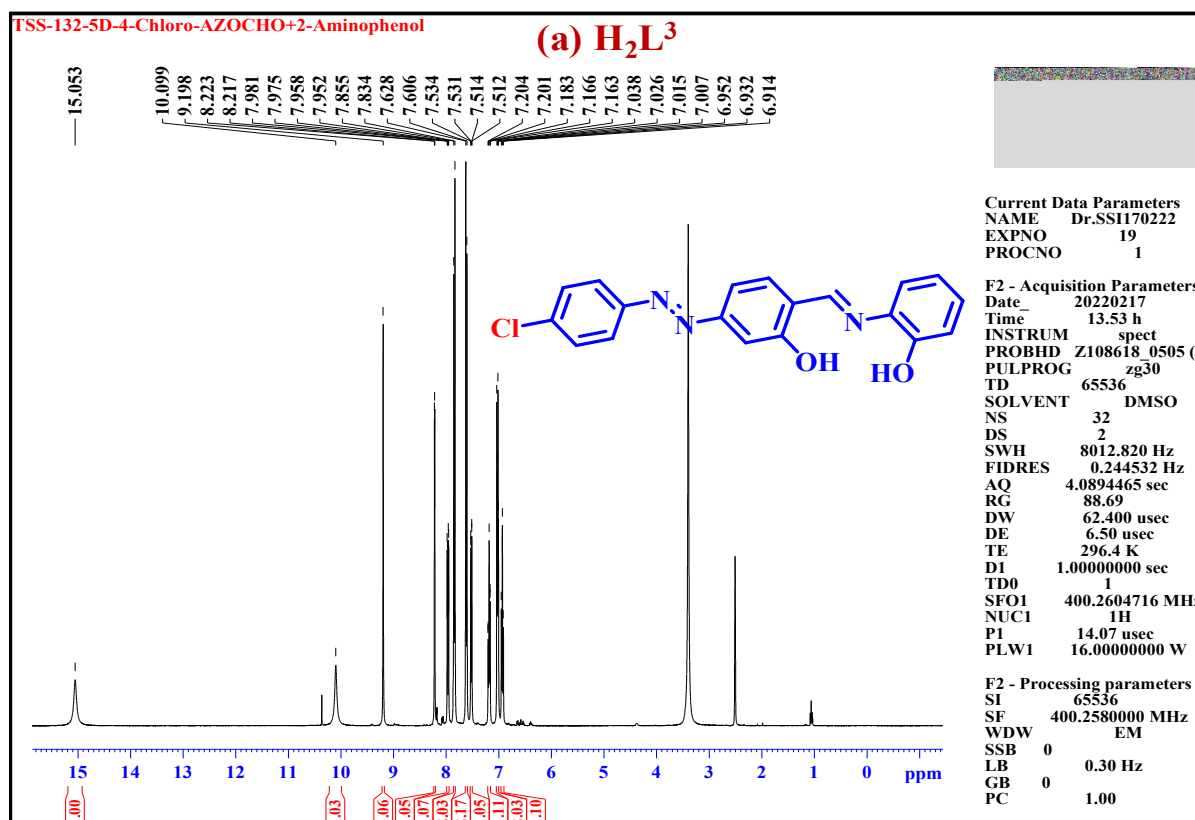

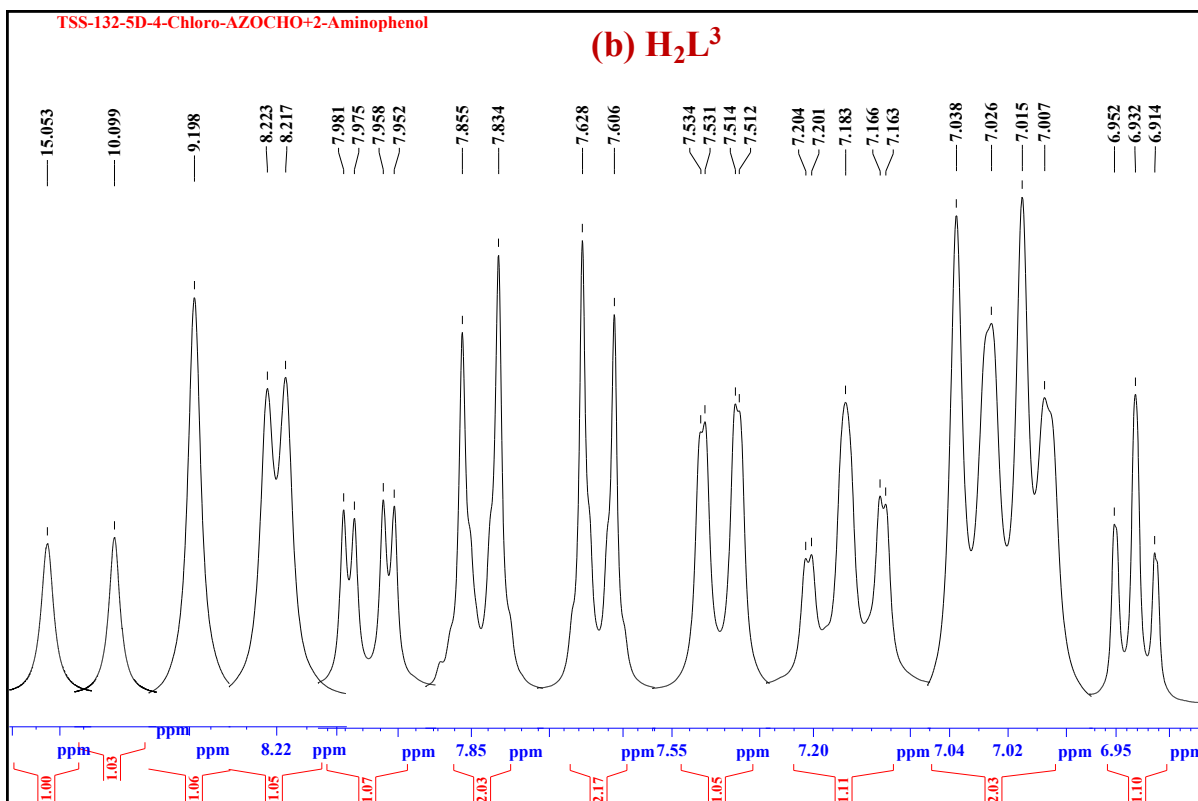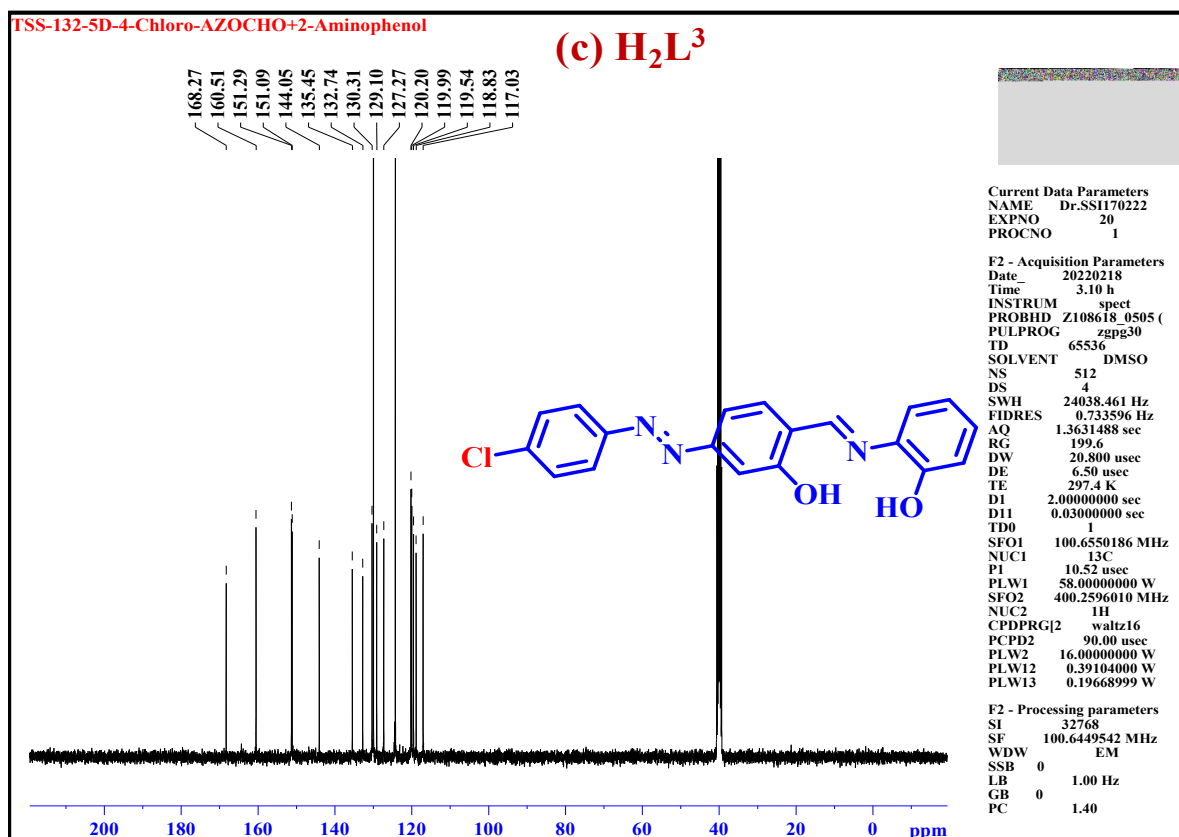

Fig. S3 NMR Spectrum of ligand  $H_2L^3$ : (a)  $^1H$  NMR spectrum, (b)  $^1H$  NMR expansion spectrum and (c)  $^{13}C$  NMR spectrum

TSS-158-5E-Br-AZO-2-AMINOPHENOL

(a) H<sub>2</sub>L<sup>4</sup>

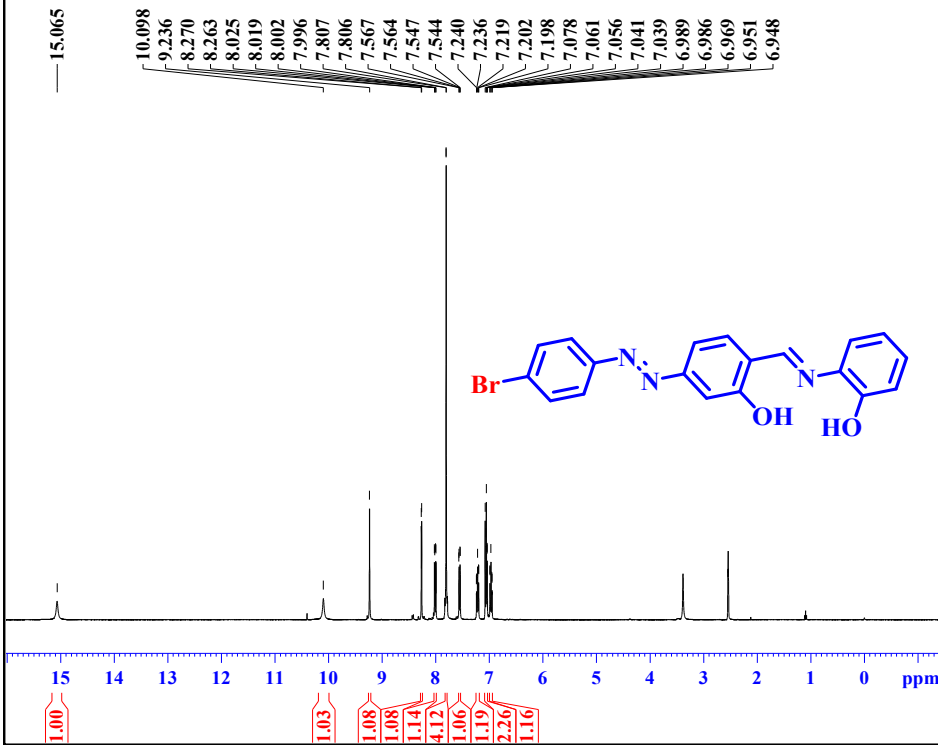

Current Data Parameters

|        |              |
|--------|--------------|
| NAME   | Dr.AMS110622 |
| EXPNO  | 10           |
| PROCNO | 1            |

F2 - Acquisition Parameters

|         |                 |
|---------|-----------------|
| Date_   | 20220610        |
| Time    | 16.27 h         |
| INSTRUM | spect           |
| PROBHD  | Z108618_0505 (  |
| PULPROG | zg30            |
| TD      | 65536           |
| SOLVENT | DMSO            |
| NS      | 32              |
| DS      | 2               |
| SWH     | 8012.820 Hz     |
| FIDRES  | 0.244532 Hz     |
| AQ      | 4.0894465 sec   |
| RG      | 127.79          |
| DW      | 62.400 usec     |
| DE      | 6.50 usec       |
| TE      | 300.2 K         |
| D1      | 1.0000000 sec   |
| TD0     | 1               |
| SFO1    | 400.2604716 MHz |
| NUC1    | 1H              |
| P1      | 14.07 usec      |
| PLW1    | 16.00000000 W   |

F2 - Processing parameters

|     |                 |
|-----|-----------------|
| SI  | 65536           |
| SF  | 400.2579863 MHz |
| WDW | EM              |
| SSB | 0               |
| LB  | 0.30 Hz         |
| GB  | 0               |
| PC  | 1.00            |

TSS-158-5E-Br-AZOCHO-2-AMINOPHENOL

(b) H<sub>2</sub>L<sup>4</sup>

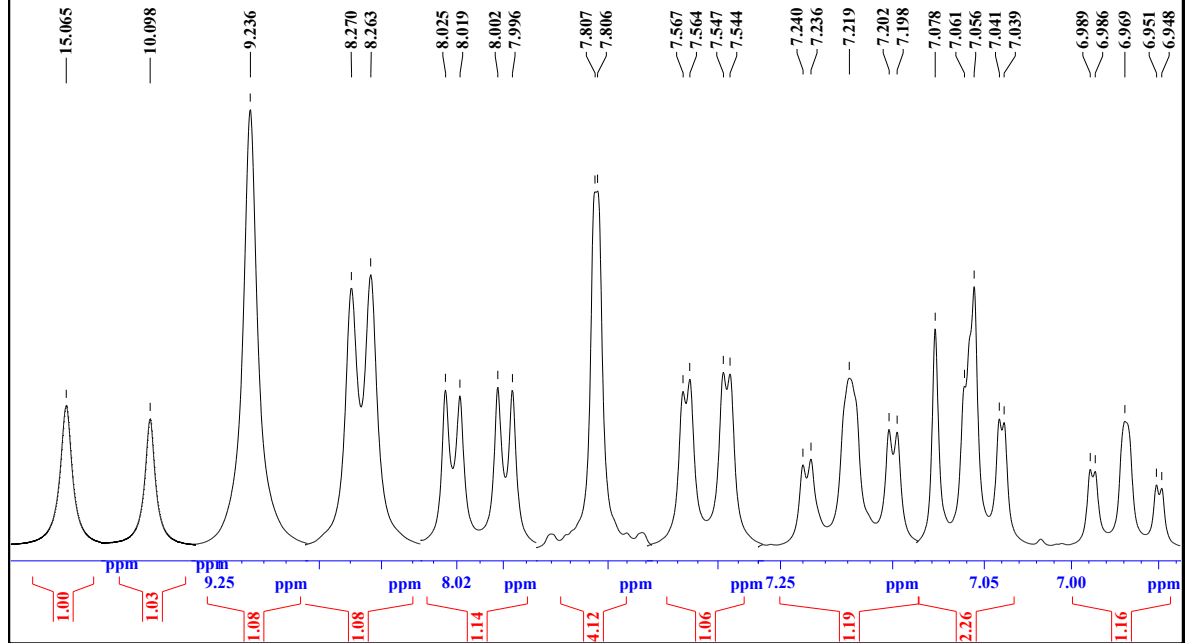



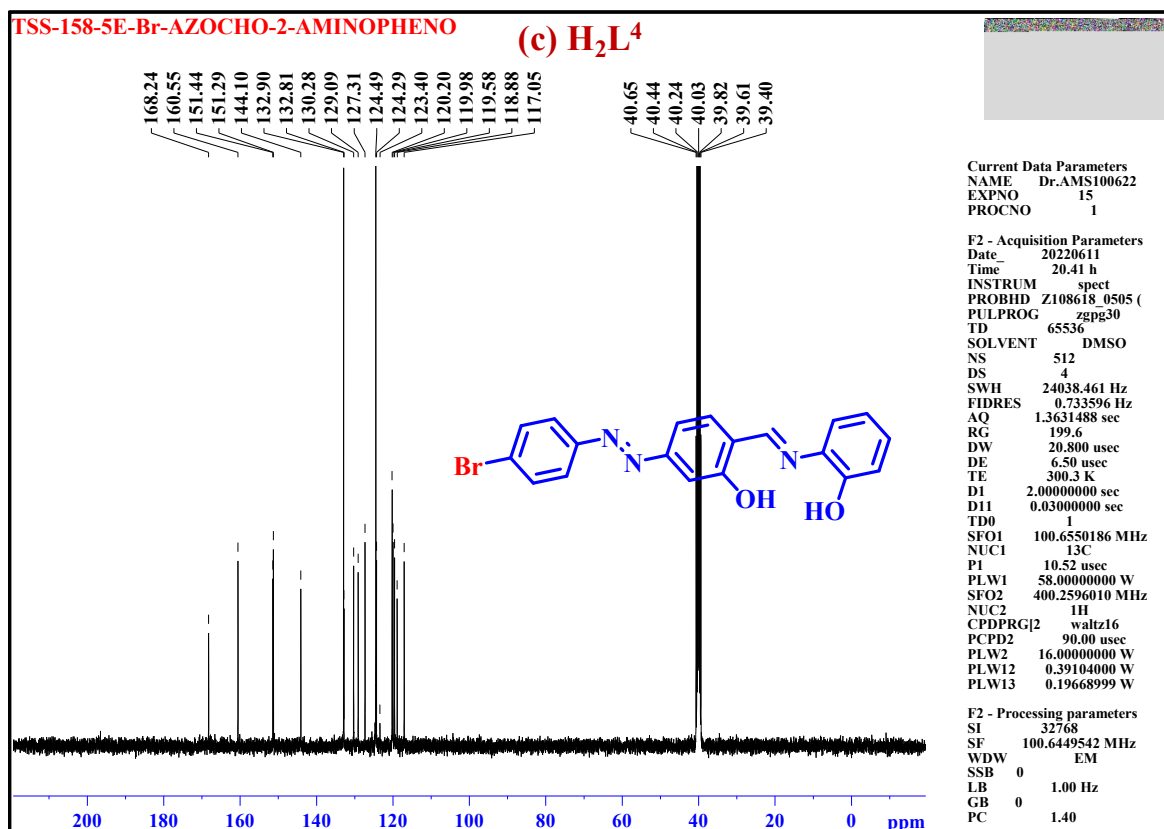

**Fig. 4** NMR Spectrum of ligand H<sub>2</sub>L<sup>4</sup>: **(a)** <sup>1</sup>H NMR spectrum, **(b)** <sup>1</sup>H NMR expansion spectrum and **(c)** <sup>13</sup>C NMR spectrum

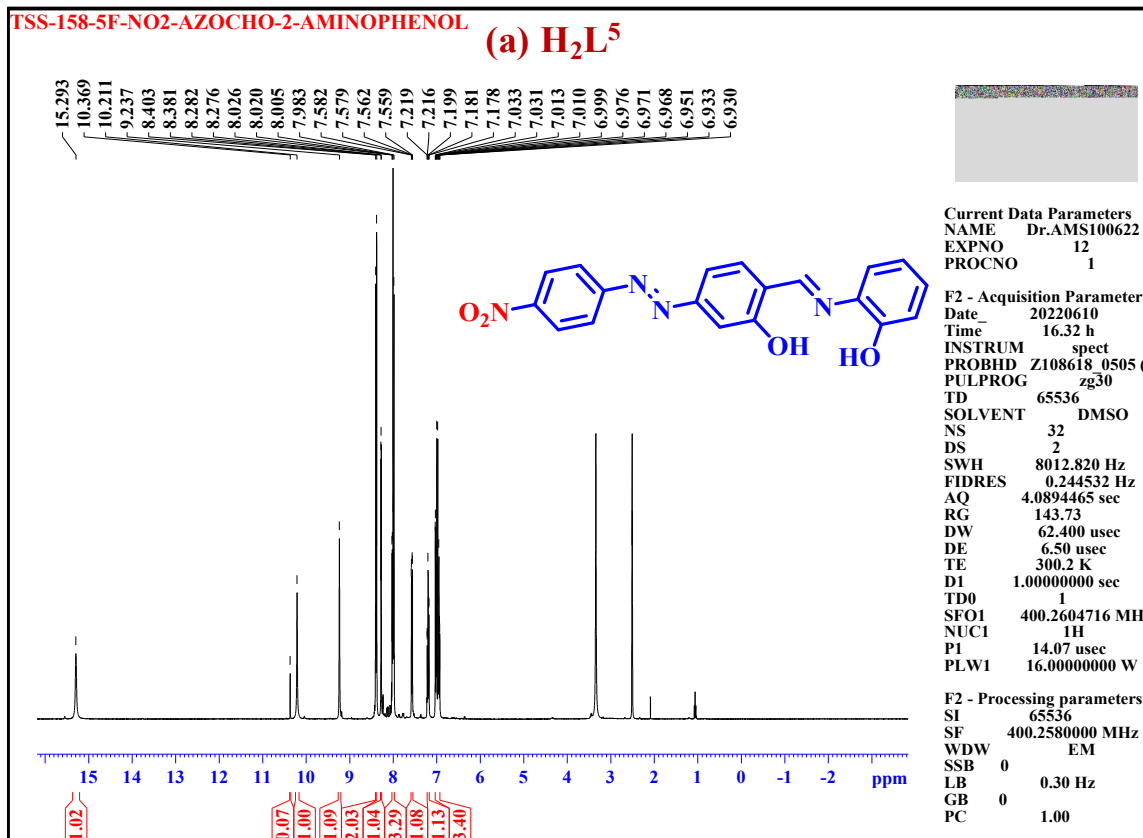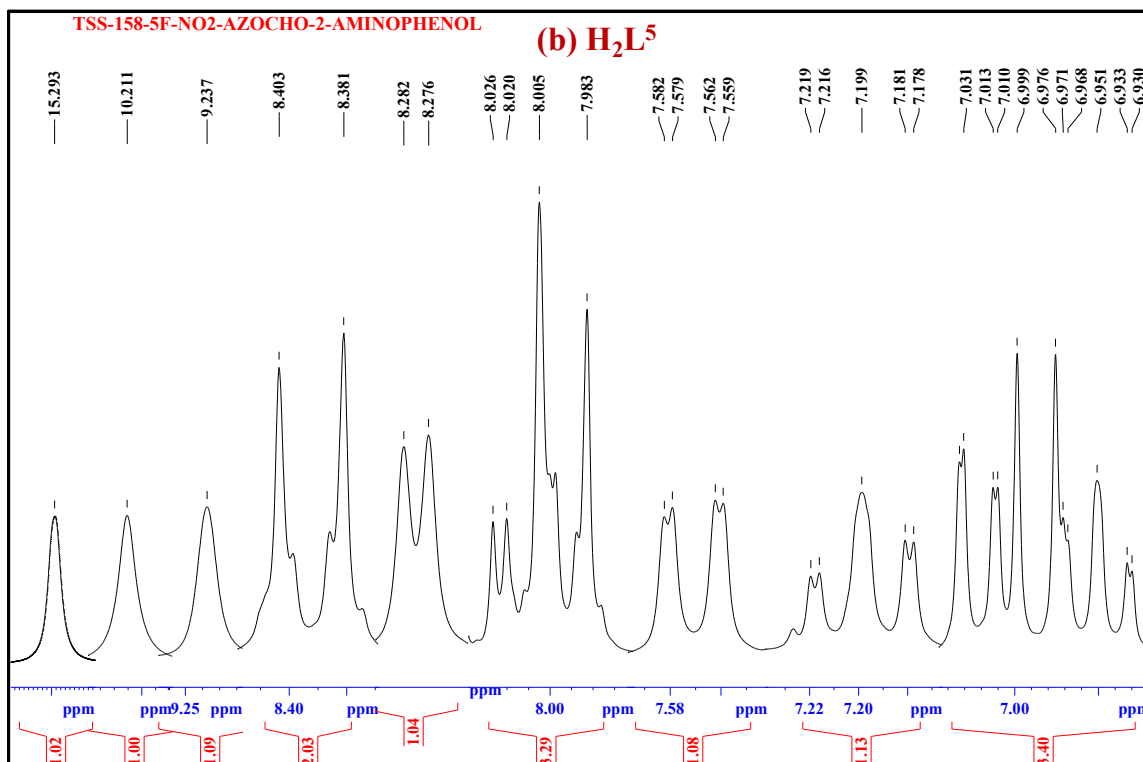

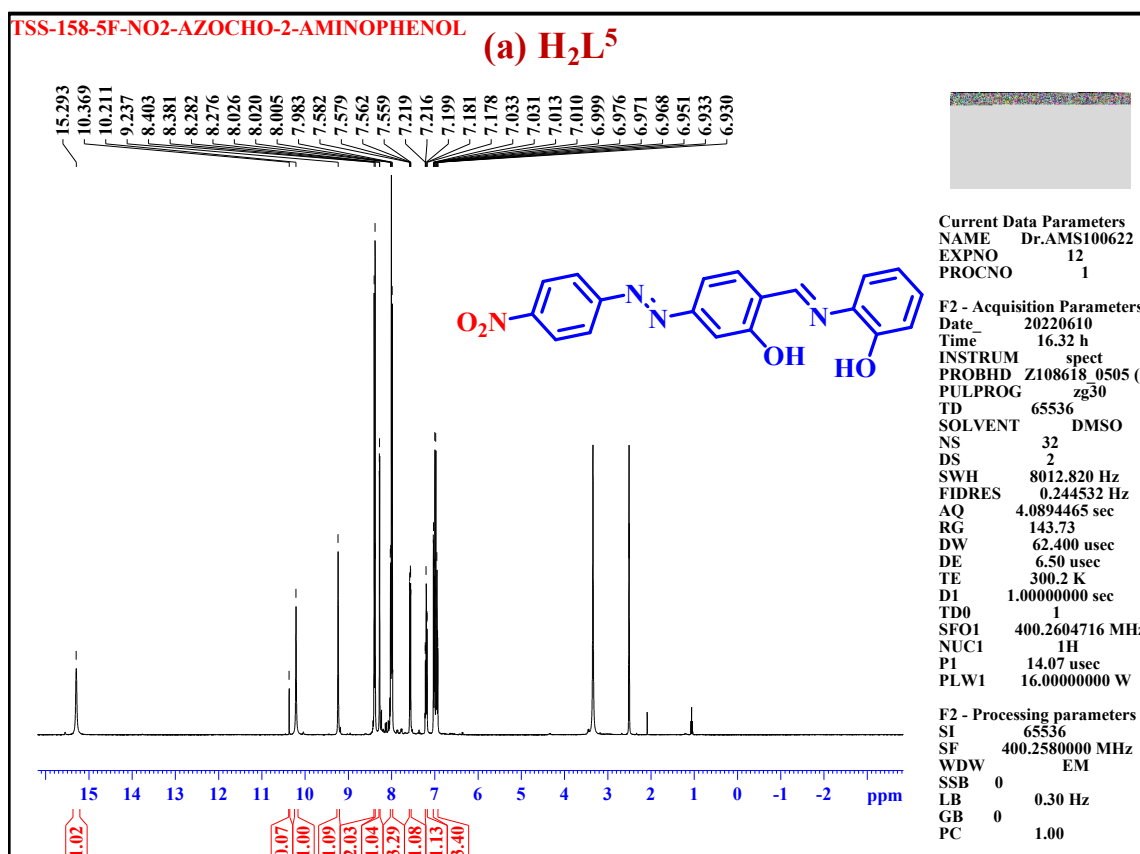

Fig. S5 NMR Spectrum of ligand H<sub>2</sub>L<sup>5</sup>: (a) <sup>1</sup>H NMR spectrum, (b) <sup>1</sup>H NMR expansion spectrum (c) <sup>13</sup>C NMR spectrum

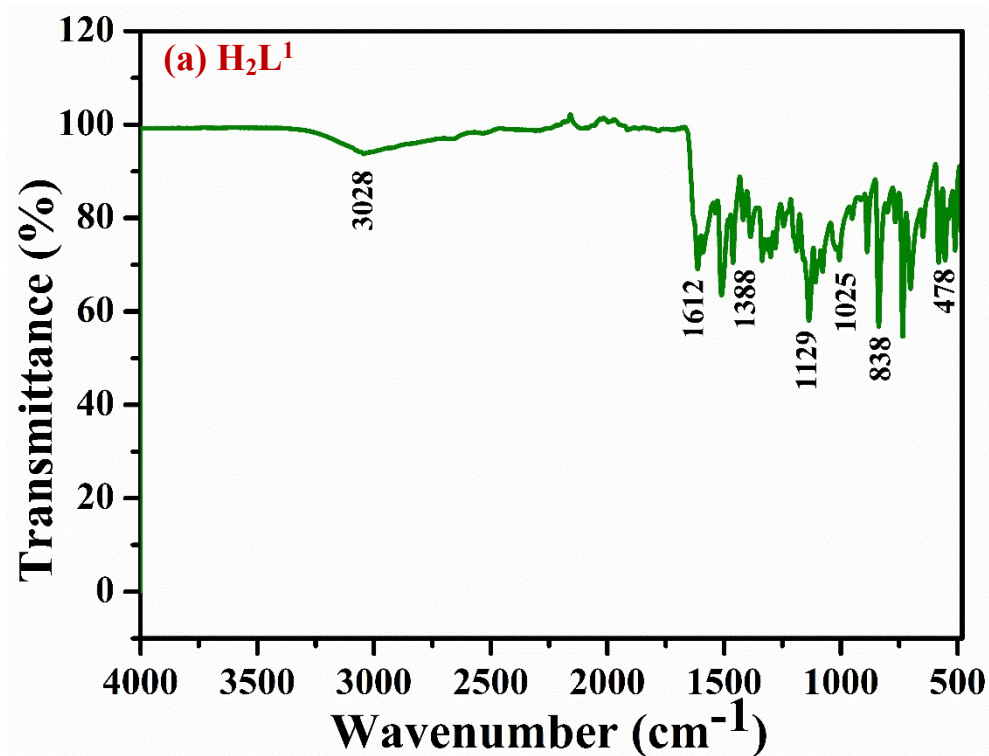

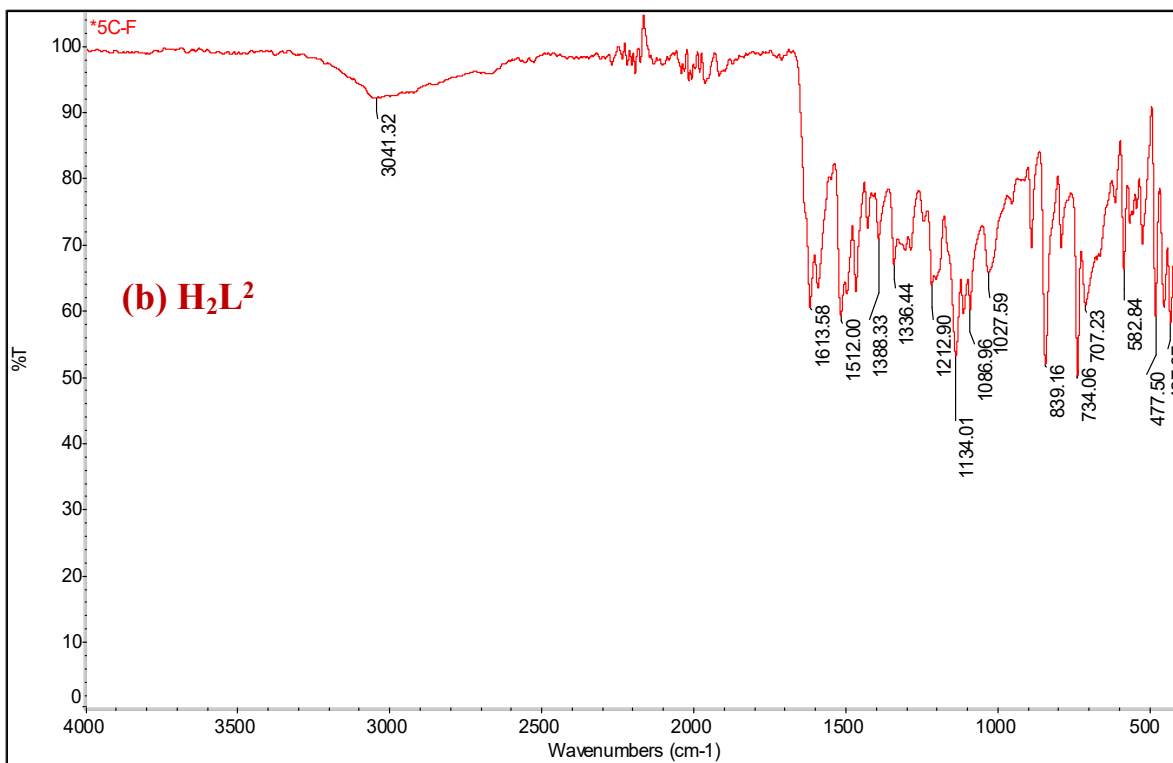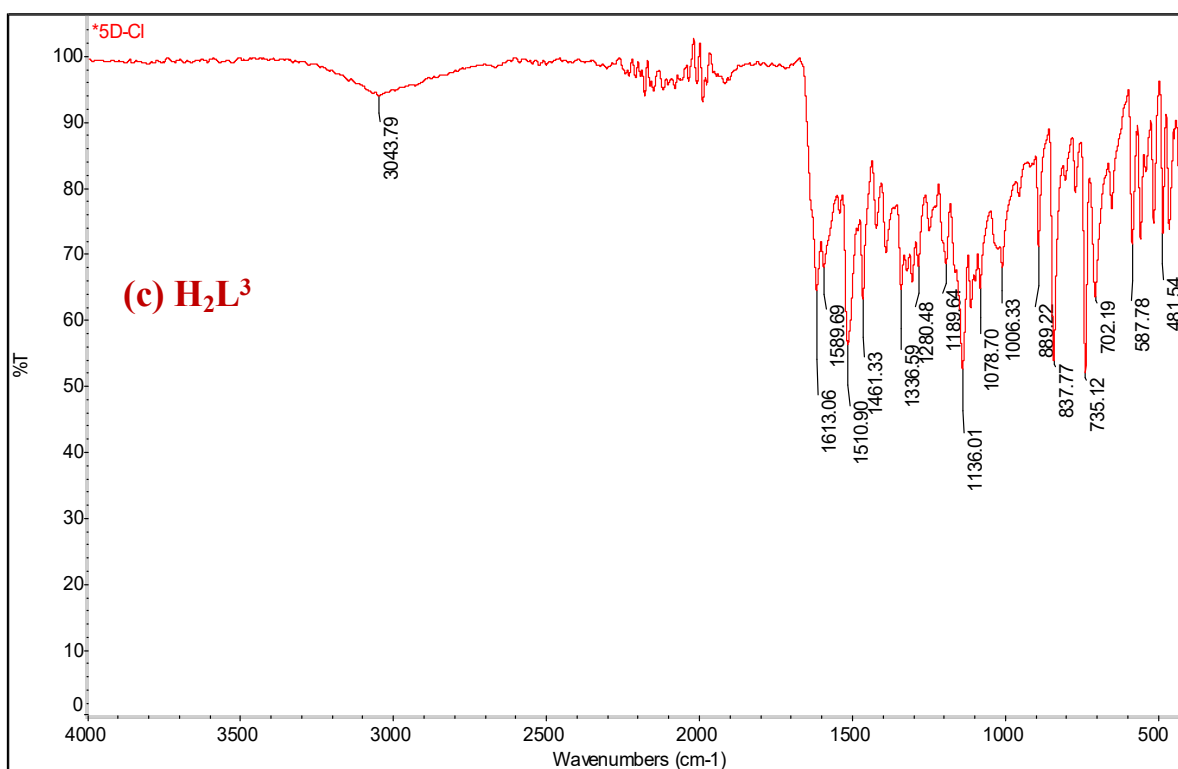

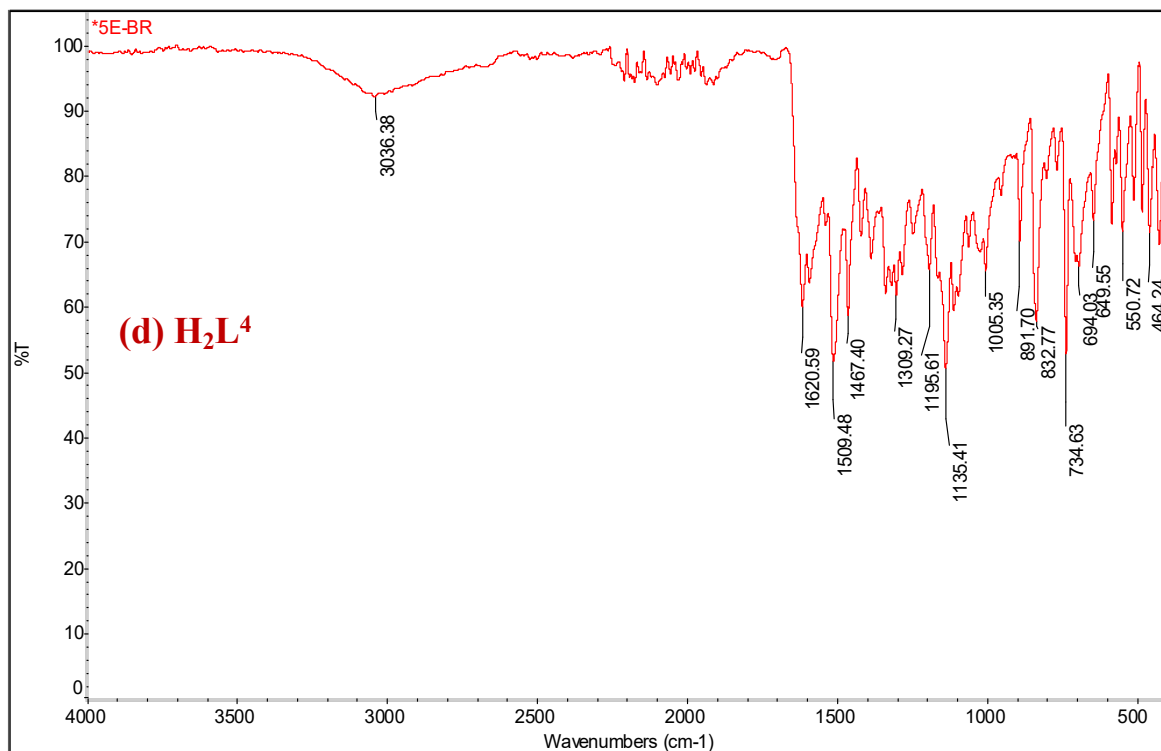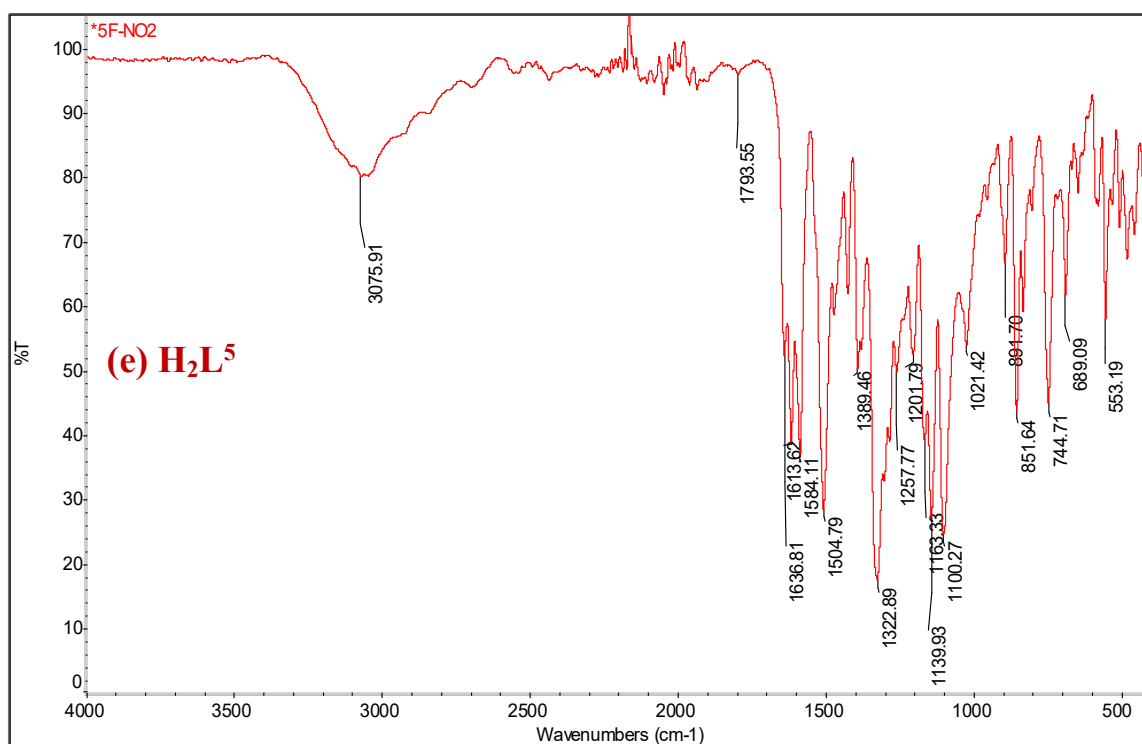

**Fig. S6** FTIR Spectra of ligands **(a)** H<sub>2</sub>L<sup>1</sup>, **(b)** H<sub>2</sub>L<sup>2</sup>, **(c)** H<sub>2</sub>L<sup>3</sup>, **(d)** H<sub>2</sub>L<sup>4</sup> and **(e)** H<sub>2</sub>L<sup>5</sup>

TSS-231-6K (TiH<sub>2</sub>L<sub>1</sub>)

(a) TiH<sub>2</sub>L<sub>1</sub>

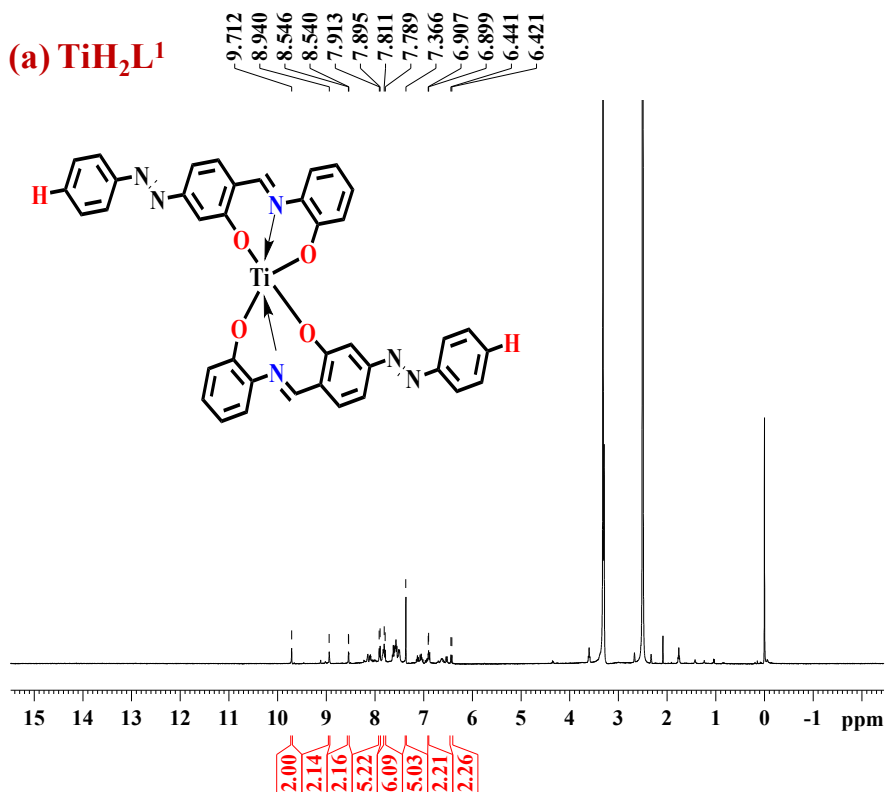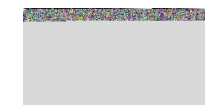

Current Data Parameters  
 NAME Dr.MAP240423  
 EXPNO 60  
 PROCNO 1

F2 - Acquisition Parameters  
 Date\_ 20230425  
 Time 3.20 h  
 INSTRUM spect  
 PROBHD Z108618\_0505 (zg30)  
 PULPROG zg30  
 TD 65536  
 SOLVENT DMSO  
 NS 64  
 DS 2  
 SWH 8012.820 Hz  
 FIDRES 0.244532 Hz  
 AQ 4.0894465 sec  
 RG 199.6  
 DW 62.400 usec  
 DE 6.50 usec  
 TE 304.4 K  
 D1 1.00000000 sec  
 TD0 1  
 SFO1 400.2604716 MHz  
 NUC1 1H  
 P1 15.00 usec  
 PLW1 14.95499992 W

F2 - Processing parameters  
 SI 65536  
 SF 400.2580023 MHz  
 WDW EM  
 SSB 0  
 LB 0.30 Hz  
 GB 0  
 PC 1.00

TSS-231-6K (TiH<sub>2</sub>L<sub>1</sub>)

(b) TiH<sub>2</sub>L<sub>1</sub>

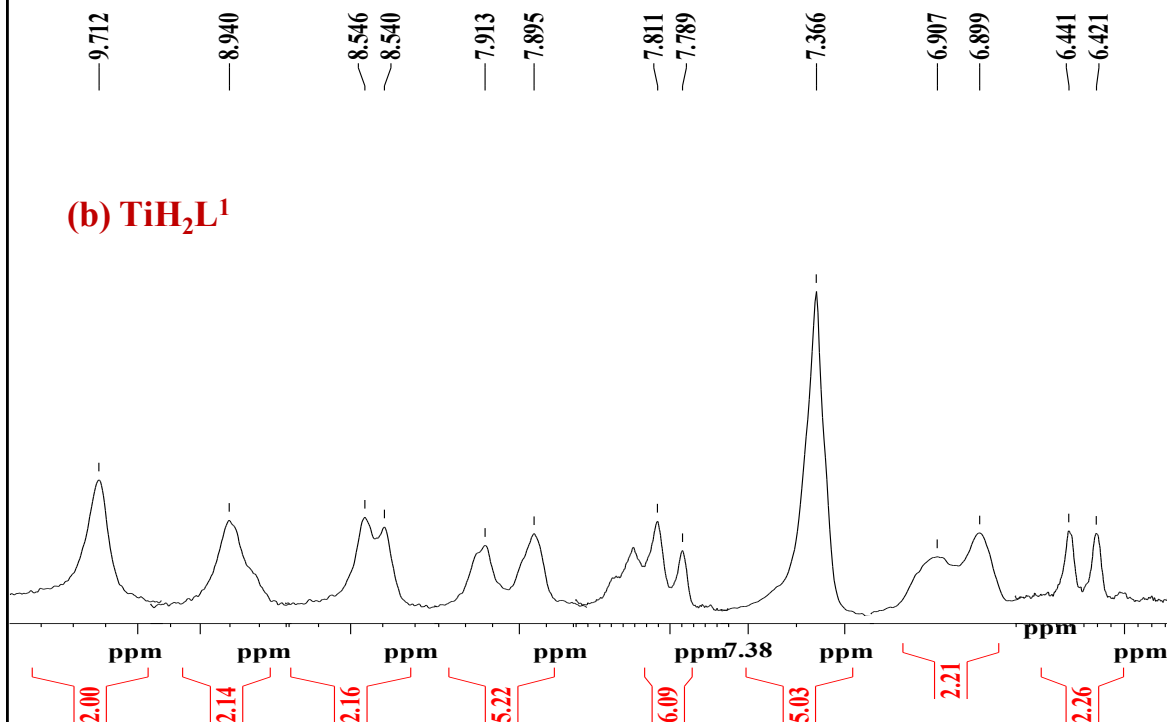

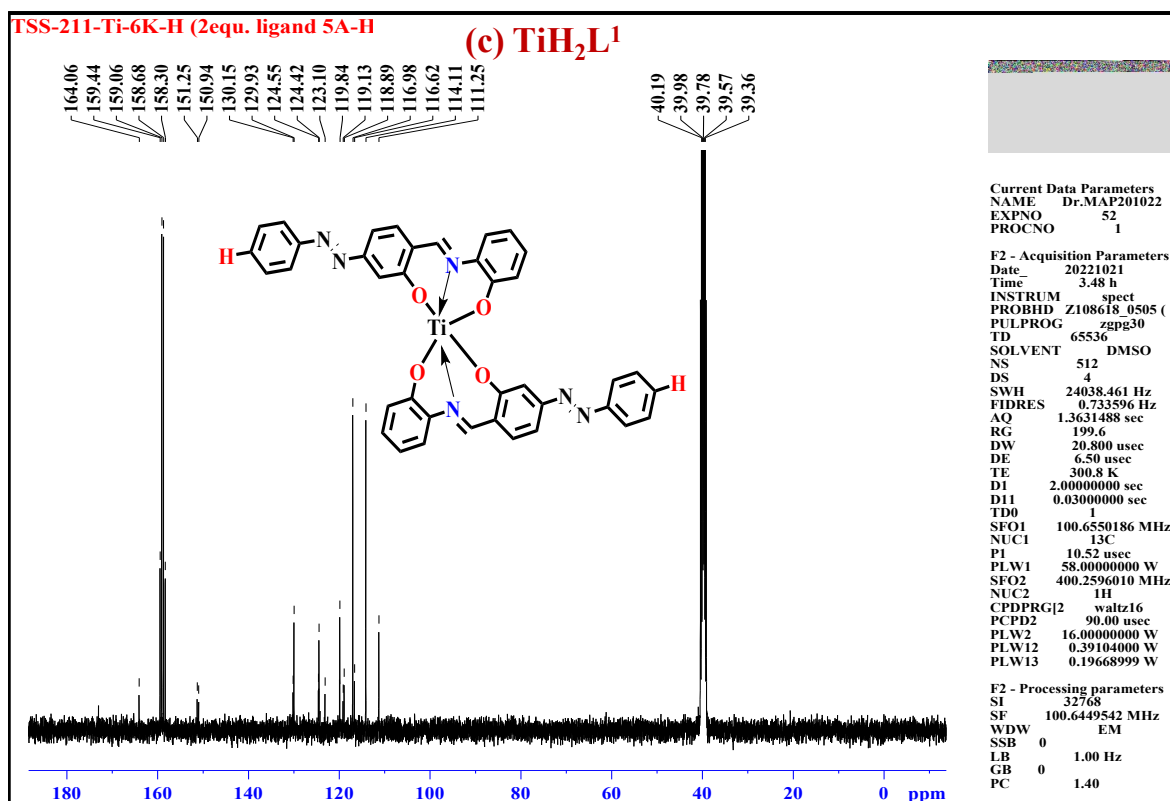

SI Fig. 7. NMR Spectrum of  $TiH_2L^1$ : (a)  $^1H$  NMR spectrum, (b)  $^1H$  NMR expansion spectrum (c)  $^{13}C$  NMR spectrum

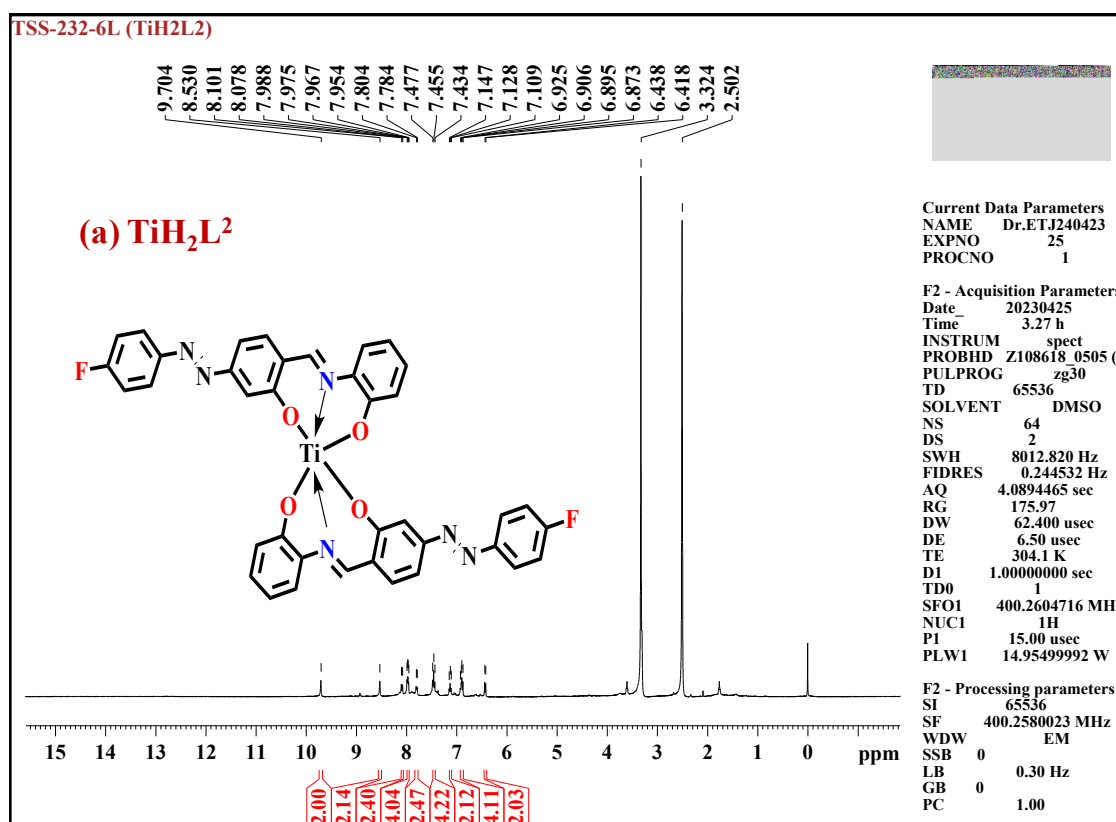

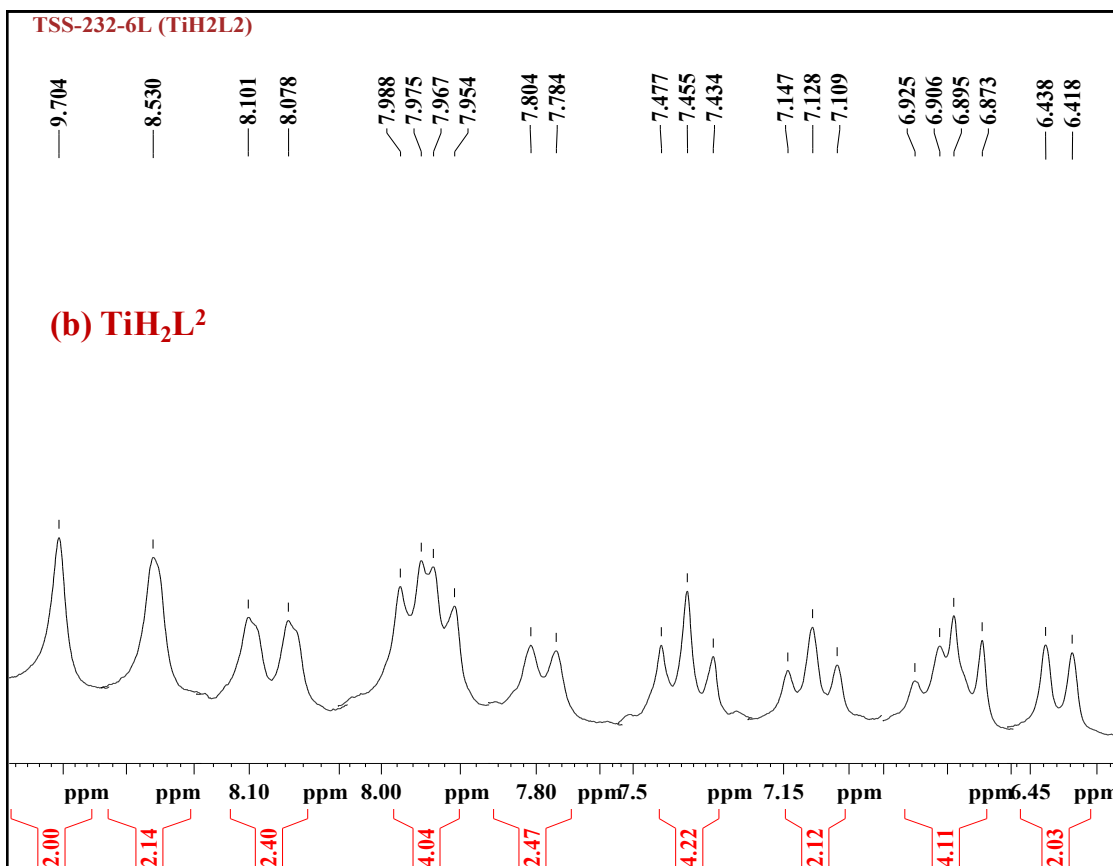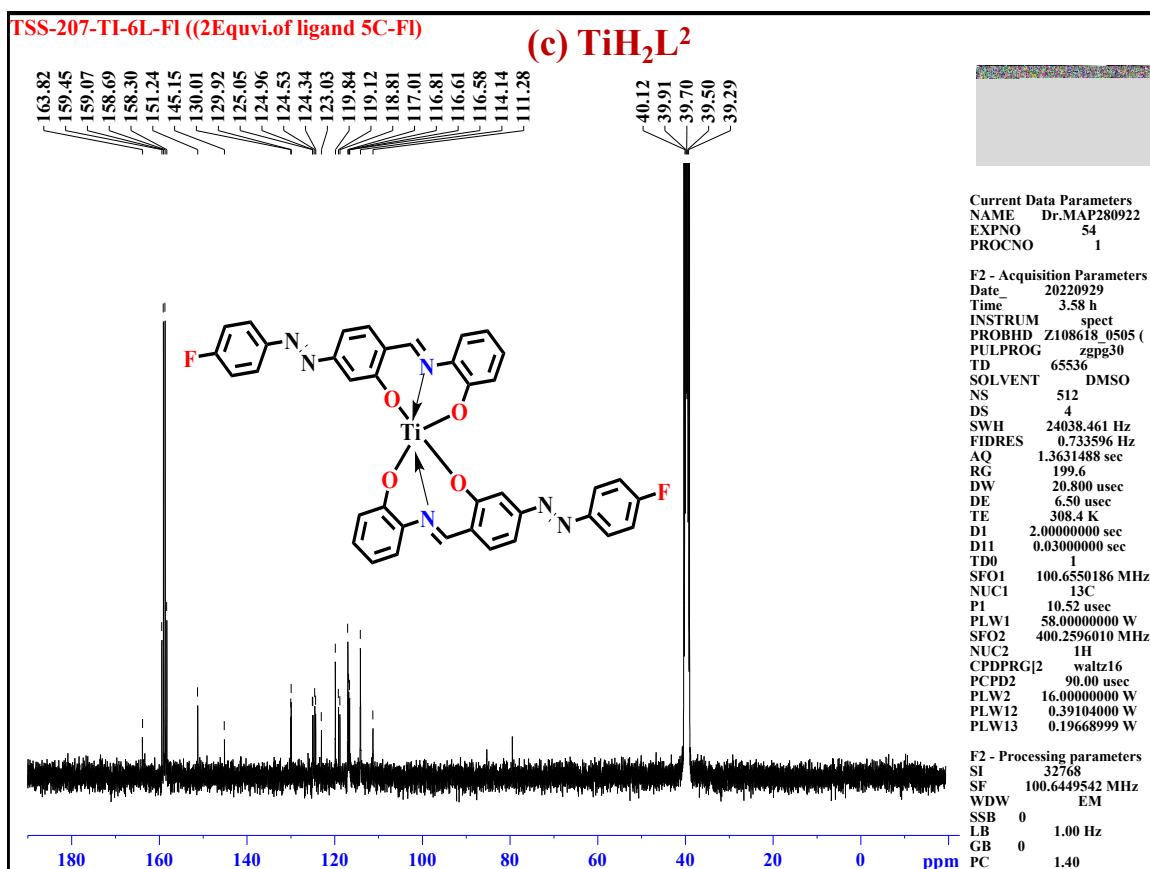

Fig. S8 NMR Spectrum of TiH<sub>2</sub>L<sub>2</sub>: (a) <sup>1</sup>H NMR spectrum, (b) <sup>1</sup>H NMR expansion spectrum (c) <sup>13</sup>C NMR spectrum



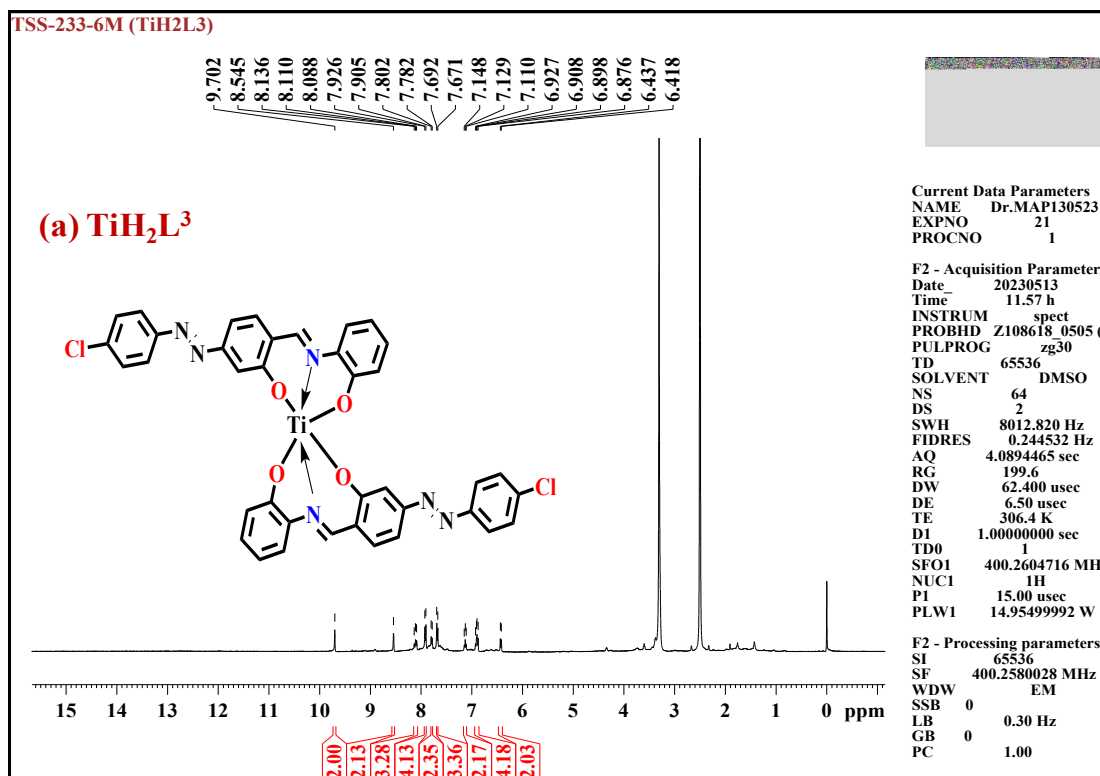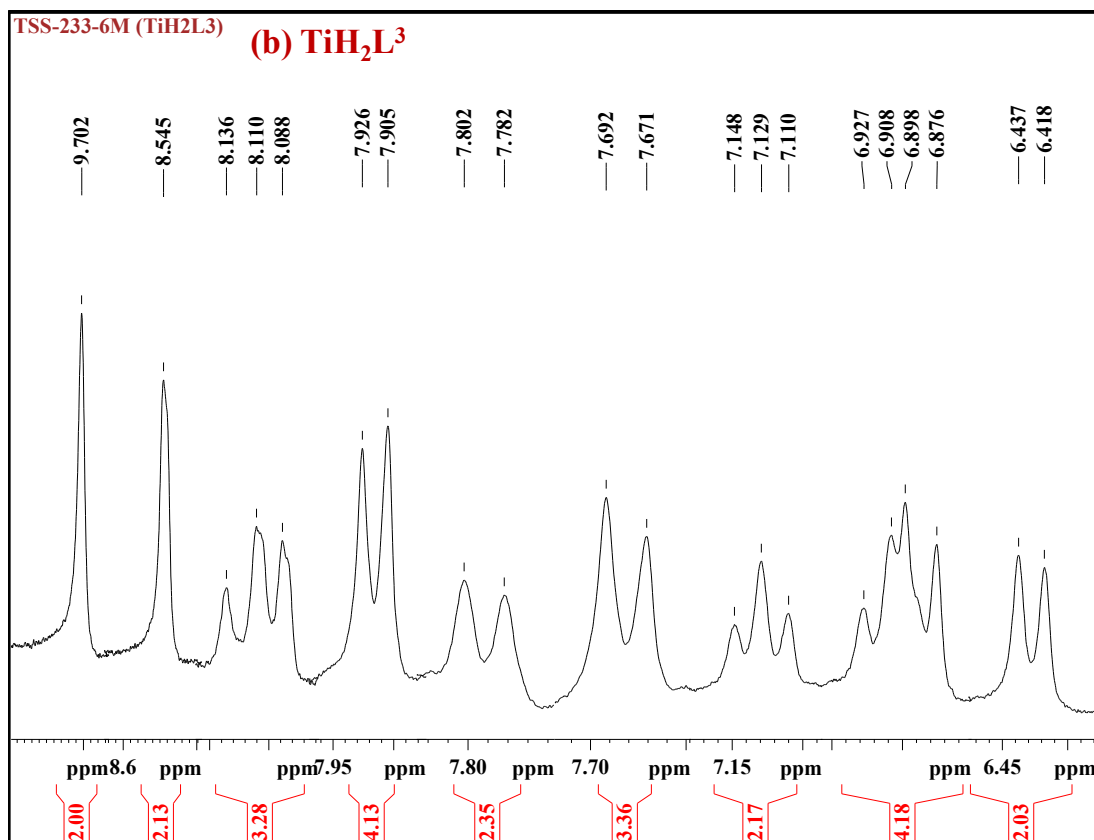

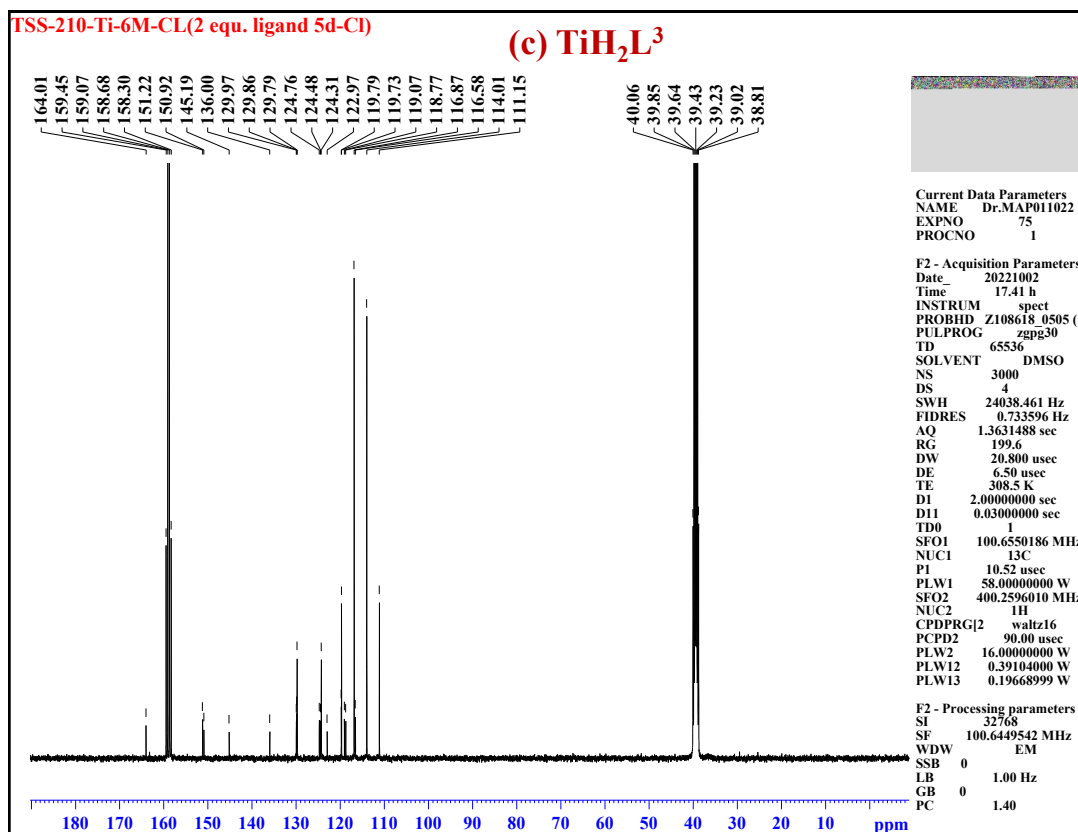

Fig. S9 NMR Spectrum of  $TiH_2L^3$ : (a)  $^1H$  NMR spectrum, (b)  $^1H$  NMR expansion spectrum (c)  $^{13}C$  NMR spectrum

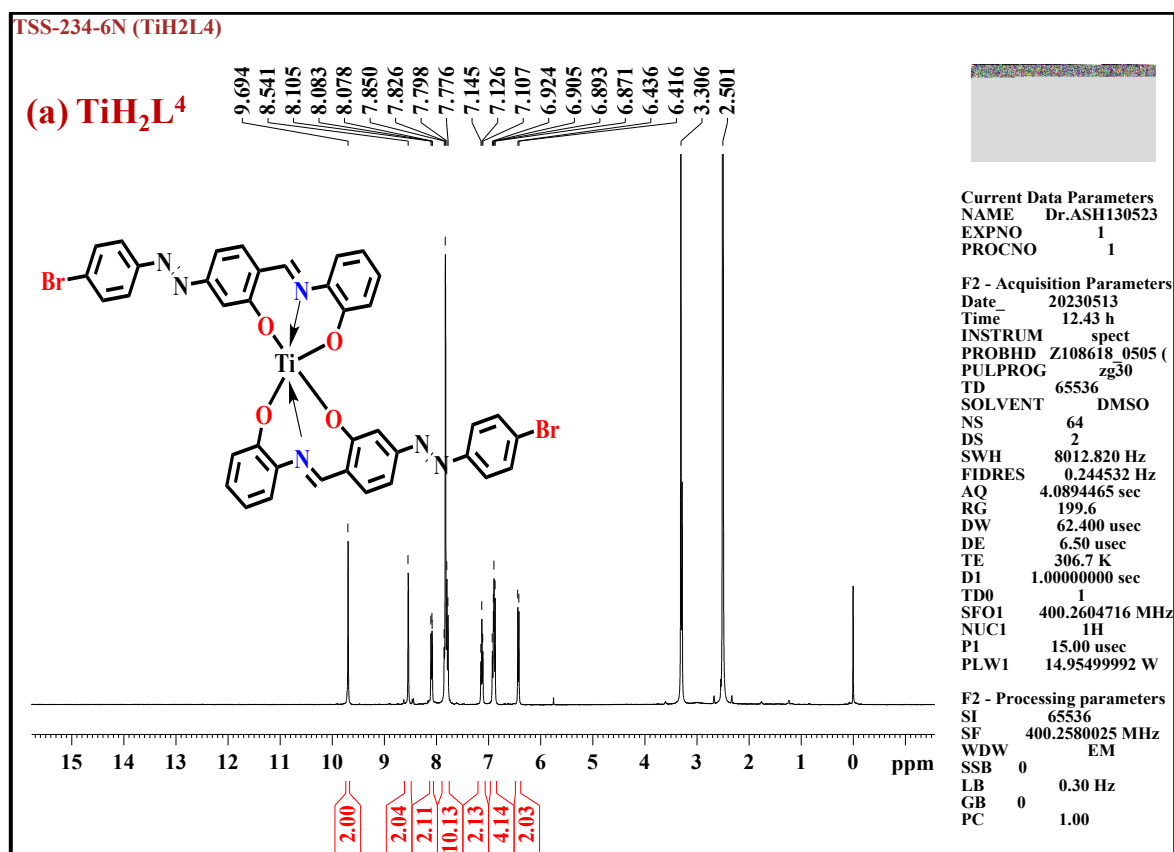

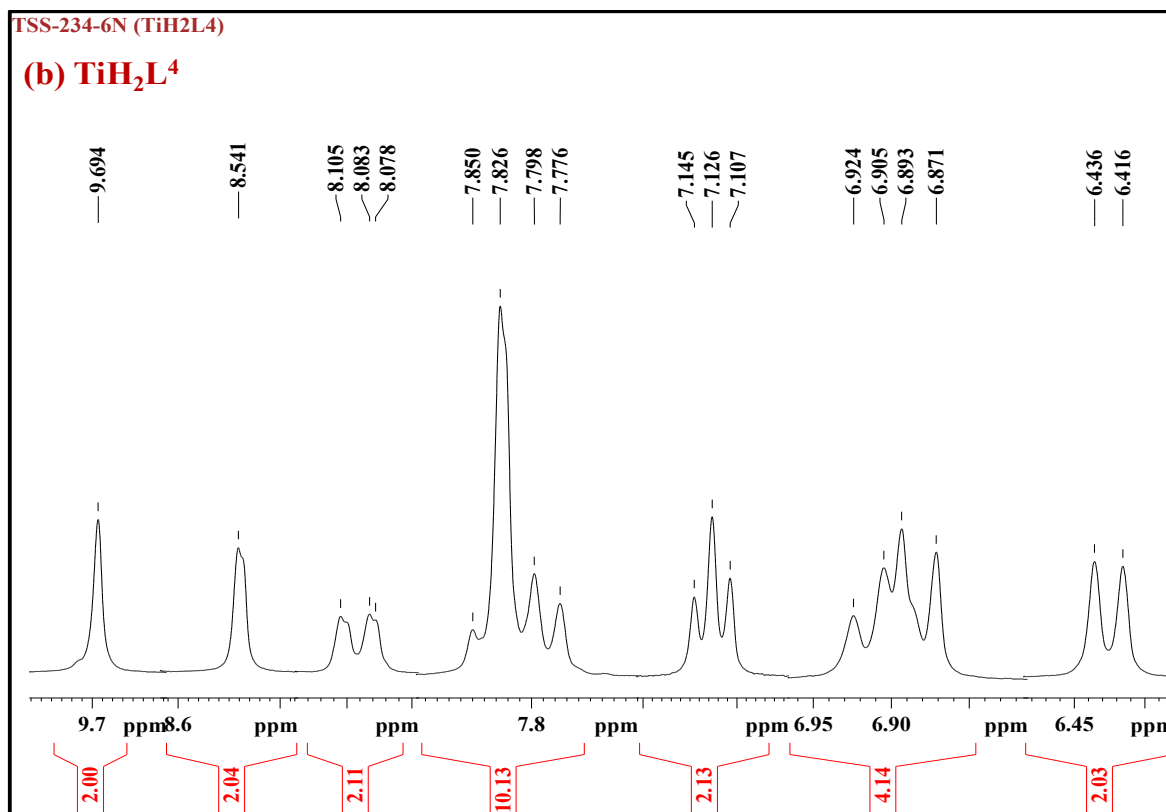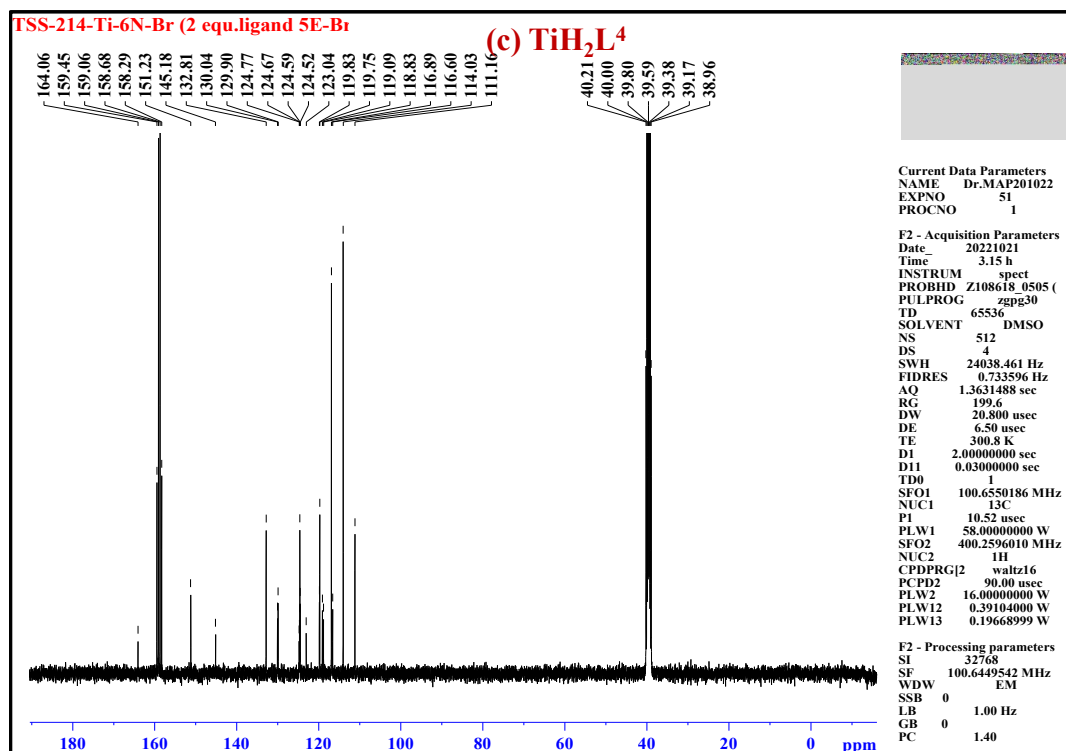

Fig. S10 NMR Spectrum of TiH<sub>2</sub>L<sub>4</sub>: (a) <sup>1</sup>H NMR spectrum, (b) <sup>1</sup>H NMR expansion spectrum (c) <sup>13</sup>C NMR spectrum

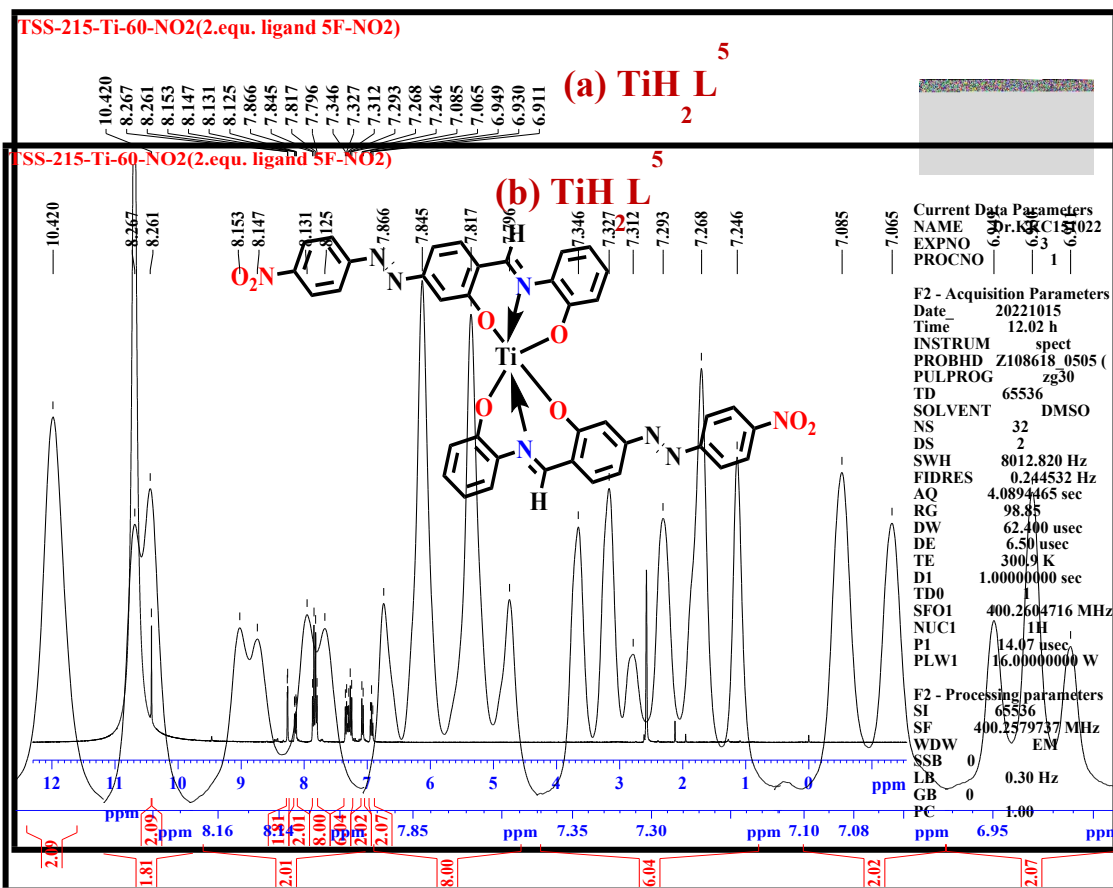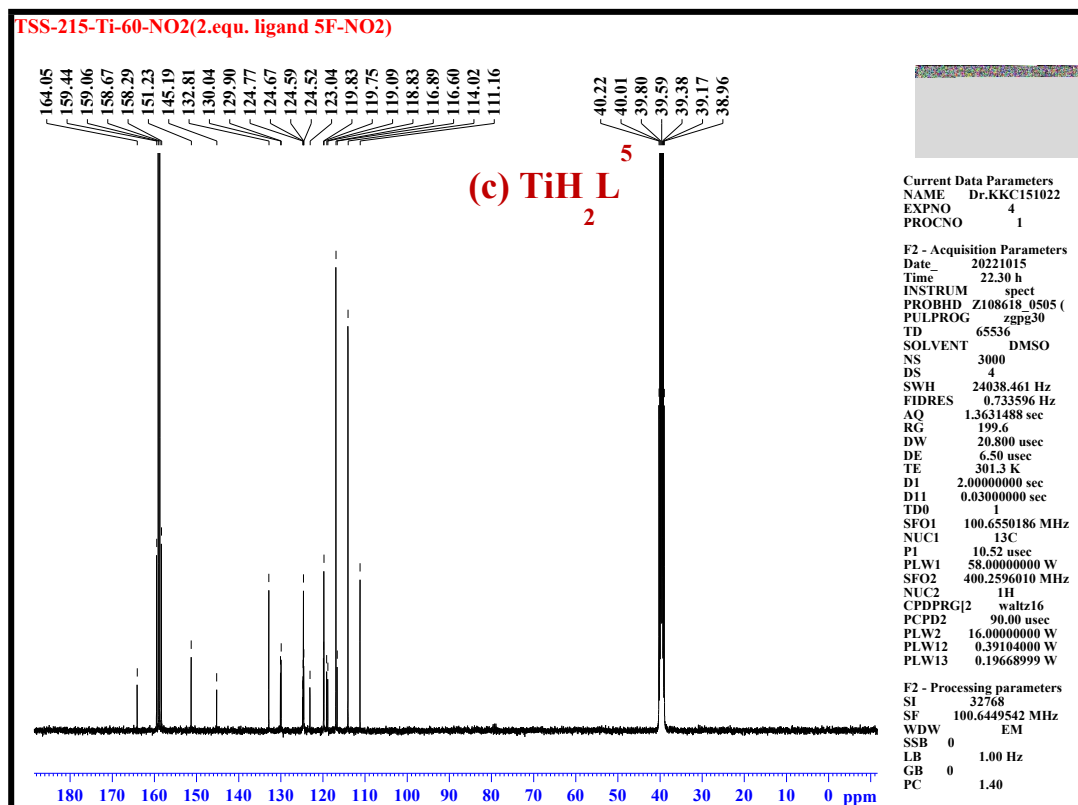

**Fig. S11** NMR Spectrum of  $TiH_2L^5$ :

(a)  $^1\text{H}$  NMR spectrum, (b)  $^1\text{H}$  NMR expansion spectrum (c)  $^{13}\text{C}$  NMR spectrum

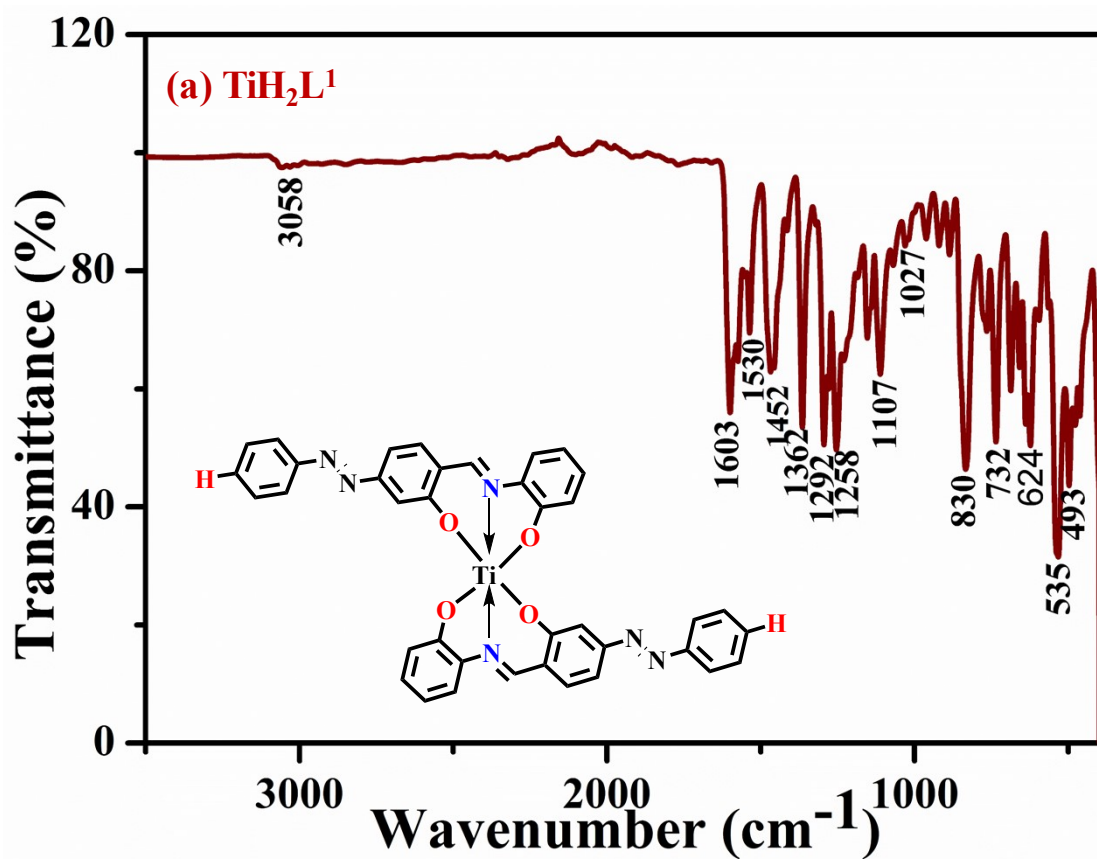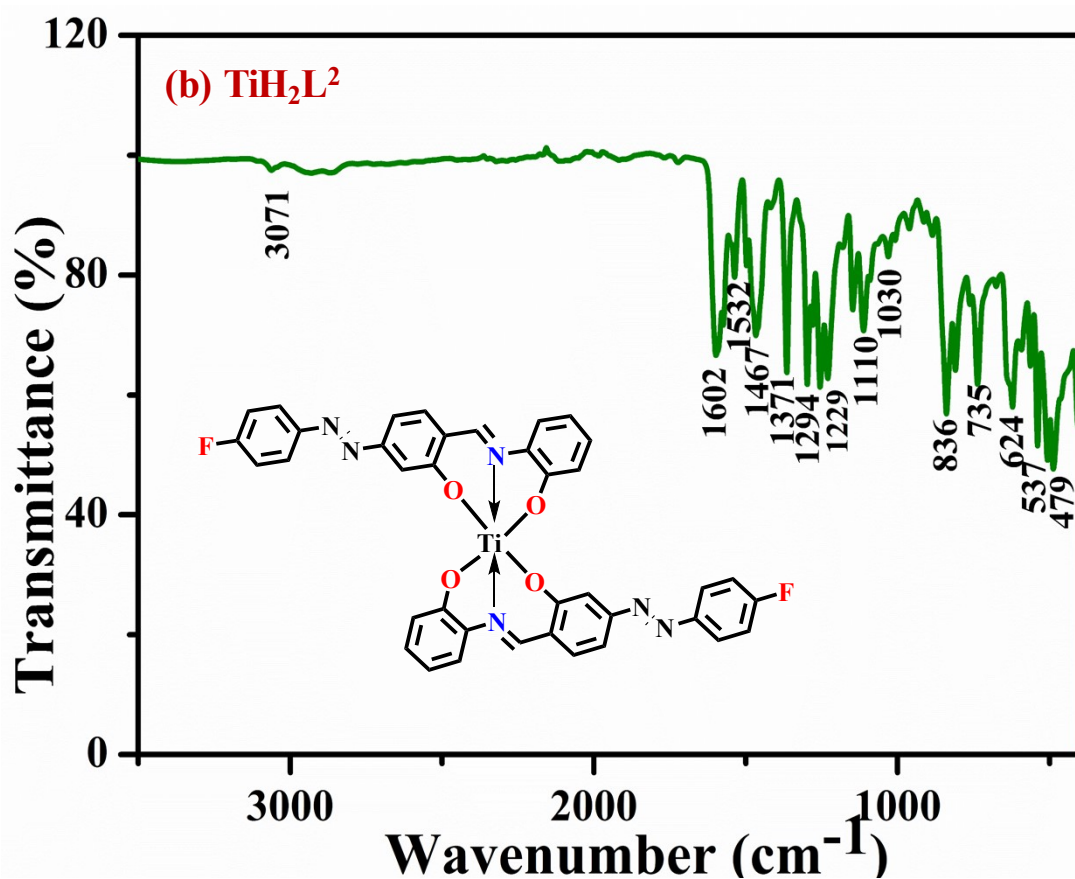

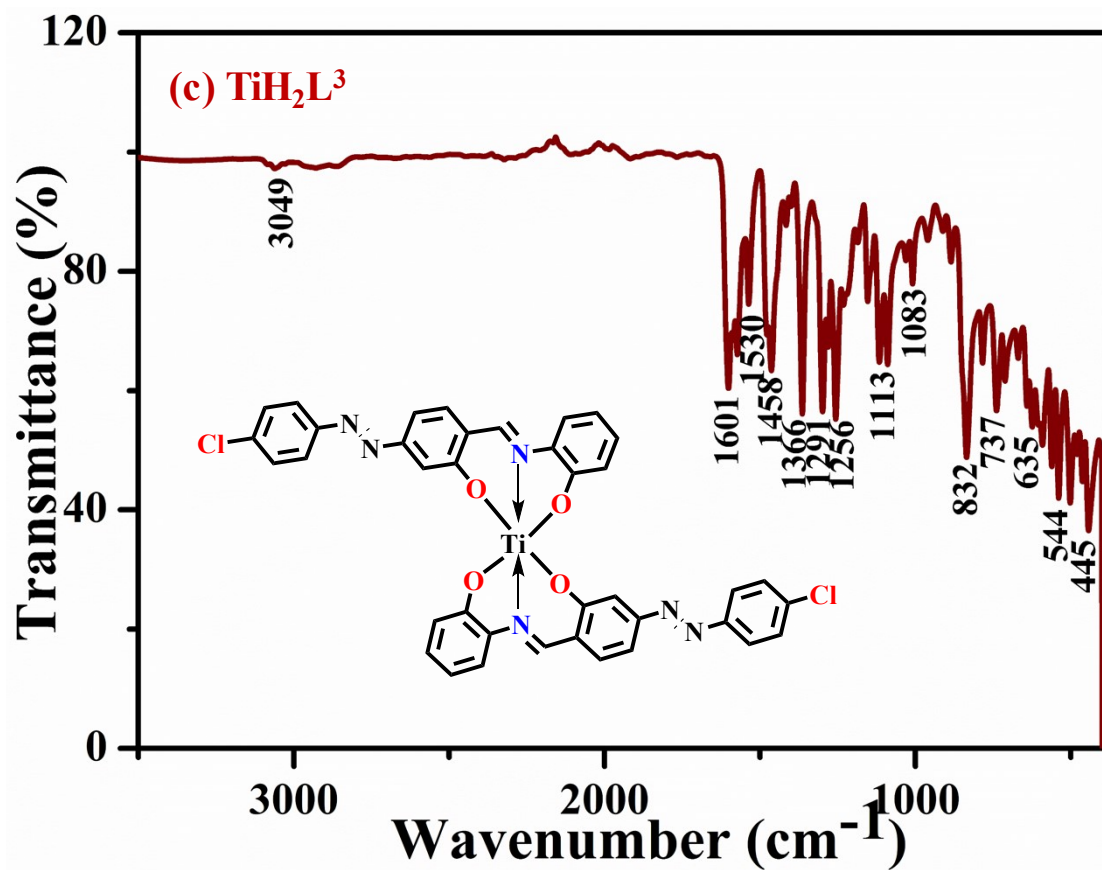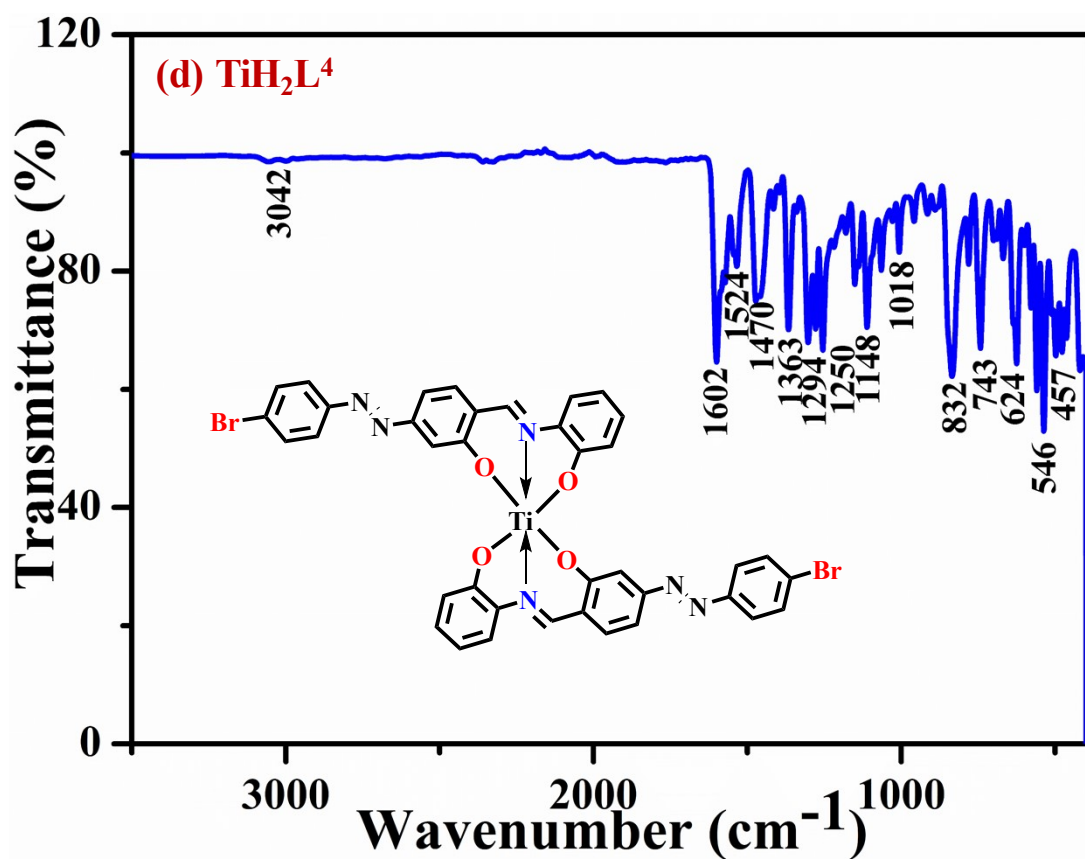

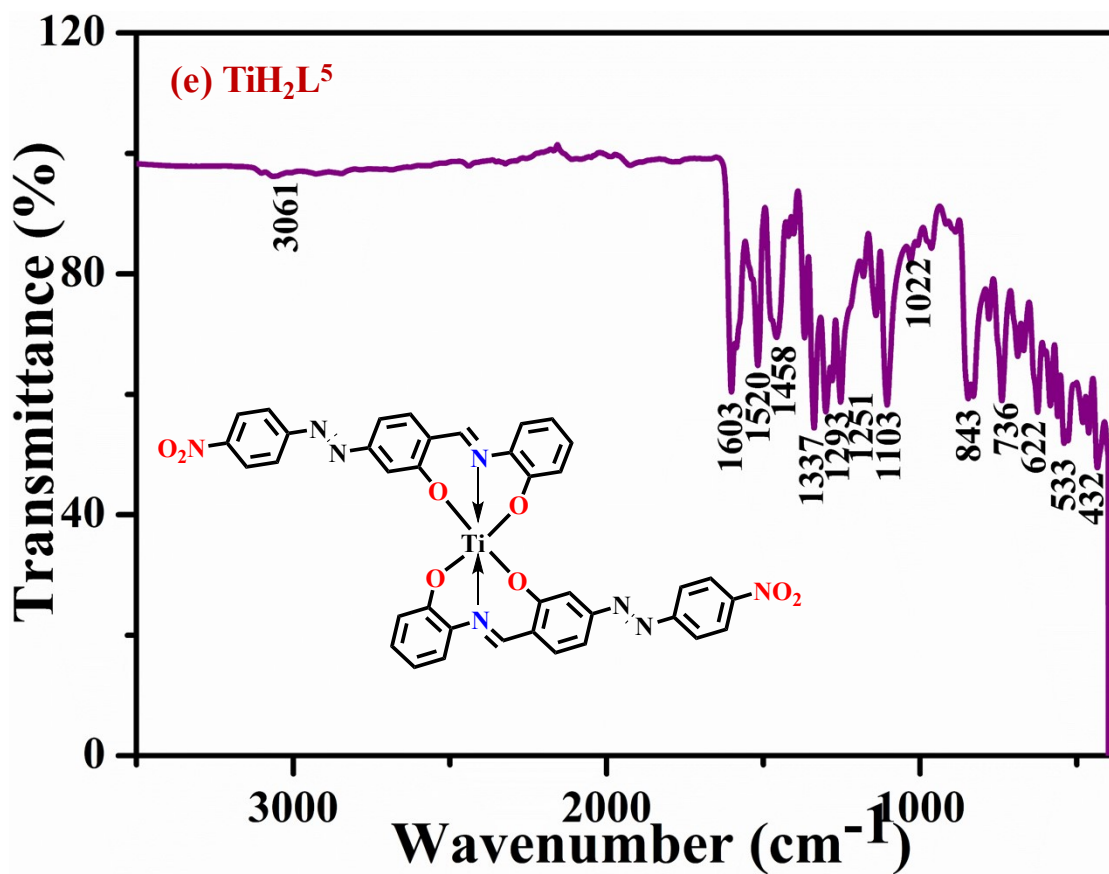

**Fig. S12** FTIR Spectra of titanium(IV) complexes: (a)  $TiH_2L^1$ , (b)  $TiH_2L^2$ , (c)  $TiH_2L^3$ , (d)  $TiH_2L^4$  and (e)  $TiH_2L^5$

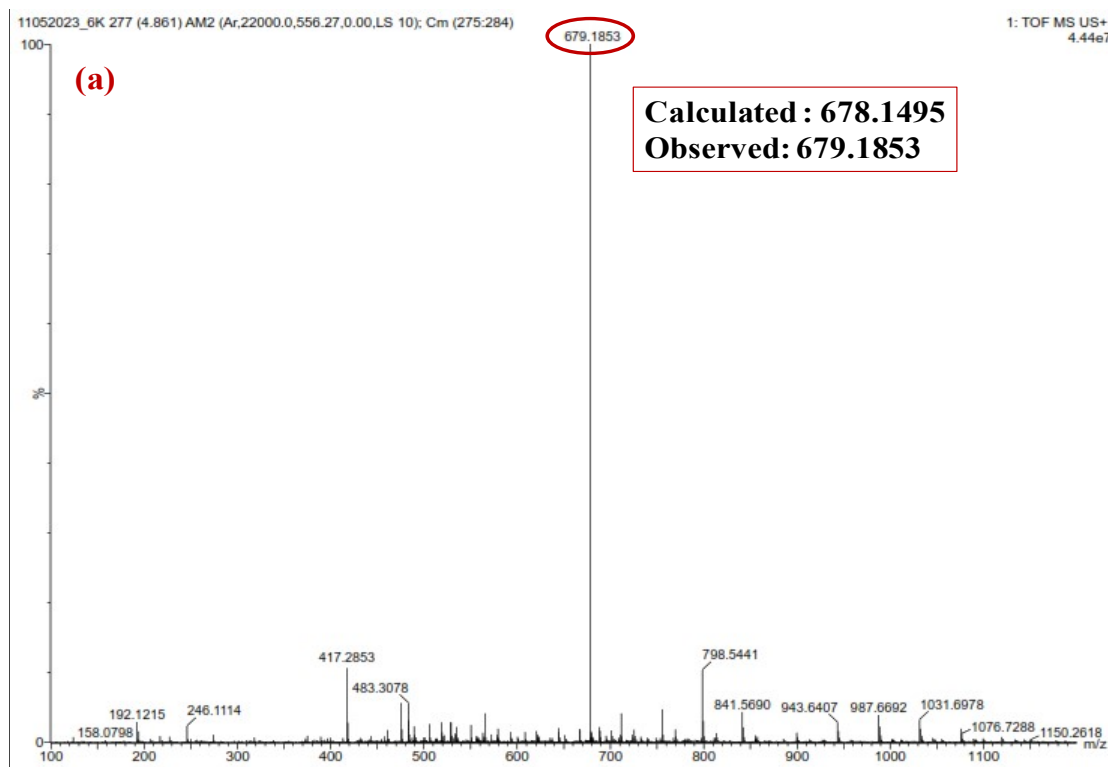

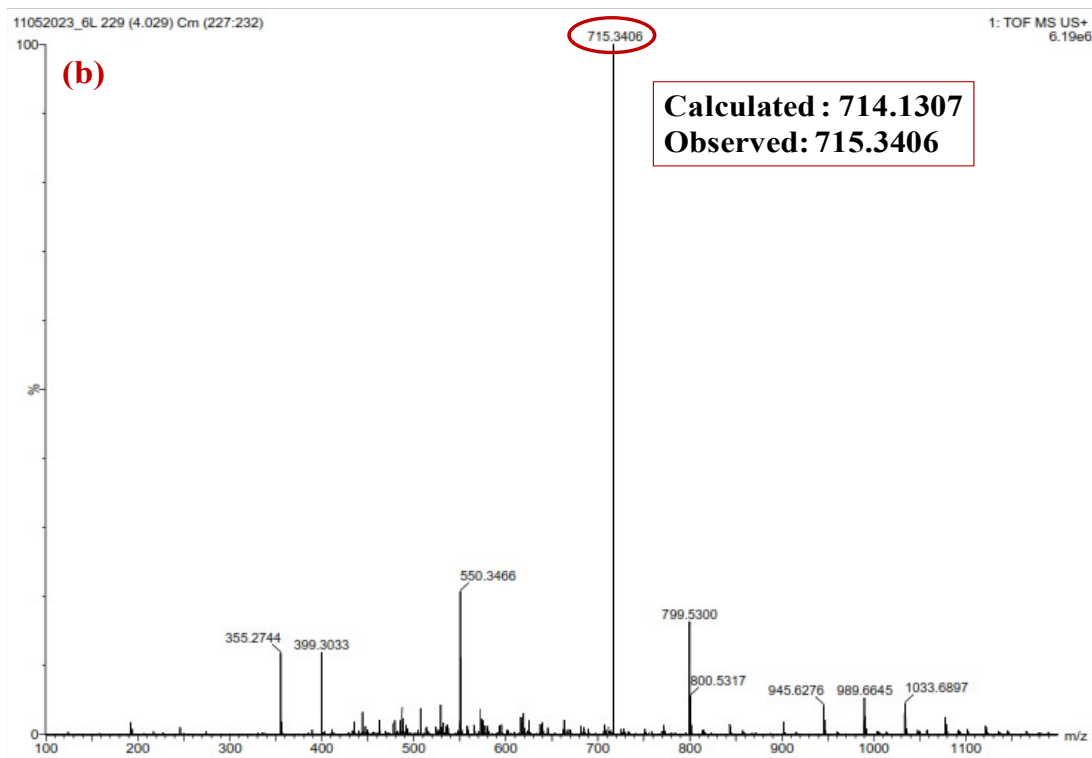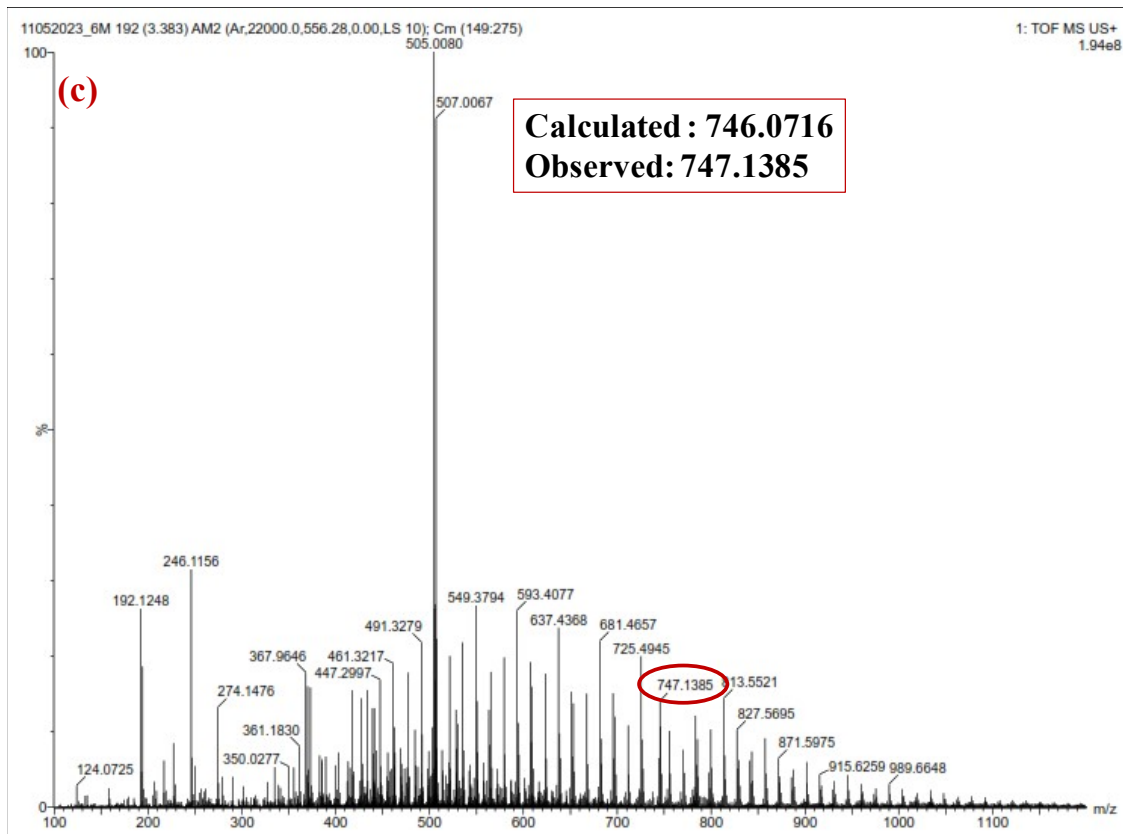



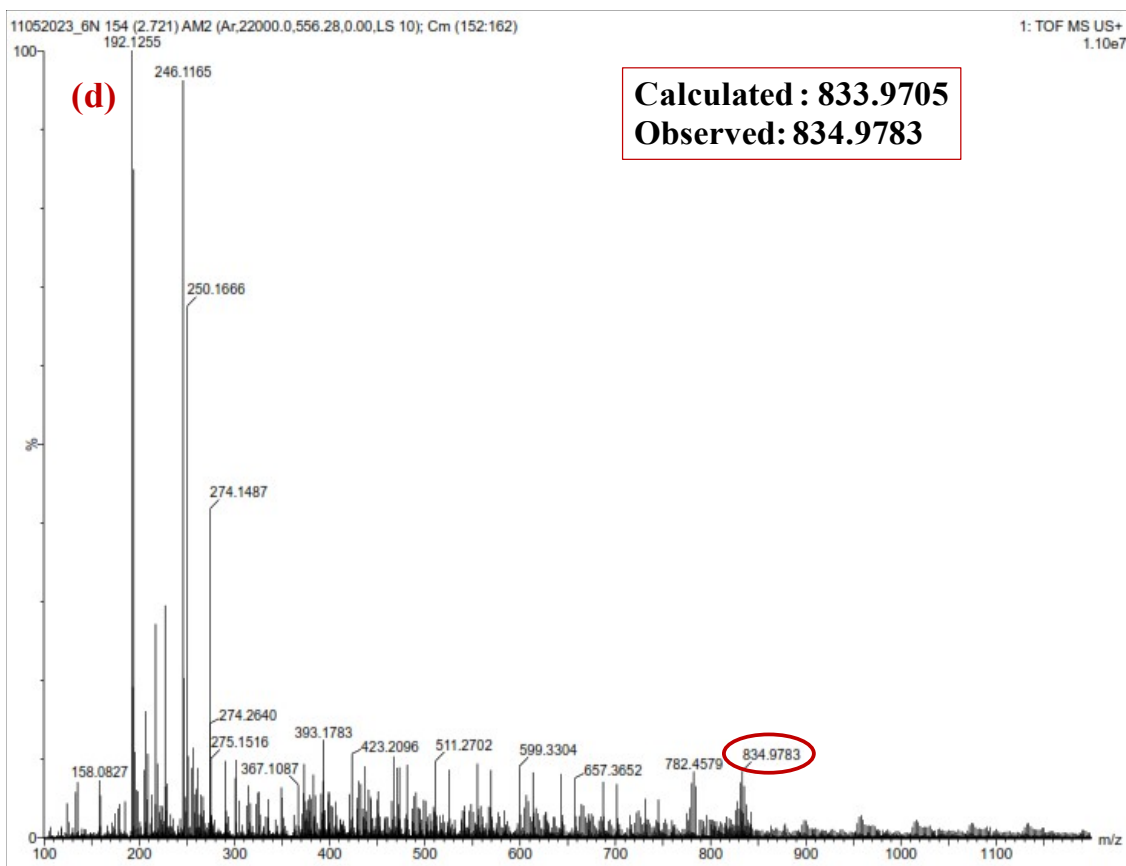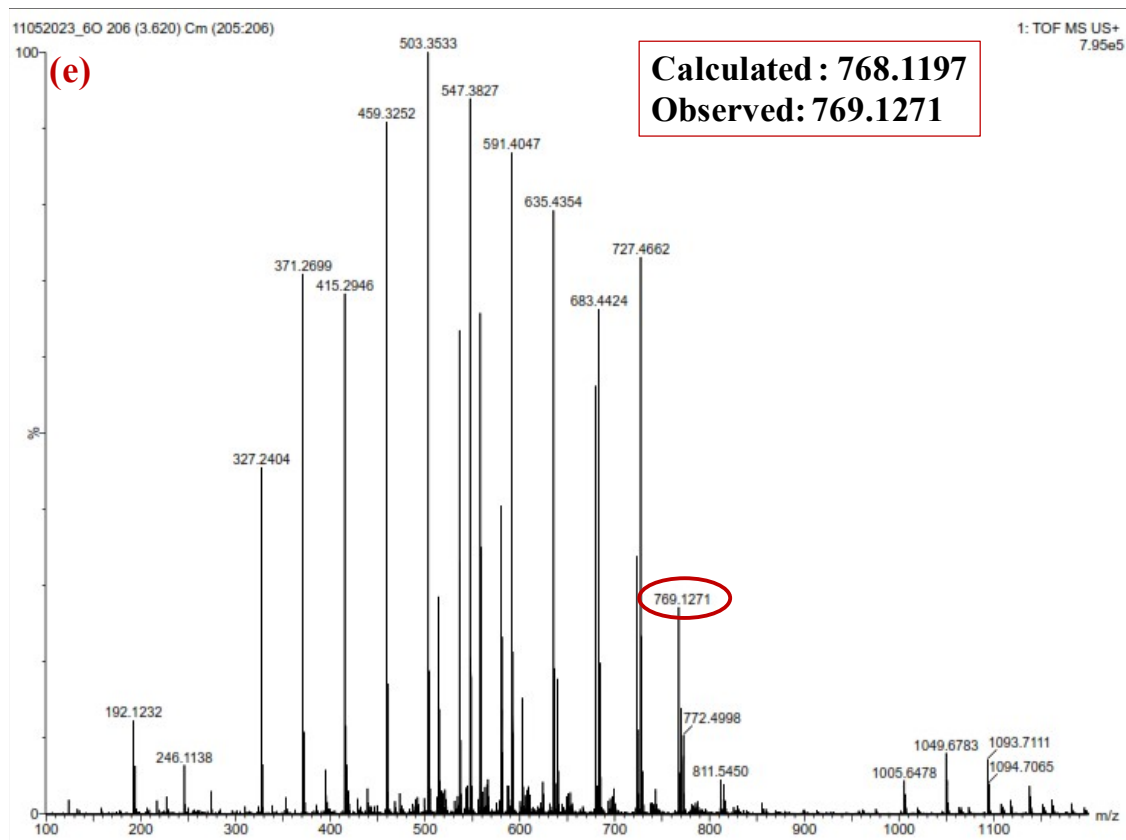

**Fig. S13** HRMS of titanium(IV) complexes: **(a)**  $TiH_2L^1$ , **(b)**  $TiH_2L^2$ , **(c)**  $TiH_2L^3$ , **(d)**  $TiH_2L^4$  and **(e)**  $TiH_2L^5$

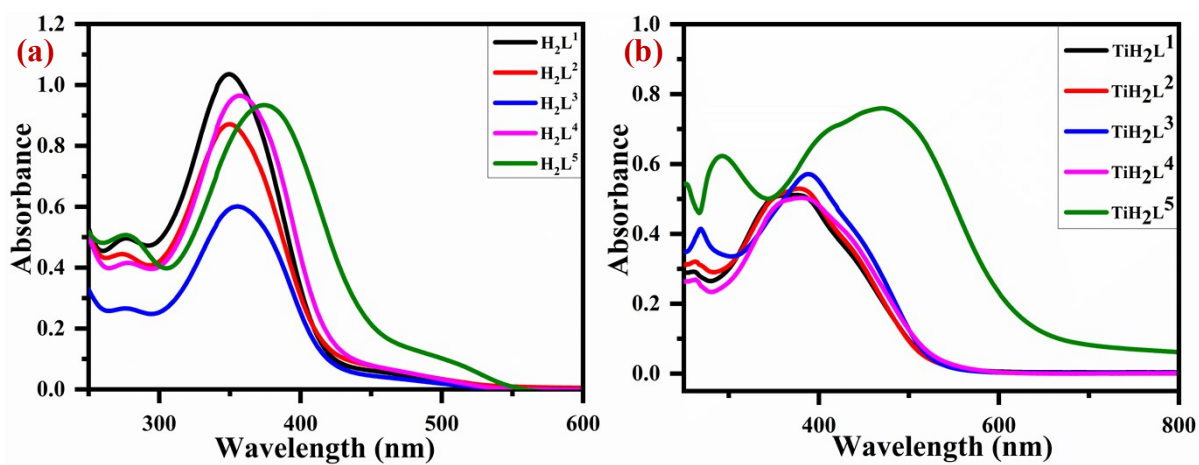

Fig. S14 UV-Visible Spectra: (a) ligands ( $H_2L^1$ - $H_2L^5$ ) and (b) complexes ( $TiH_2L^1$ - $TiH_2L^5$ )

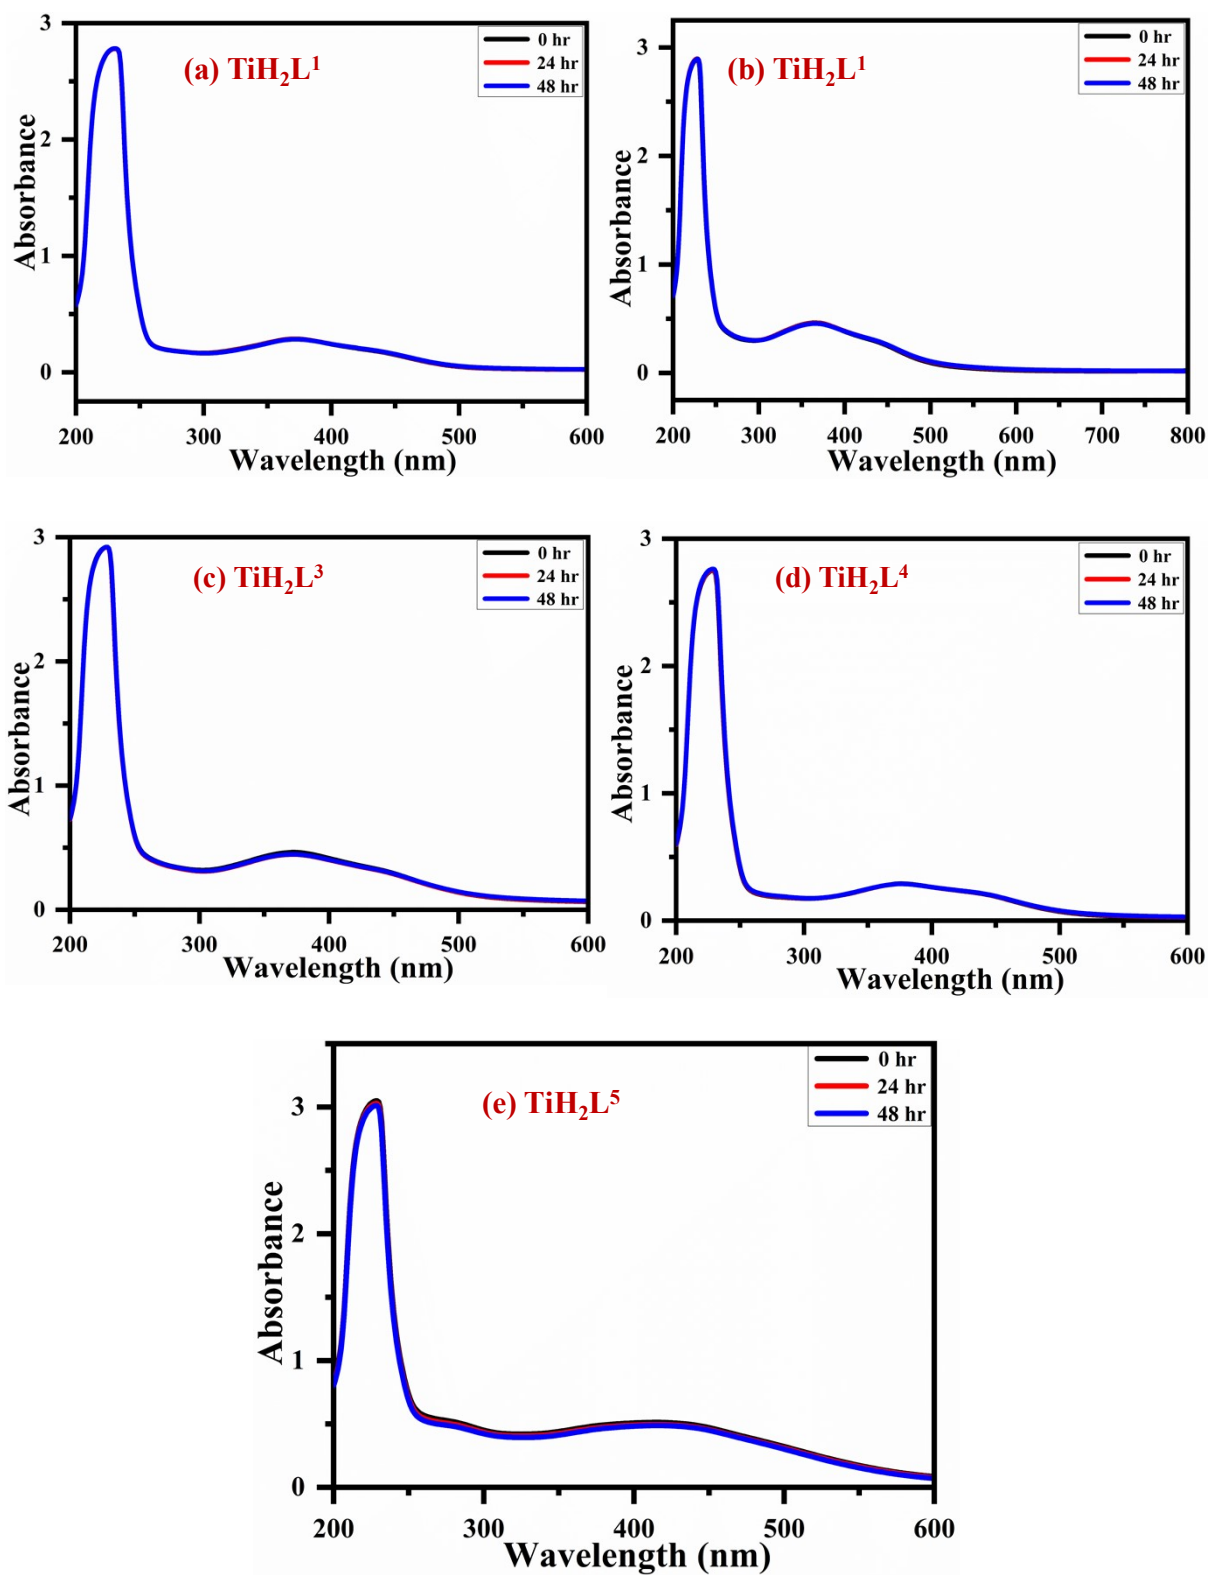

**Fig. S15** UV-Visible stability spectra in 10% DMSO: **(a)** TiH<sub>2</sub>L<sup>1</sup>, **(b)** TiH<sub>2</sub>L<sup>2</sup>, **(c)** TiH<sub>2</sub>L<sup>3</sup>, **(d)** TiH<sub>2</sub>L<sup>4</sup> and **(e)** TiH<sub>2</sub>L<sup>5</sup>

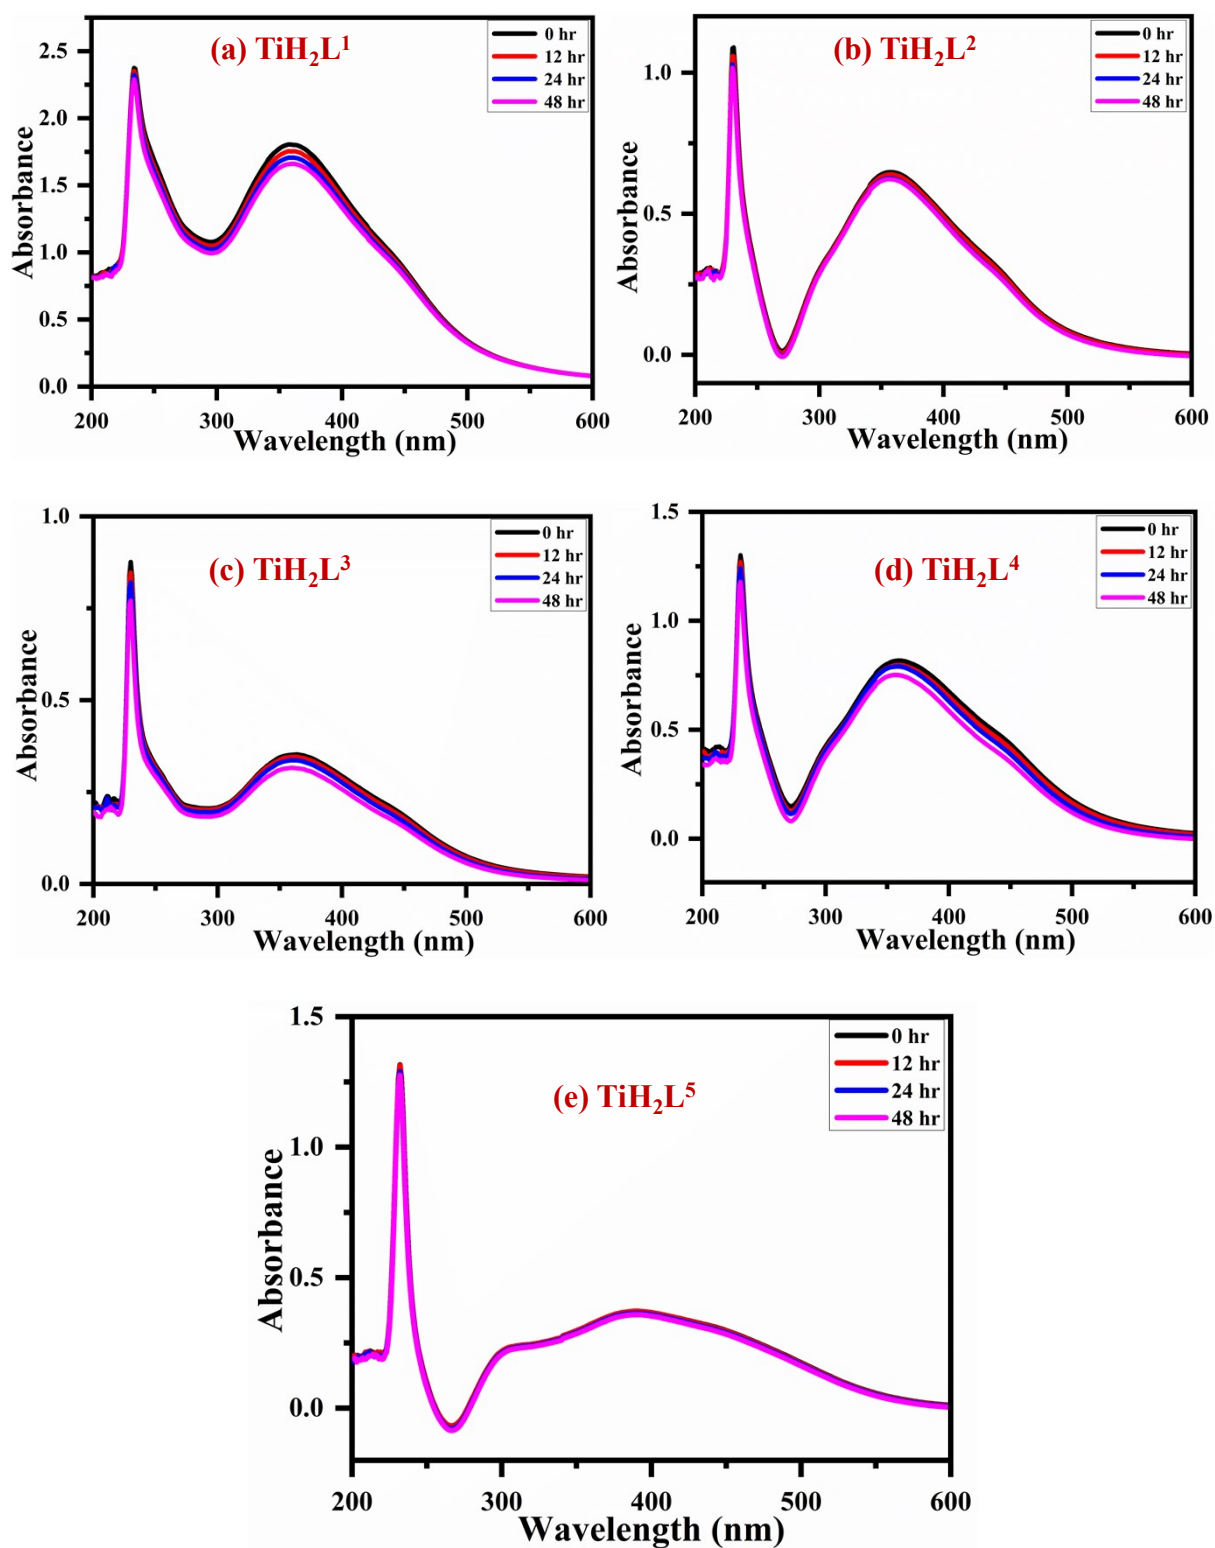

**Fig. S16** Stability studies of titanium(IV) complexes: (a)  $\text{TiH}_2\text{L}^1$ , (b)  $\text{TiH}_2\text{L}^2$ , (c)  $\text{TiH}_2\text{L}^3$ , (d)  $\text{TiH}_2\text{L}^4$  and (e)  $\text{TiH}_2\text{L}^5$  in GSH medium

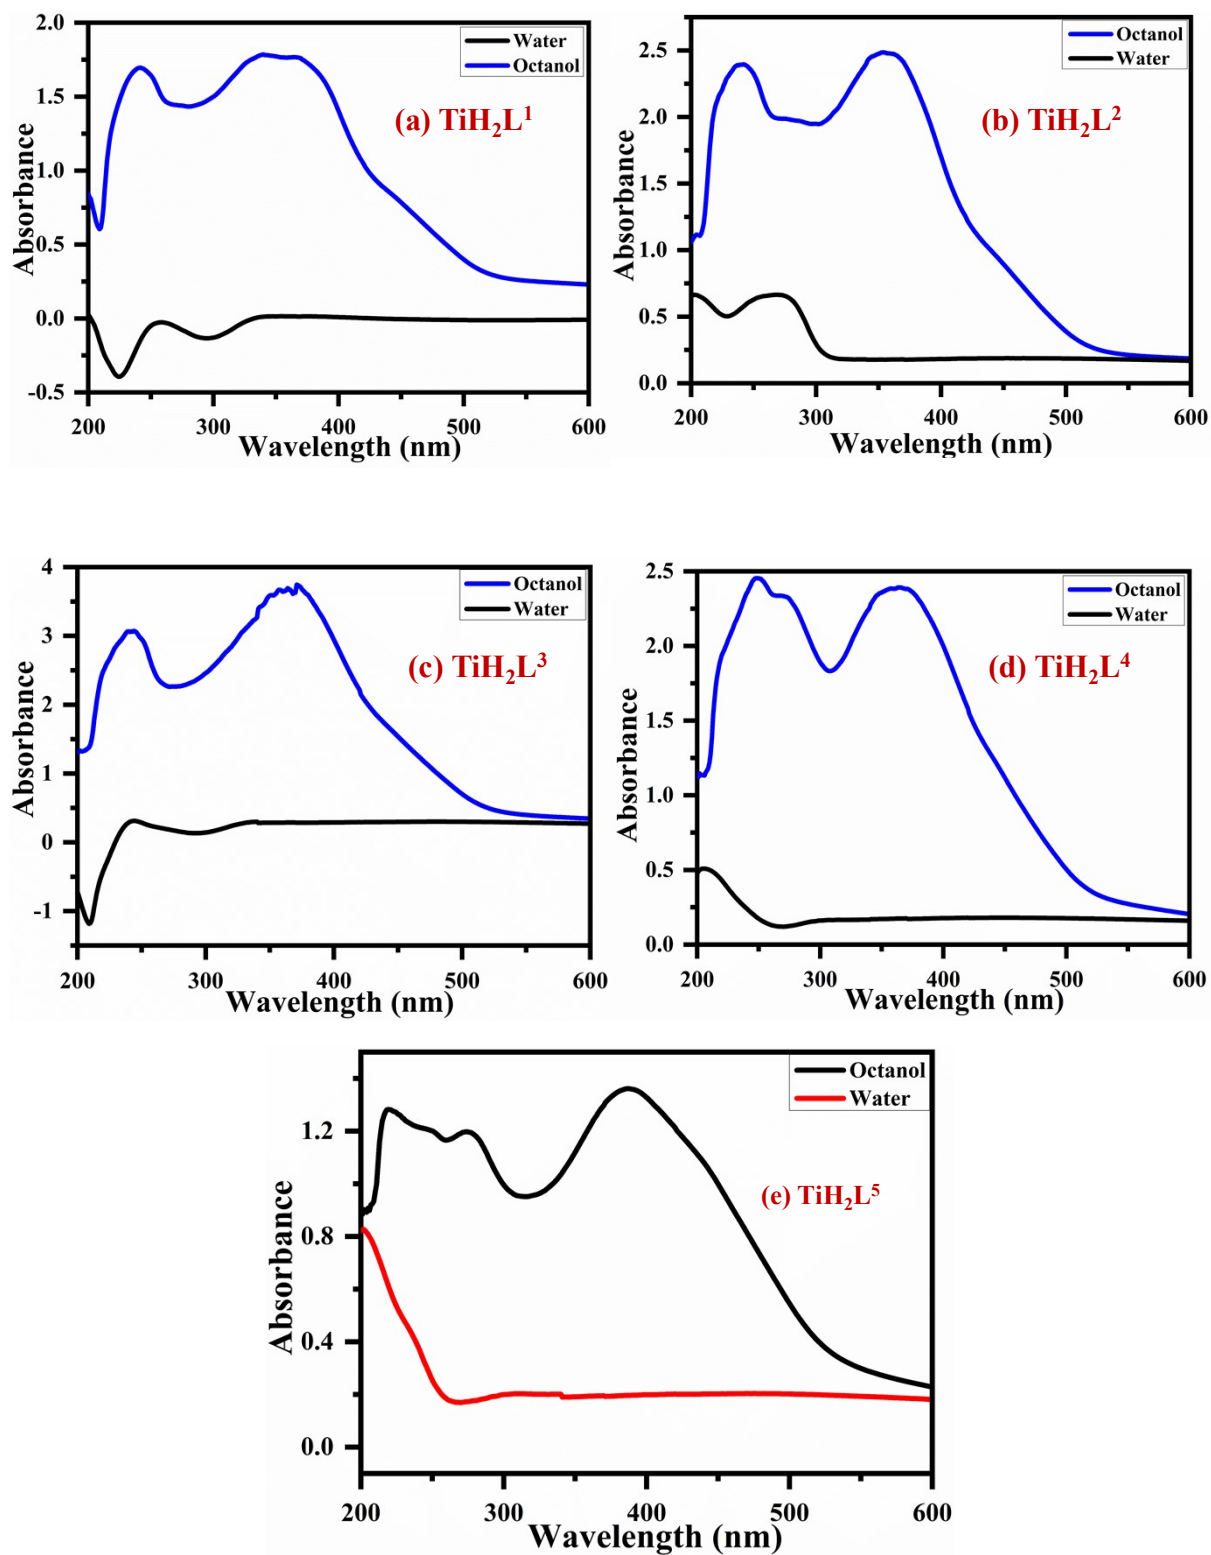

**Fig. S17** UV-Visible studies of titanium(IV) complexes: (a)  $TiH_2L^1$ , (b)  $TiH_2L^2$ , (c)  $TiH_2L^3$ , (d)  $TiH_2L^4$  and (e)  $TiH_2L^5$  in water and octanol

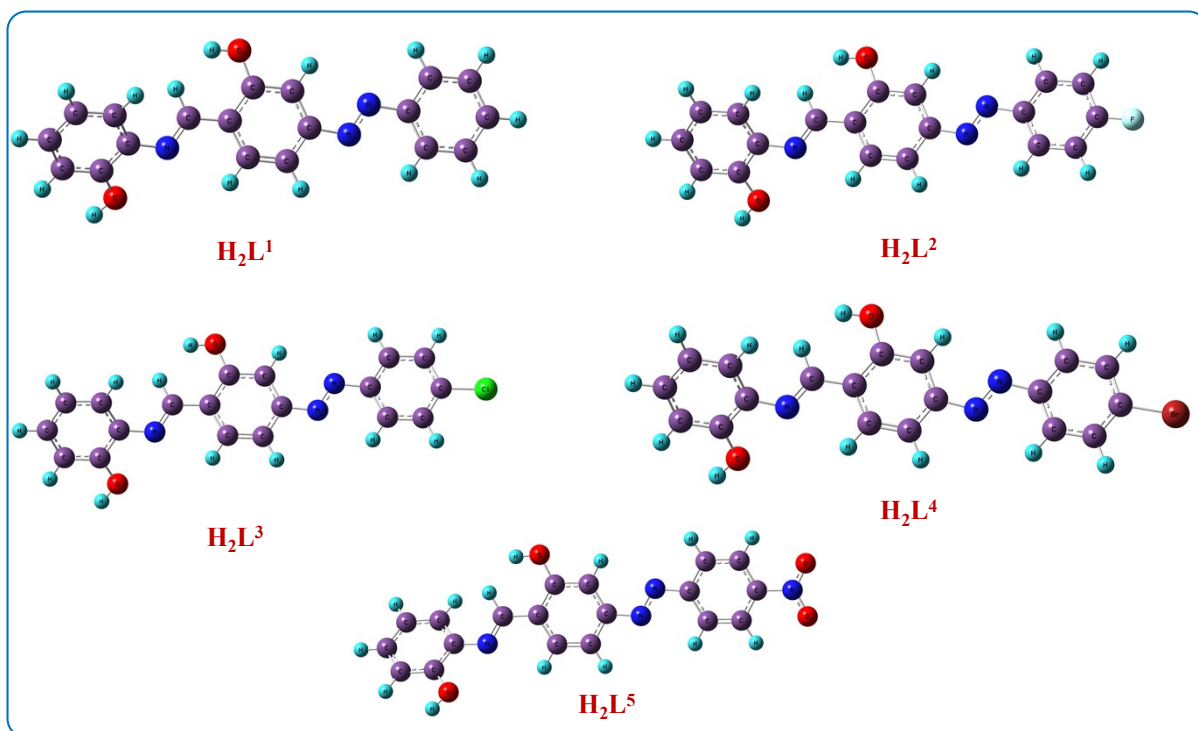

**Fig. S18** Optimized molecular geometry of free ligand ( $H_2L^1$ - $H_2L^5$ ) by using the DFT/B3LYP method

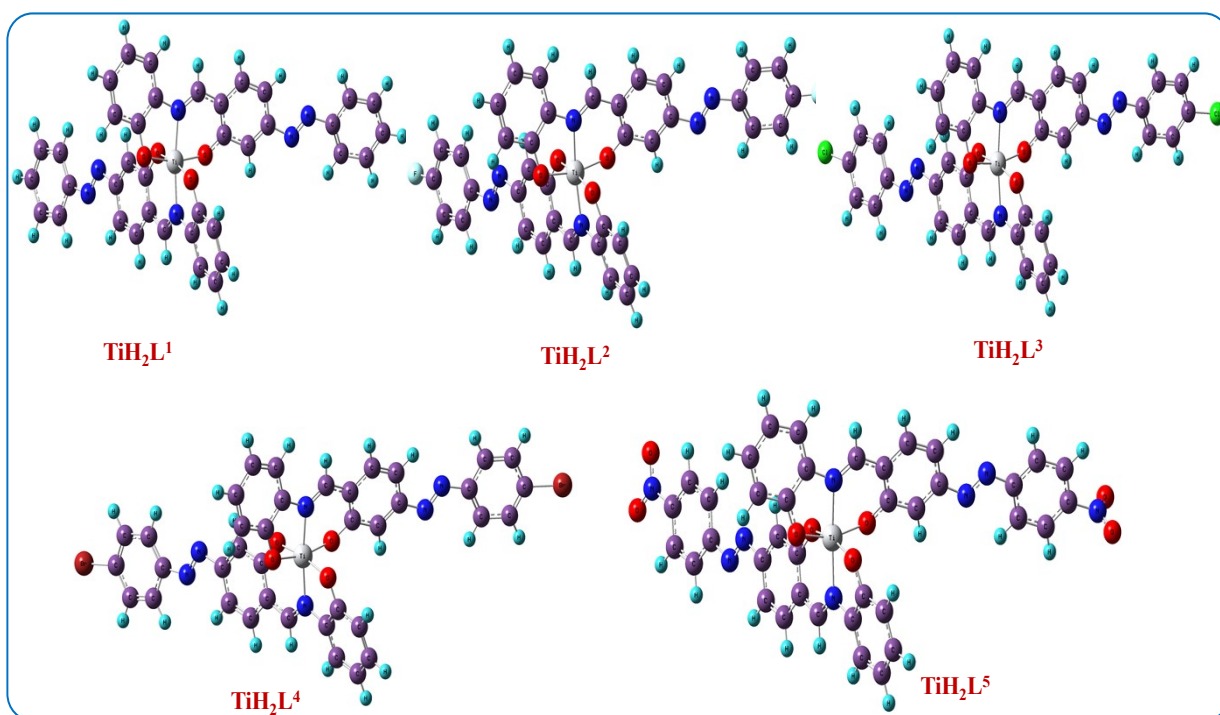

**Fig. S19** Optimized molecular geometry of  $TiH_2L^1$ - $TiH_2L^5$  by DFT/B3LYP method

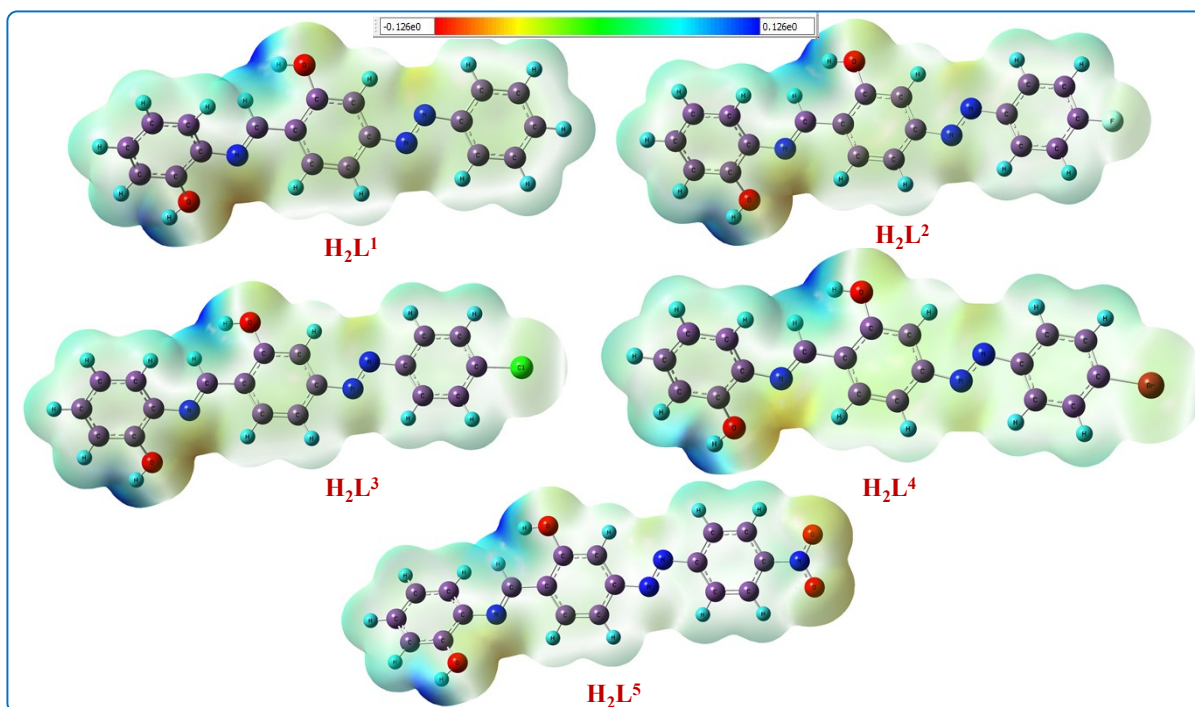

**Fig. S20** Electrostatic potential mapped on the surface of optimized molecular geometries of free ligands by DFT/B3LYP method

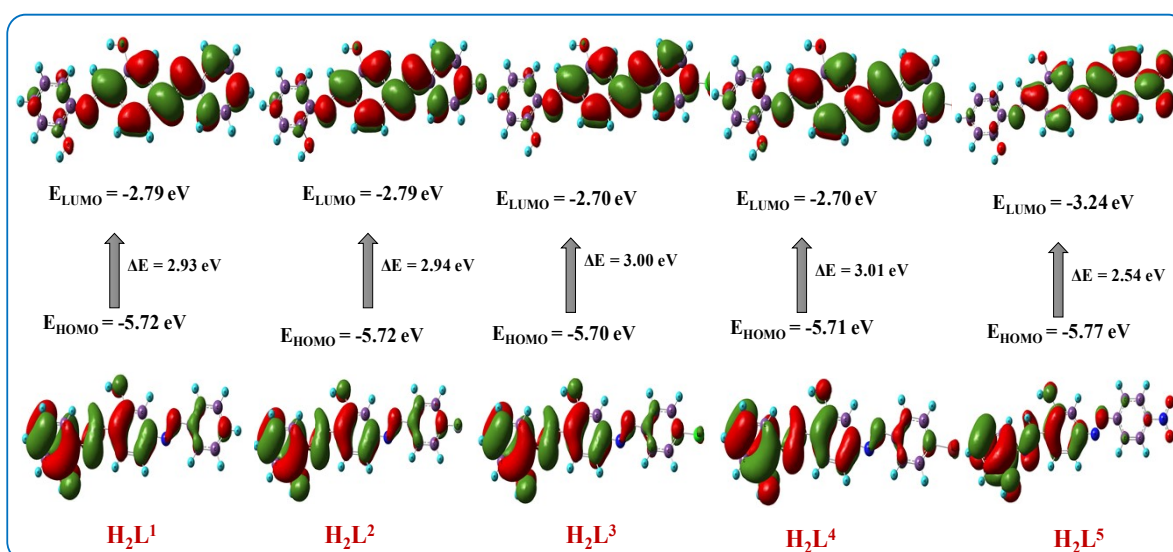

**Fig. S21** FMOs of free ligand ( $\text{H}_2\text{L}^1$ - $\text{TiH}_2\text{L}^5$ ) by using DFT/B3LYP method

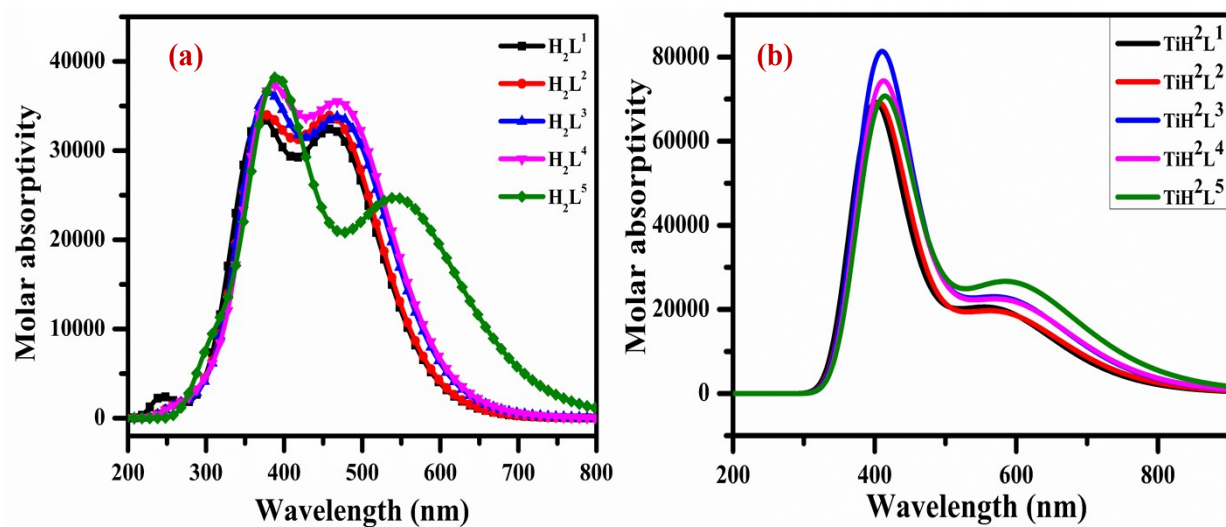

Fig. S22 TD-DFT spectra: (a)  $H_2L^1$ - $H_2L^5$  for ligands and (b)  $TiH_2L^1$ - $TiH_2L^5$  in aqueous phase



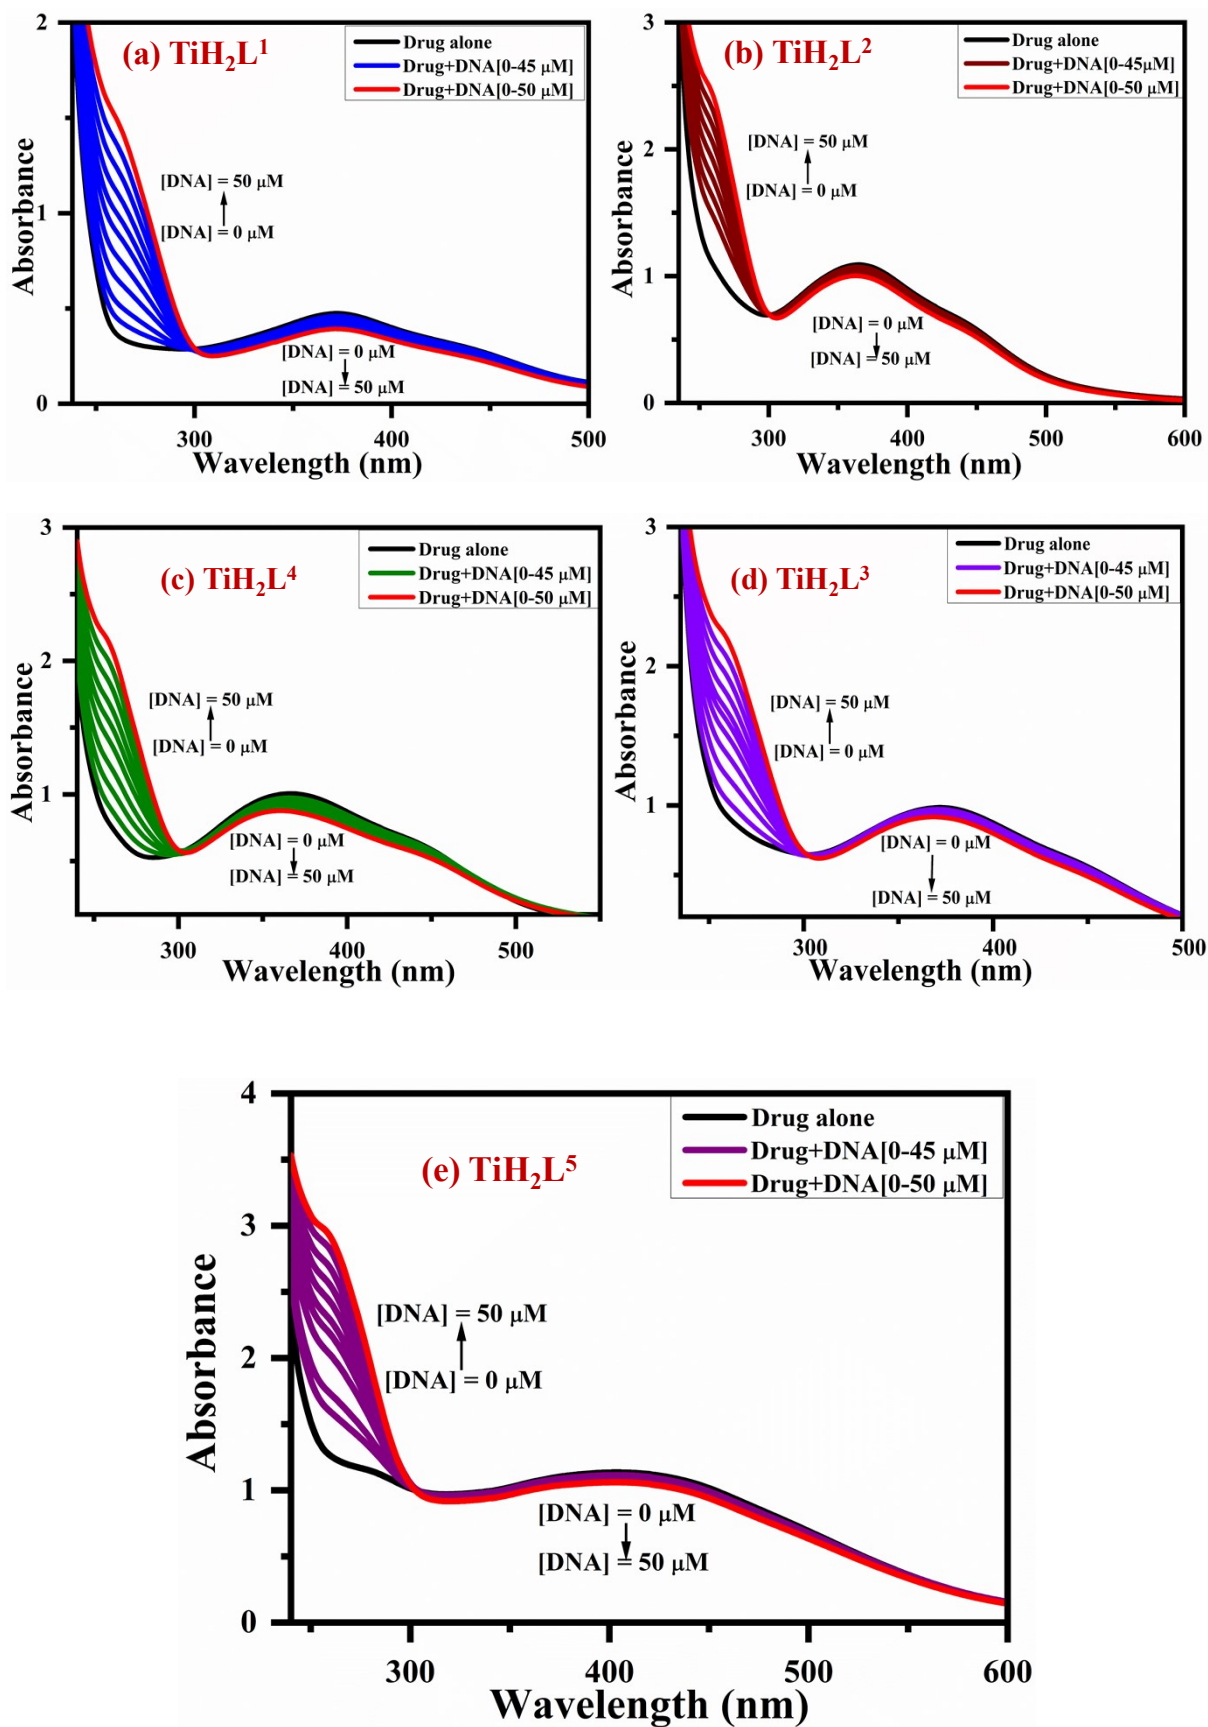

**Fig. S23** DNA binding plots of all the five titanium(IV) derivatives: **(a)**  $\text{TiH}_2\text{L}^1$ , **(b)**  $\text{TiH}_2\text{L}^2$ , **(c)**  $\text{TiH}_2\text{L}^3$ , **(d)**  $\text{TiH}_2\text{L}^4$  and **(e)**  $\text{TiH}_2\text{L}^5$

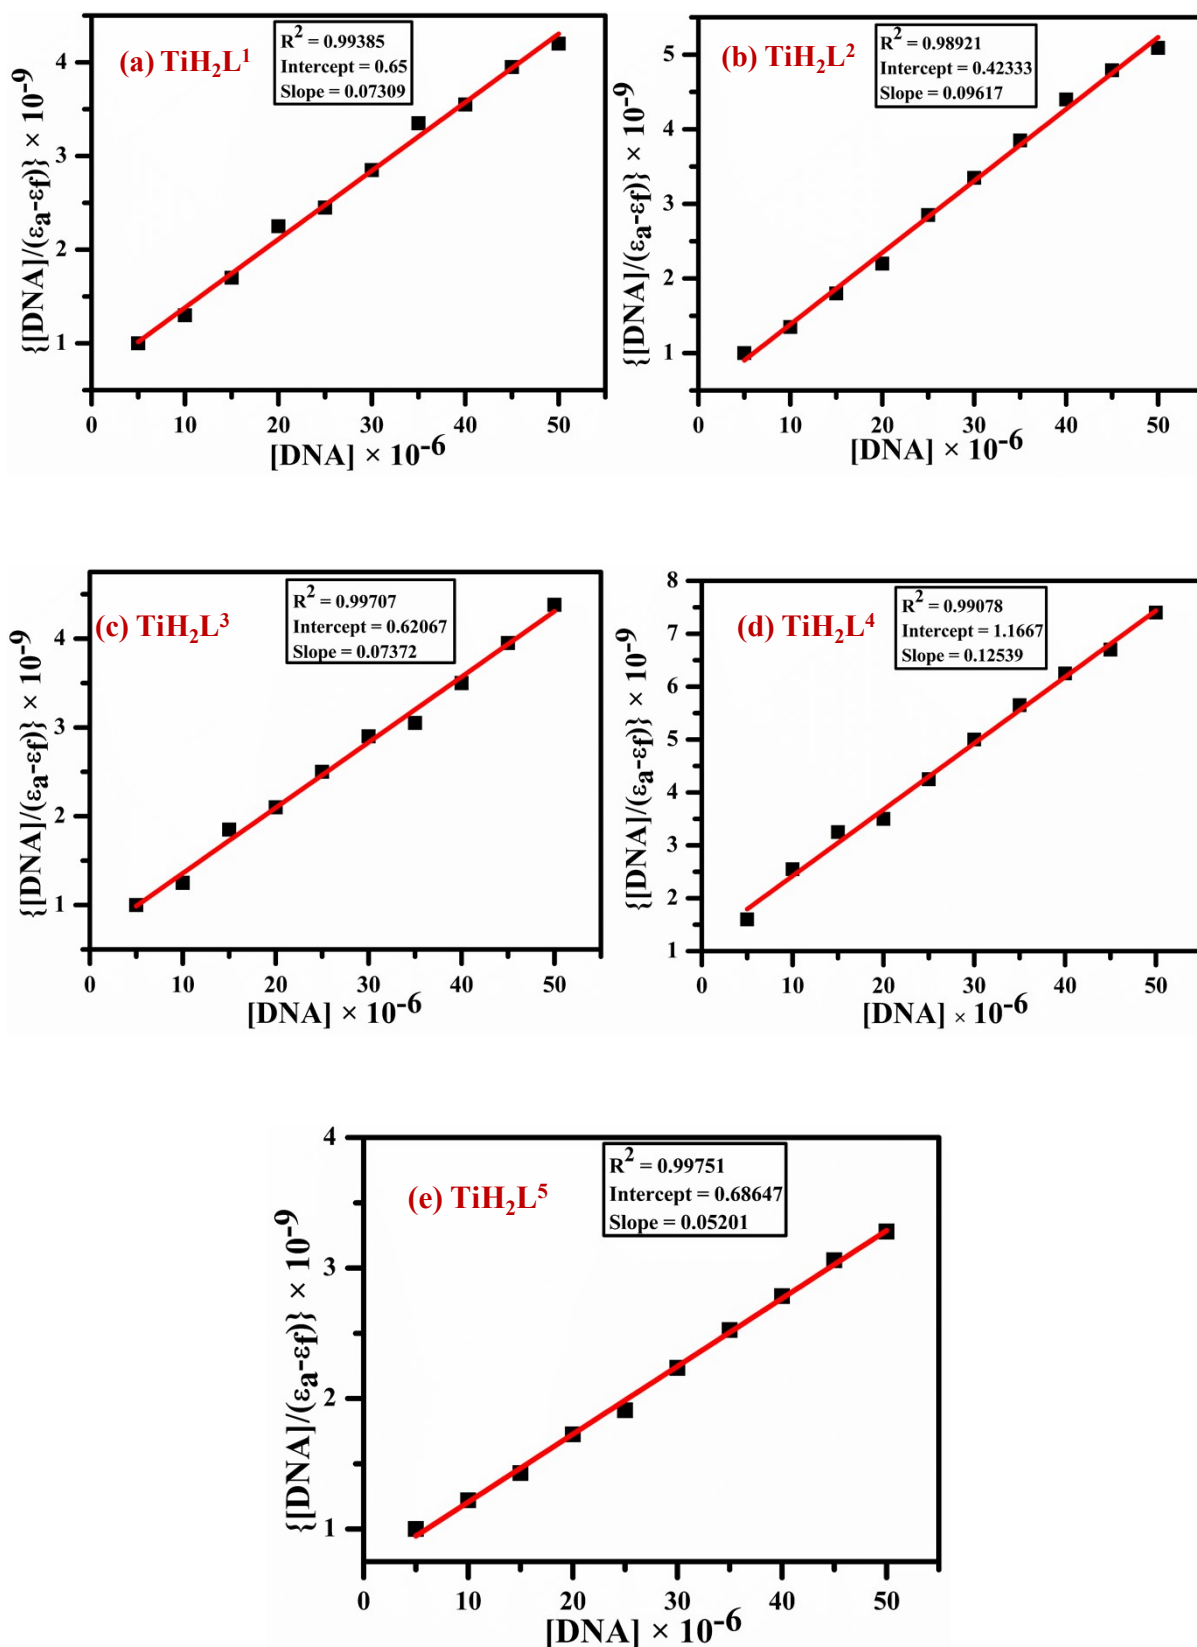

Fig. S24  $\{[DNA]/(\epsilon_a - \epsilon_f)\}$  vs  $[DNA]$  linear plots of all the five complexes: (a)  $TiH_2L^1$ , (b)  $TiH_2L^2$ , (c)  $TiH_2L^3$ , (d)  $TiH_2L^4$  and (e)  $TiH_2L^5$

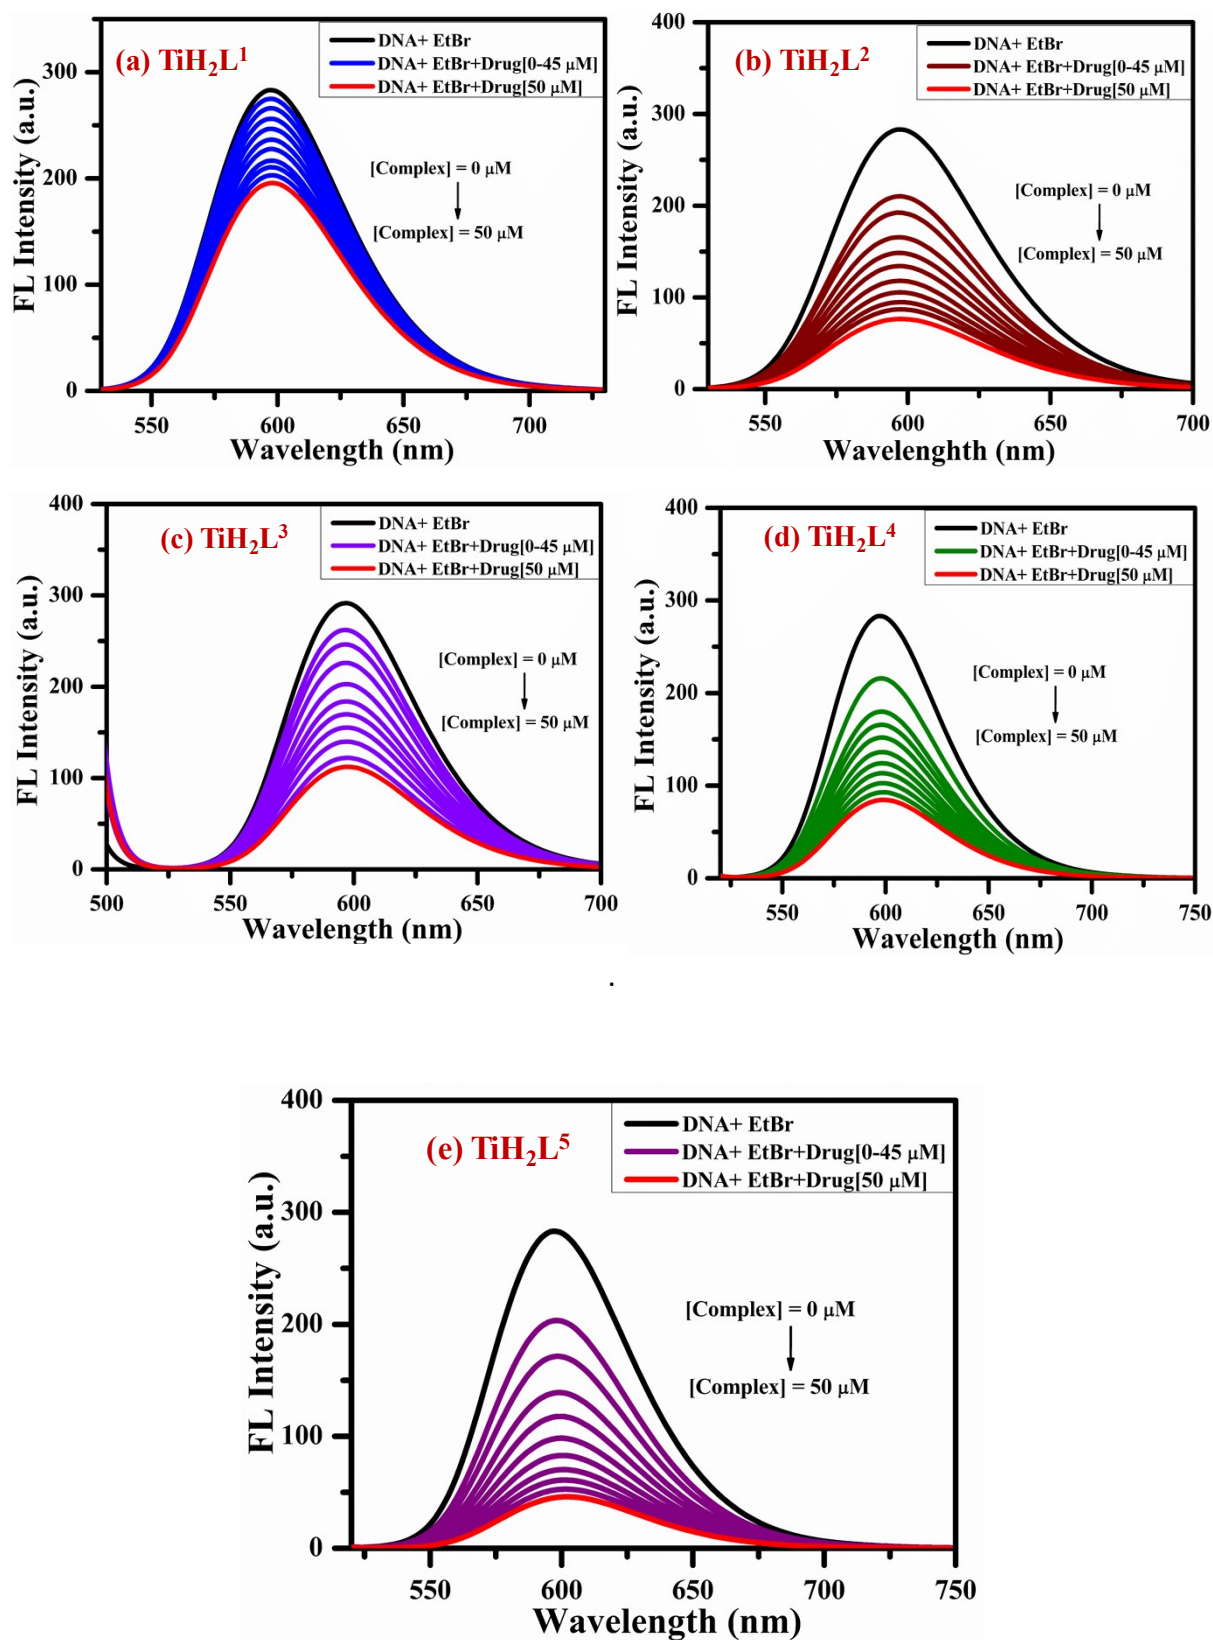

**Fig. S25** Fluorescence quenching of EtBr-DNA with titanium(IV) complexes: (a)  $\text{TiH}_2\text{L}^1$ , (b)  $\text{TiH}_2\text{L}^2$ , (c)  $\text{TiH}_2\text{L}^3$ , (d)  $\text{TiH}_2\text{L}^4$  and (e)  $\text{TiH}_2\text{L}^5$

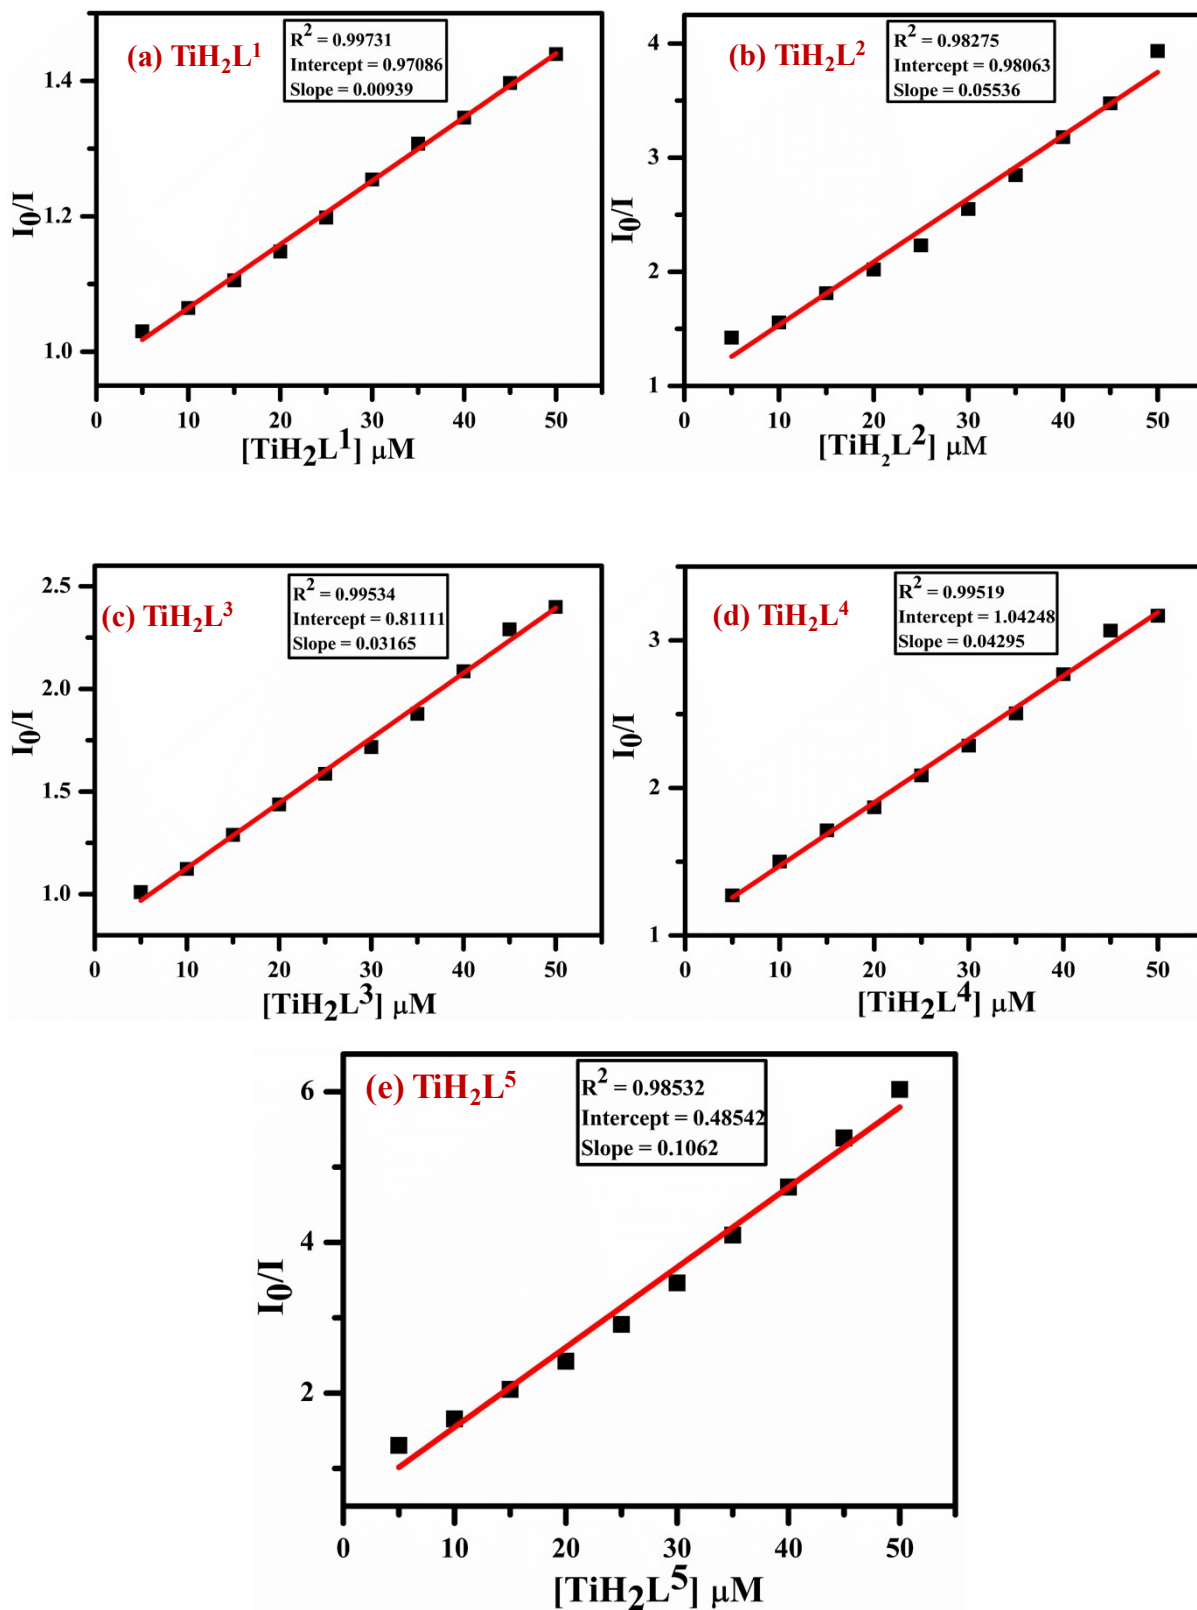

Fig. S26 CT-DNA intercalation Stern-Volmer plot of  $I_0/I$  vs concentration of titanium(IV) complexes: (a)  $\text{TiH}_2\text{L}^1$ , (b)  $\text{TiH}_2\text{L}^2$ , (c)  $\text{TiH}_2\text{L}^3$ , (d)  $\text{TiH}_2\text{L}^4$  and (e)  $\text{TiH}_2\text{L}^5$

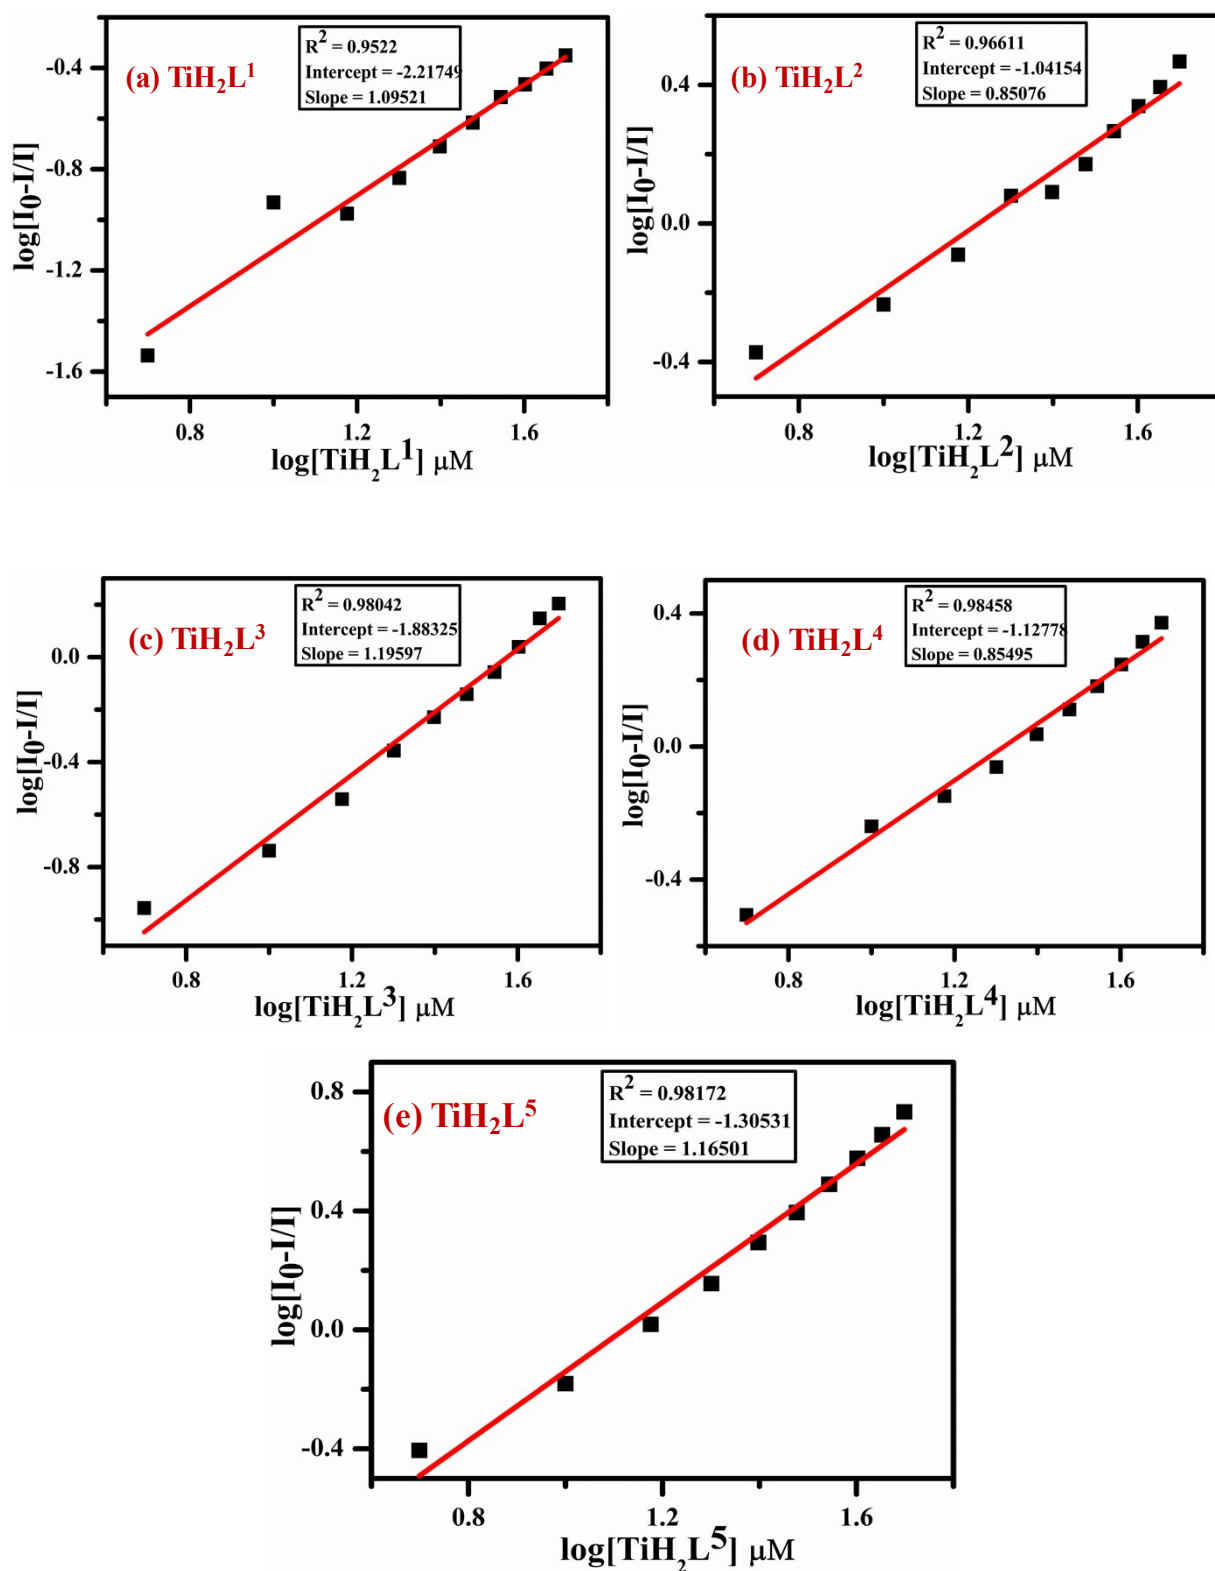

**Fig. S27** Scatchard plot of  $\log\left[\frac{I_0 - I}{I}\right]$  vs  $\log[\text{complex}]$  for CT-DNA with presence of titanium(IV) derivatives: (a)  $\text{TiH}_2\text{L}^1$ , (b)  $\text{TiH}_2\text{L}^2$ , (c)  $\text{TiH}_2\text{L}^3$ , (d)  $\text{TiH}_2\text{L}^4$  and (e)  $\text{TiH}_2\text{L}^5$

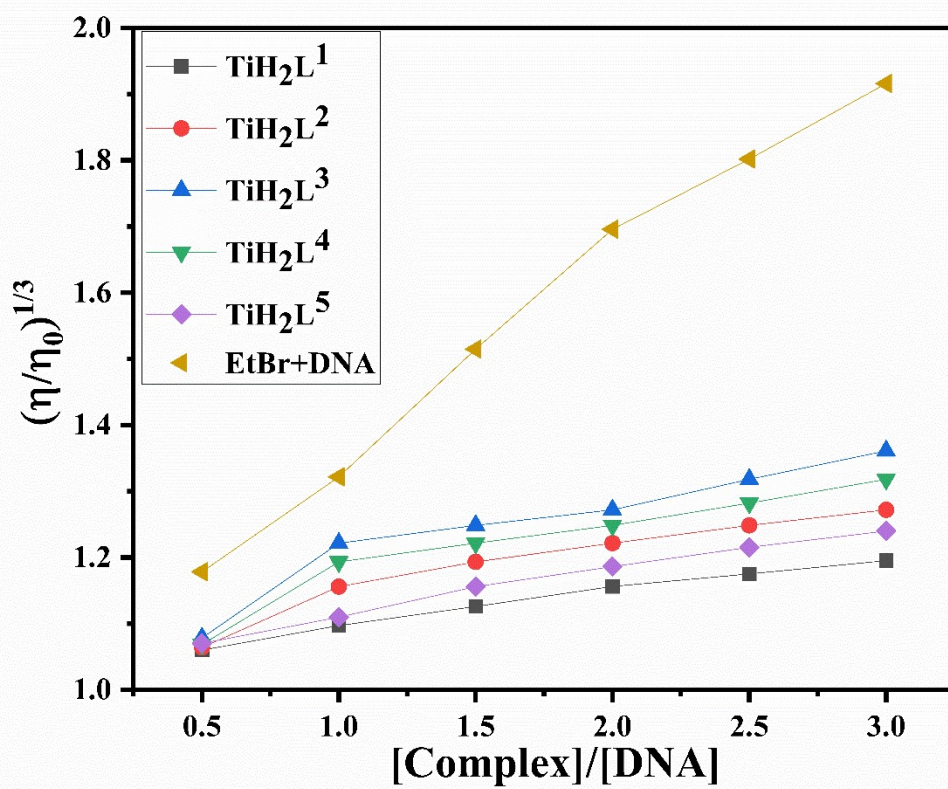

**Fig. S28** Relative viscosity of CT-DNA interaction with EtBr and titanium(IV) derivatives ( $\text{TiH}_2\text{L}^1$ - $\text{TiH}_2\text{L}^5$ )

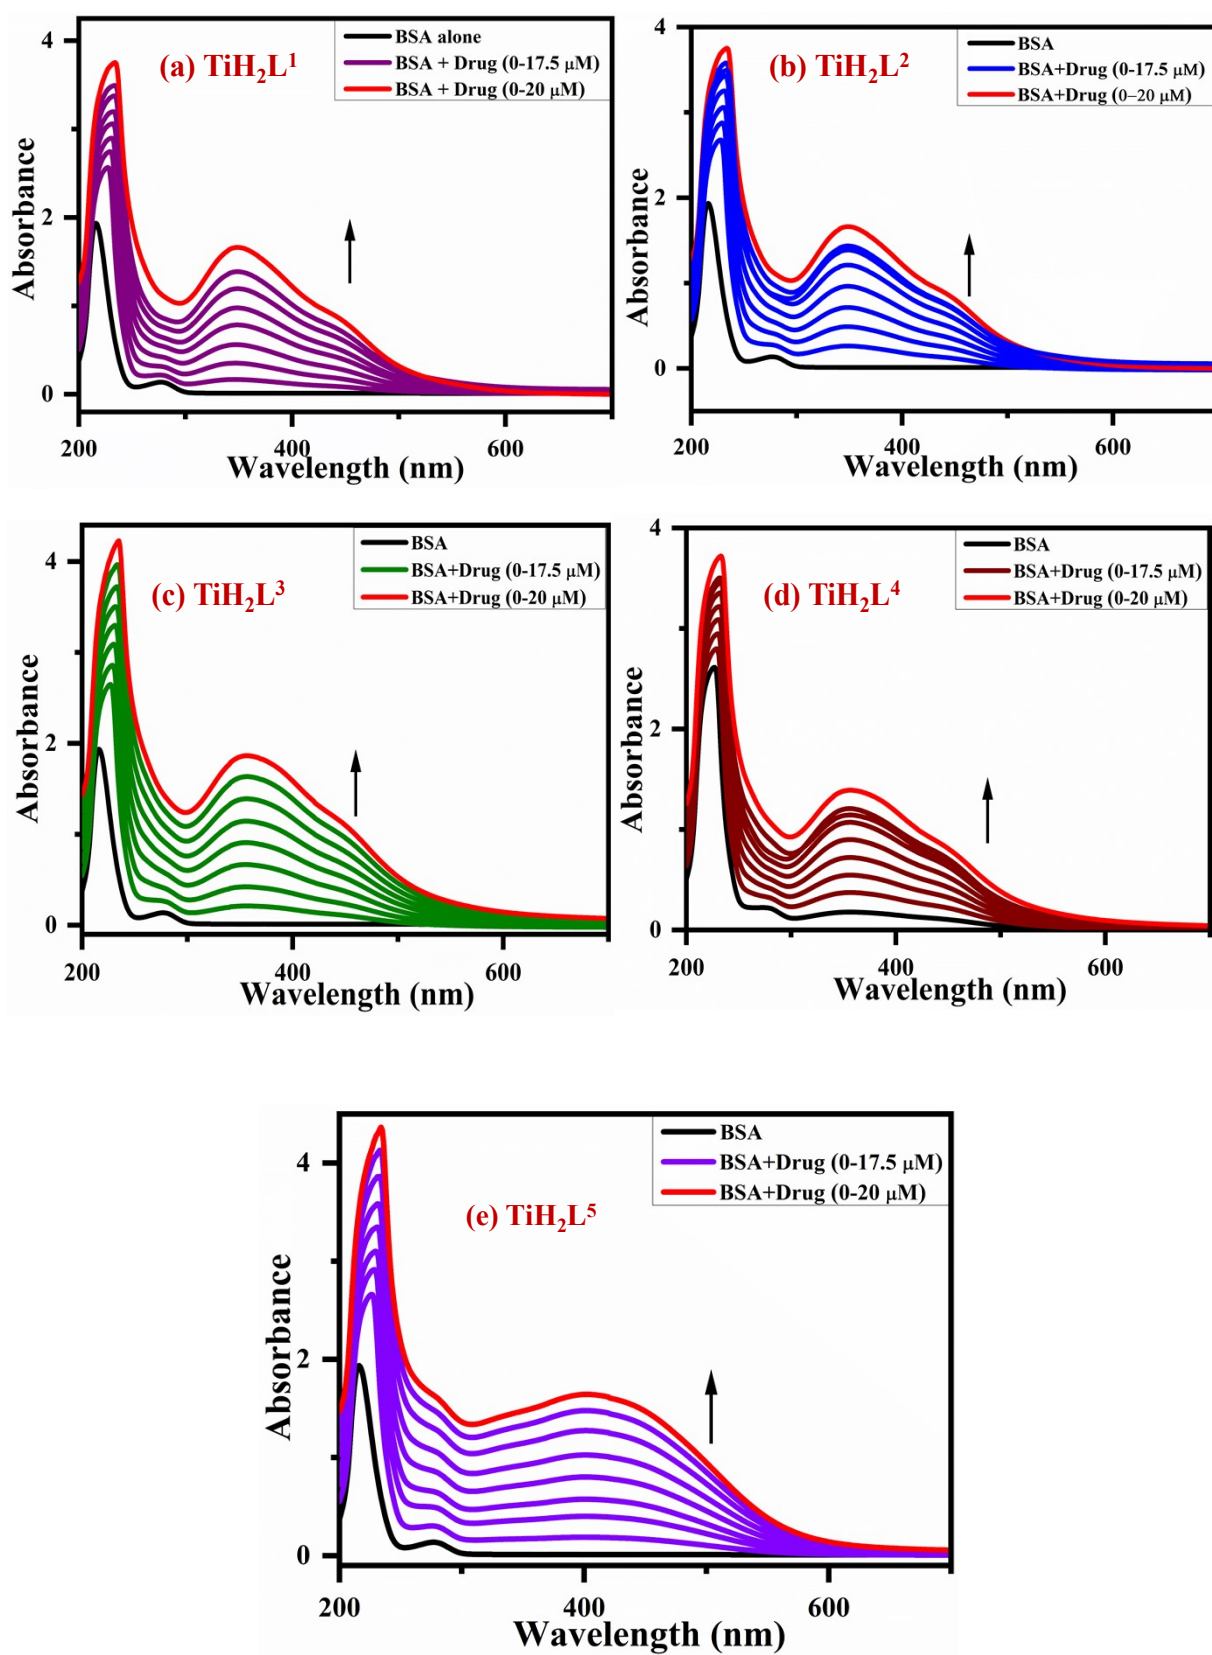

**Fig. S29** BSA binding plots of all the five titanium(IV) derivatives: (a)  $\text{TiH}_2\text{L}^1$ , (b)  $\text{TiH}_2\text{L}^2$ , (c)  $\text{TiH}_2\text{L}^3$ , (d)  $\text{TiH}_2\text{L}^4$  and (e)  $\text{TiH}_2\text{L}^5$

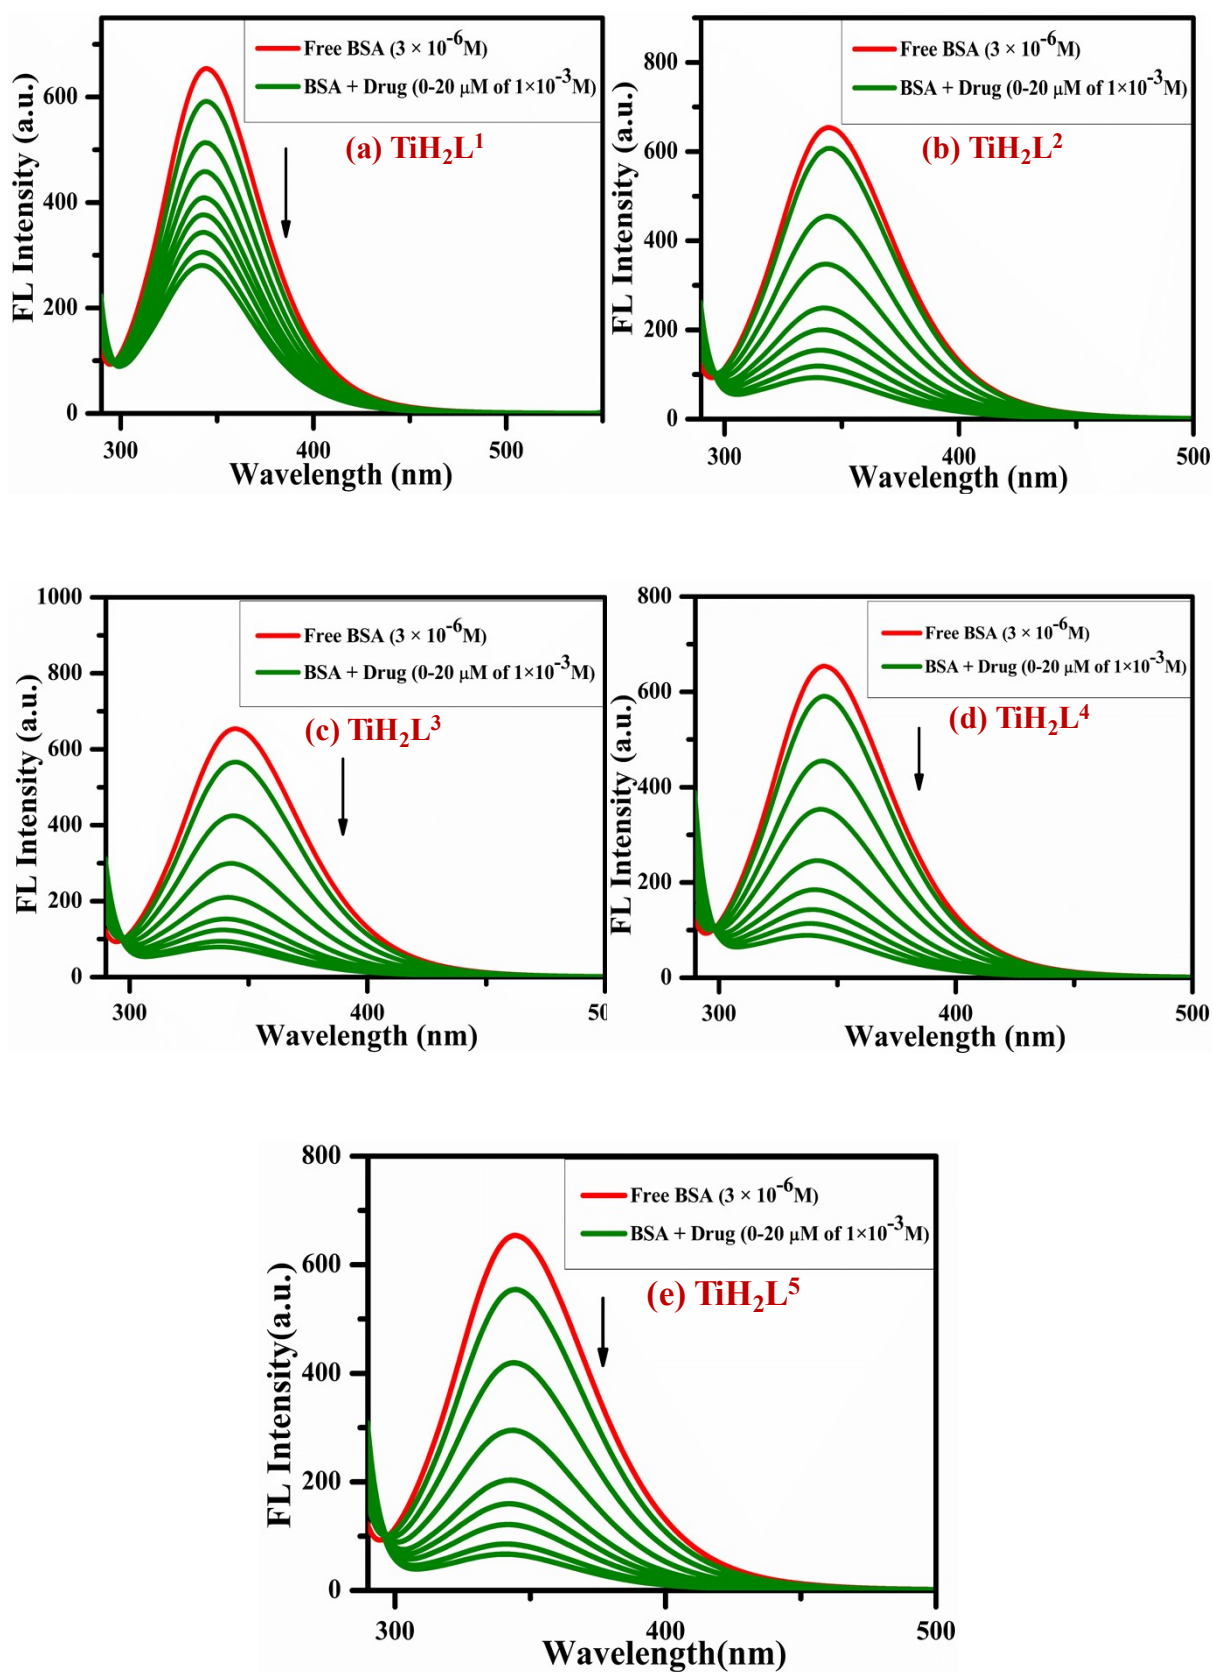

**Fig. S30** Fluorescence quenching plot for BSA of all the five titanium(IV) derivatives: (a)  $\text{TiH}_2\text{L}^1$ , (b)  $\text{TiH}_2\text{L}^2$ , (c)  $\text{TiH}_2\text{L}^3$ , (d)  $\text{TiH}_2\text{L}^4$  and (e)  $\text{TiH}_2\text{L}^5$



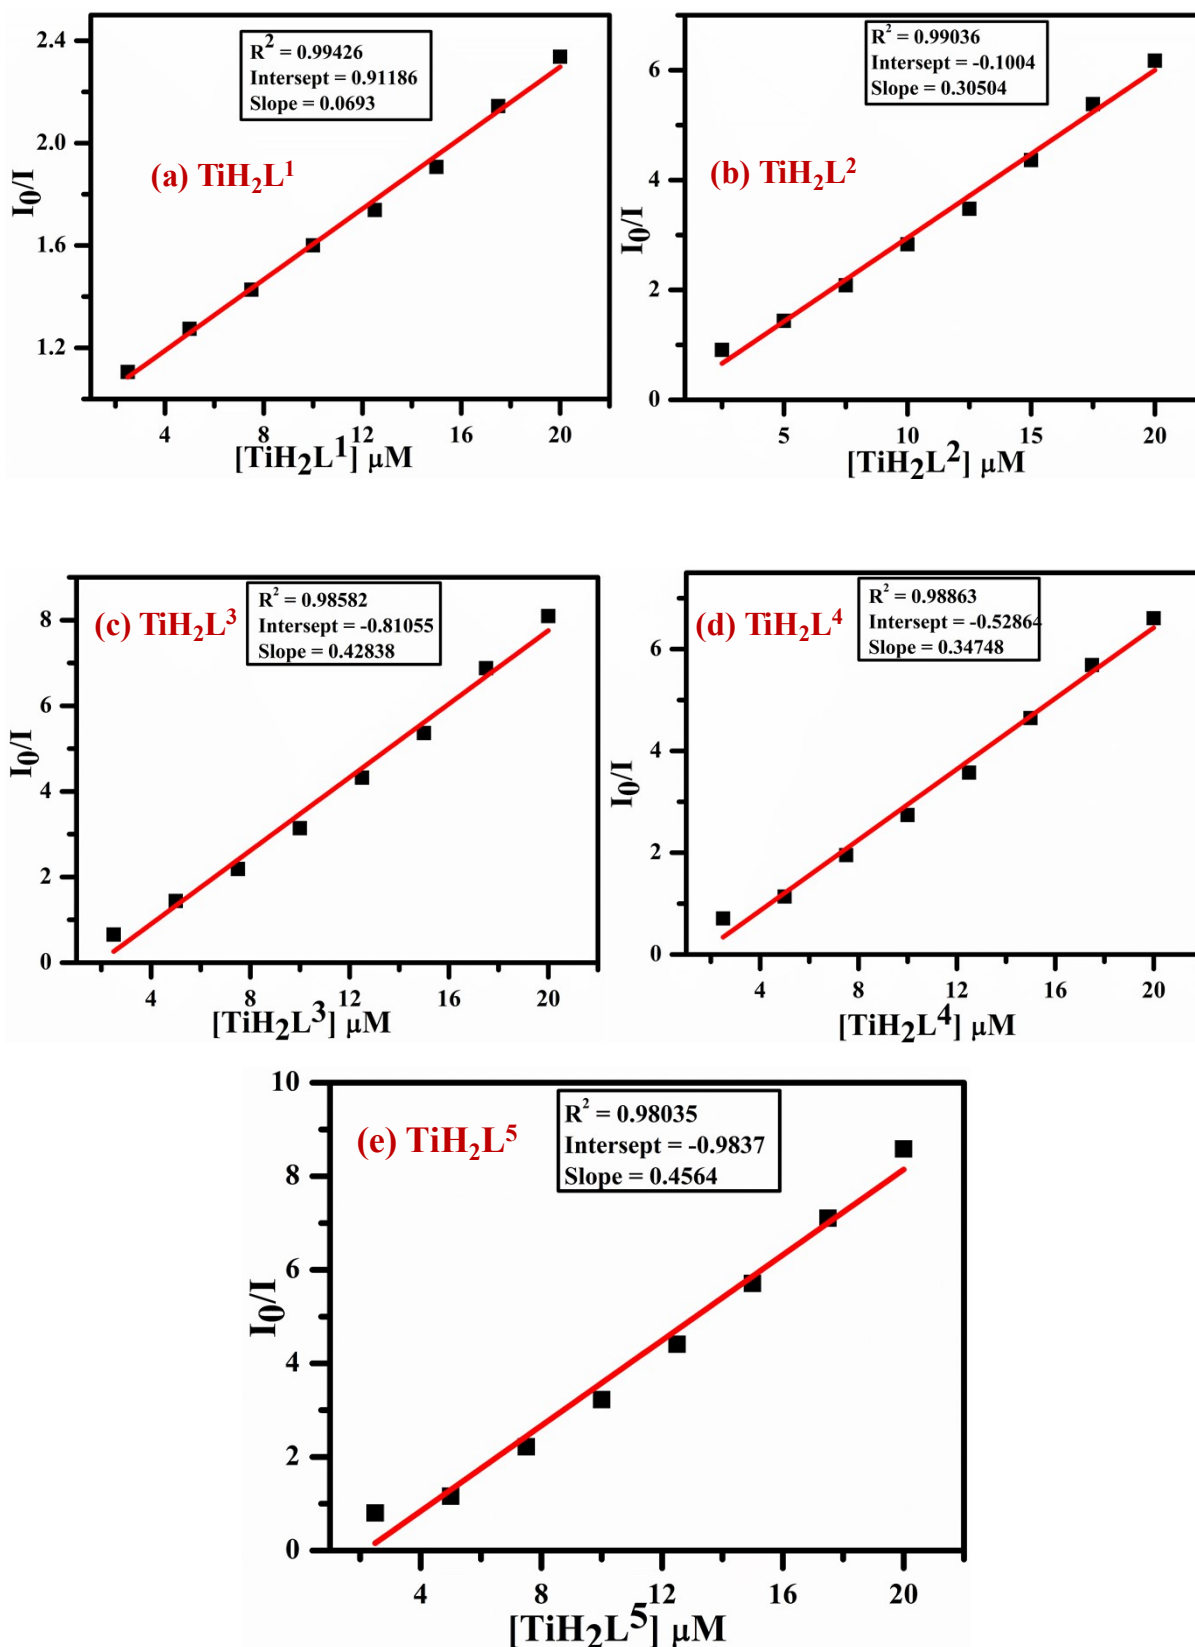

**Fig. S31** Stern-Volmer plot of  $I_0/I$  vs concentration of complexes: (a)  $\text{TiH}_2\text{L}^1$ , (b)  $\text{TiH}_2\text{L}^2$ , (c)  $\text{TiH}_2\text{L}^3$ , (d)  $\text{TiH}_2\text{L}^4$  and (e)  $\text{TiH}_2\text{L}^5$  for BSA binding

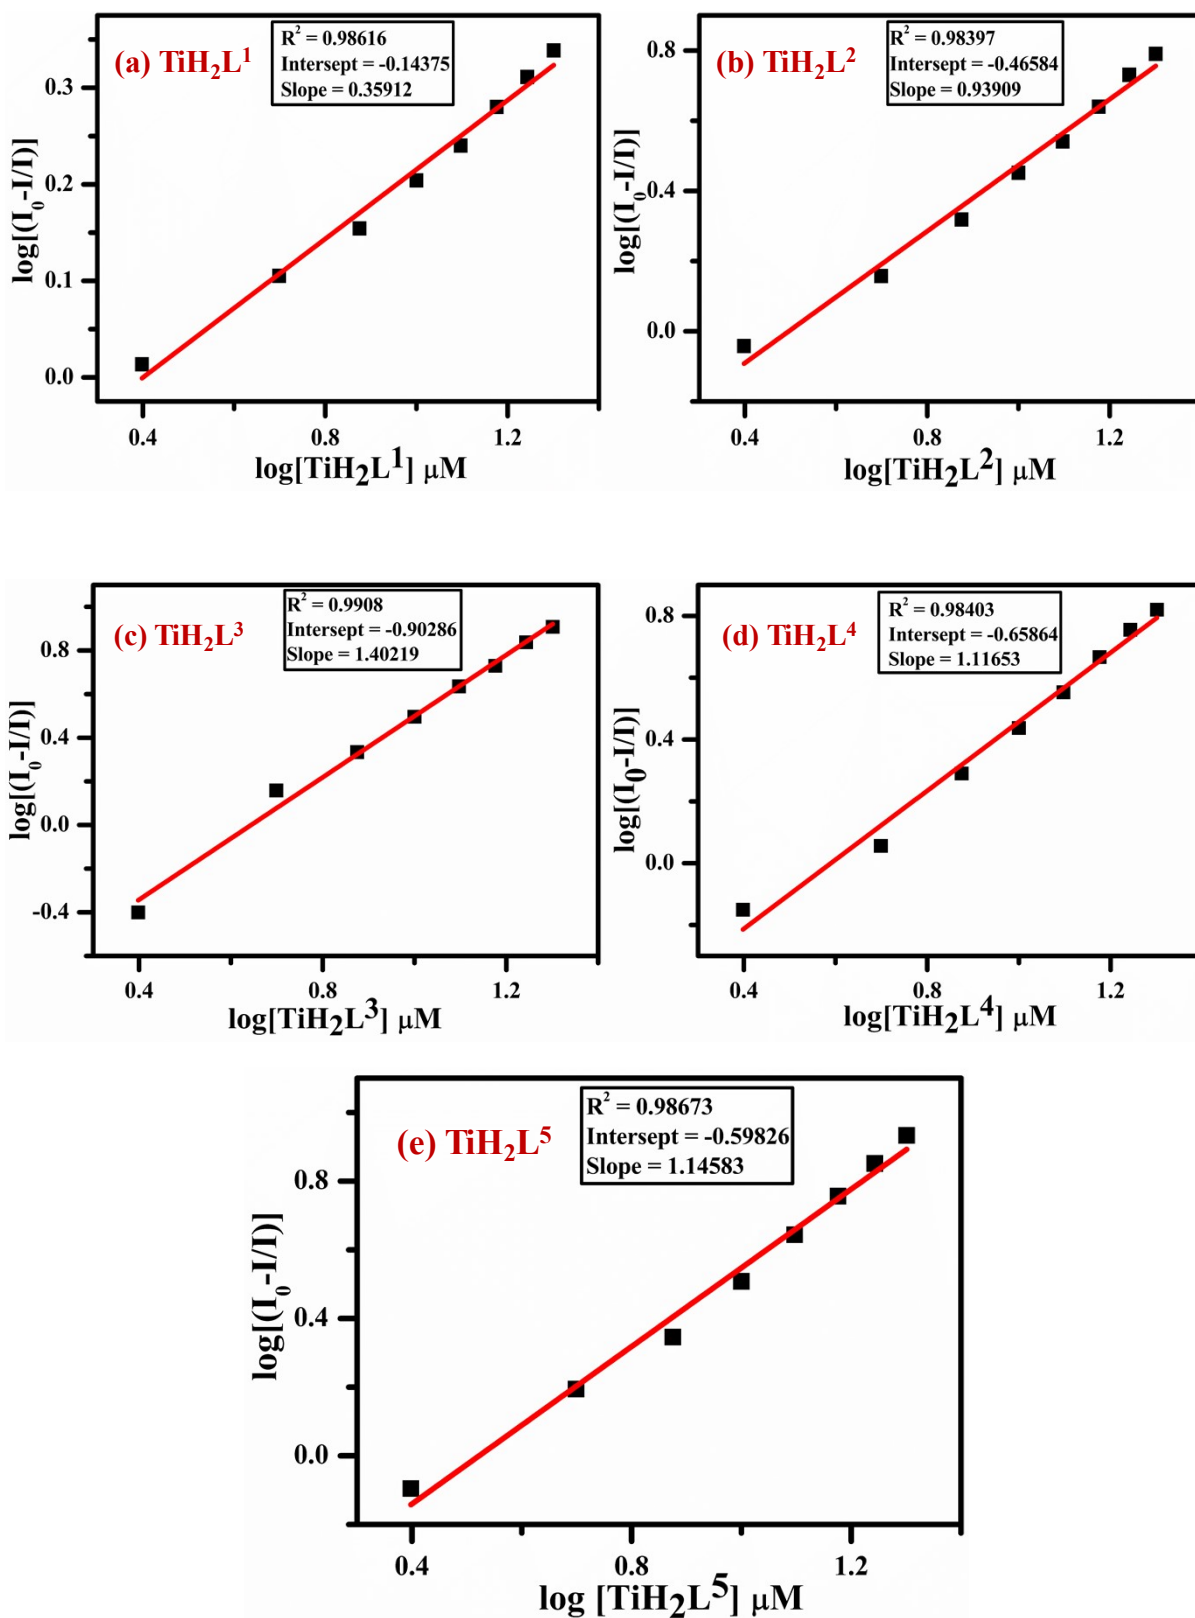

Fig. S32 Scatchard plot of  $\log[(I_0 - I)/I]$  vs  $\log[\text{Complex}]$  for BSA in the presence of titanium(IV)

derivatives: (a)  $\text{TiH}_2\text{L}^1$ , (b)  $\text{TiH}_2\text{L}^2$ , (c)  $\text{TiH}_2\text{L}^3$ , (d)  $\text{TiH}_2\text{L}^4$  and (e)  $\text{TiH}_2\text{L}^5$

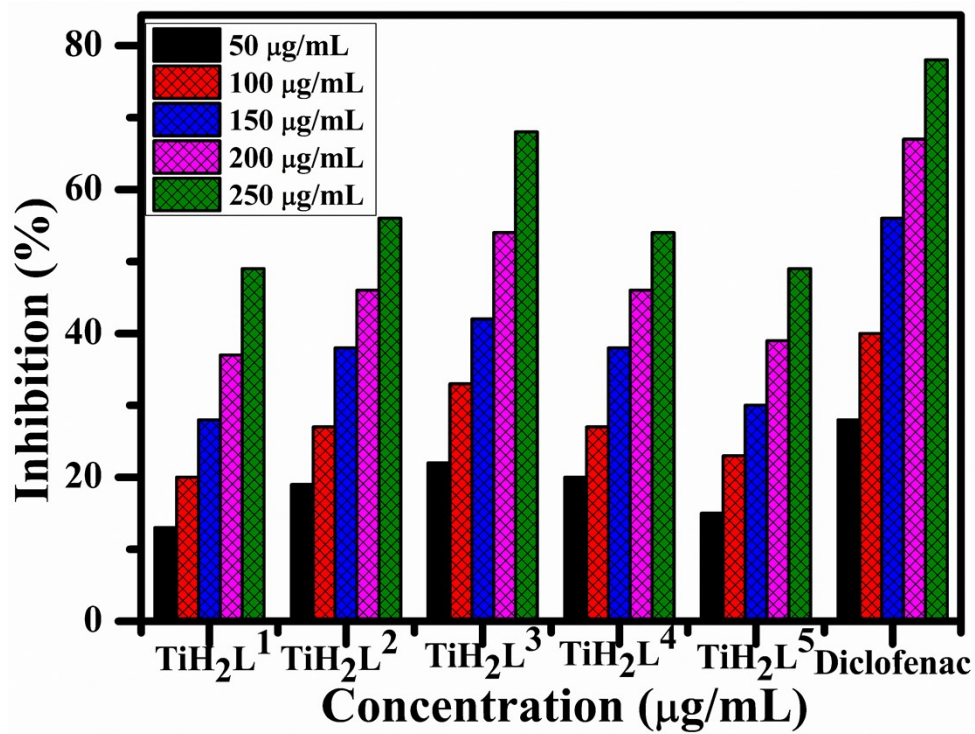

Fig. S33 Anti-inflammatory activity of TiH<sub>2</sub>L<sup>1</sup>-TiH<sub>2</sub>L<sup>5</sup>

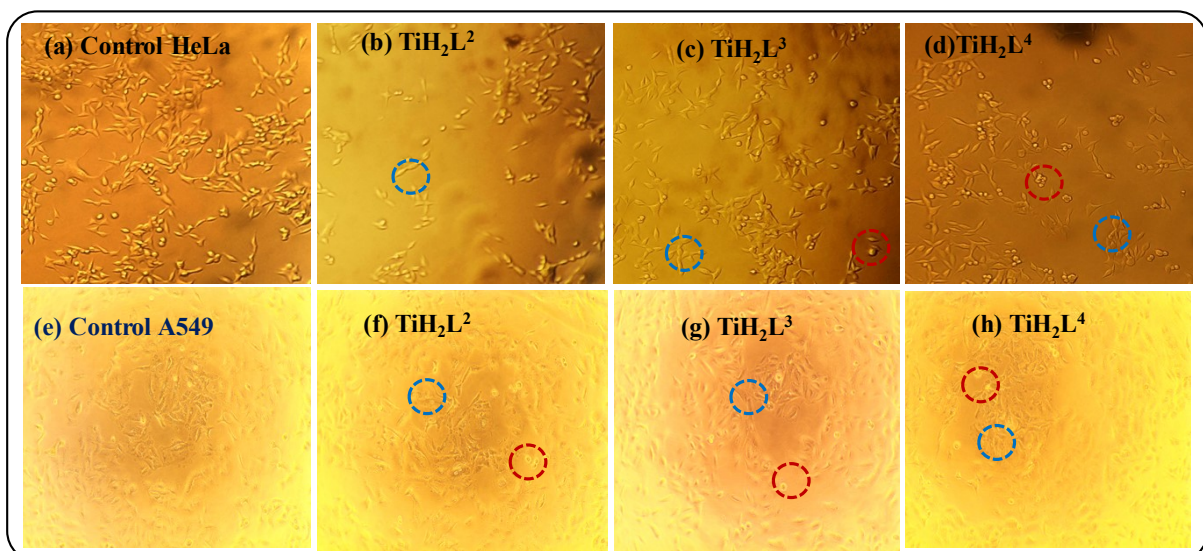

**Fig. S34** Microscopic images (a-h) of HeLa and A549 cells treated with titanium(IV) derivatives (TiH<sub>2</sub>L<sup>2</sup>-TiH<sub>2</sub>L<sup>4</sup>) in 100 µg/mL concentration (dead cells are revealed as red circles and live cells are demonstrated as blue circles)

**Table S1** FTIR spectral data (cm<sup>-1</sup>) of TiH<sub>2</sub>L<sup>1</sup>-TiH<sub>2</sub>L<sup>5</sup>

| Complexes                       | $\nu(\text{C-H})$ | $\nu(\text{C=N})$ | $\nu(\text{C=C})$ | $\nu(\text{N=N})$ | $\nu(\text{C-N})$ | $\nu(\text{C-O})$ | $\nu(\text{C-X})$ | $\nu(\text{Ti-N})$ | $\nu(\text{Ti-O})$ |
|---------------------------------|-------------------|-------------------|-------------------|-------------------|-------------------|-------------------|-------------------|--------------------|--------------------|
| TiH <sub>2</sub> L <sup>1</sup> | 3058              | 1603              | 1530              | 1452              | 1292,<br>1107     | 1258,<br>1027     | -                 | 535                | 493                |
| TiH <sub>2</sub> L <sup>2</sup> | 3071              | 1602              | 1532              | 1467              | 1294,<br>1110     | 1229,<br>1030     | 735               | 537                | 474                |
| TiH <sub>2</sub> L <sup>3</sup> | 3049              | 1601              | 1530              | 1458              | 1291,<br>1113     | 1256,<br>1083     | 737               | 544                | 445                |
| TiH <sub>2</sub> L <sup>4</sup> | 3042              | 1602              | 1524              | 1470              | 1294,<br>1148     | 1250,<br>1018     | 743               | 546                | 457                |
| TiH <sub>2</sub> L <sup>5</sup> | 3061              | 1603              | 1520              | 1458              | 1293,<br>1103     | 1251,<br>1022     | 736               | 533                | 432                |

**Table S2** Calculated molecular electronic parameters of ligands (H<sub>2</sub>L<sup>1</sup>-H<sub>2</sub>L<sup>5</sup>) and titanium(IV) derivatives (TiH<sub>2</sub>L<sup>1</sup>-TiH<sub>2</sub>L<sup>5</sup>)

| S.No | Code                            | Energy (Kcal/mol) | DM (Debye) | HOMO (eV) | LUMO (eV) | Gap (eV) | $\chi$ (eV) | $\mu$ (eV) | $\eta$ (eV) | S (eV) | $\omega$ (eV) |
|------|---------------------------------|-------------------|------------|-----------|-----------|----------|-------------|------------|-------------|--------|---------------|
| 1    | H <sub>2</sub> L <sup>1</sup>   | -2814653.01       | 2.31       | -5.71     | -2.70     | -3.01    | 4.20        | -4.20      | -1.50       | -0.75  | -13.29        |
| 2    | H <sub>2</sub> L <sup>2</sup>   | -2742609.72       | 3.77       | -5.70     | -2.70     | -3.00    | 4.20        | -4.20      | -1.50       | -0.75  | -13.24        |
| 3    | H <sub>2</sub> L <sup>3</sup>   | -2742609.40       | 4.97       | -5.72     | -2.79     | -2.94    | 4.25        | -4.25      | -1.47       | -0.73  | -13.28        |
| 4    | H <sub>2</sub> L <sup>4</sup>   | -3007380.34       | 4.81       | -5.72     | -2.79     | -2.93    | 4.26        | -4.26      | -1.47       | -0.73  | -13.27        |
| 5    | H <sub>2</sub> L <sup>5</sup>   | -2789998.87       | 10.24      | -5.77     | -3.24     | -2.54    | 4.50        | -4.50      | -1.27       | -0.63  | -12.87        |
| 6    | TiH <sub>2</sub> L <sup>1</sup> | -2789998.87       | 3.48       | -5.74     | -3.07     | -2.67    | 4.41        | -4.41      | -1.33       | -0.67  | -12.95        |
| 7    | TiH <sub>2</sub> L <sup>2</sup> | -2789998.87       | 2.53       | -5.75     | -3.09     | -2.65    | 4.42        | -4.42      | -1.33       | -0.66  | -12.95        |
| 8    | TiH <sub>2</sub> L <sup>3</sup> | -2789998.87       | 1.58       | -5.75     | -3.15     | -2.60    | 4.45        | -4.45      | -1.30       | -0.65  | -12.86        |
| 9    | TiH <sub>2</sub> L <sup>4</sup> | -2789998.87       | 1.75       | -5.73     | -3.14     | -2.60    | 4.44        | -4.44      | -1.30       | -0.65  | -12.77        |
| 10   | TiH <sub>2</sub> L <sup>5</sup> | -2789998.87       | 4.73       | -5.78     | -3.40     | -2.38    | 4.59        | -4.59      | -1.19       | -0.60  | -12.57        |

\*Dipole moment (DM), Energy of HOMO (EH), energy of LUMO (EL), energy band gap ( $\Delta E$ ), electronegativity ( $\chi$ ), global hardness ( $\eta$ ), chemical potential ( $\mu$ ), global electrophilicity index ( $\omega$ ) and global softness (S)

**Table S3** Optimized bond length (Å) of the Ti(IV) complexes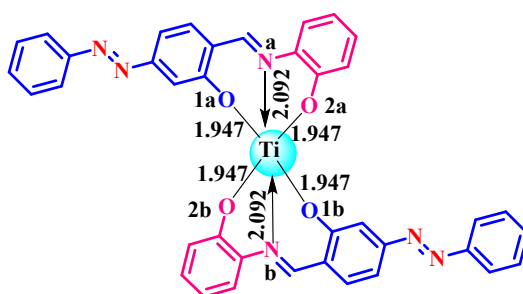

| Complex                         | O <sub>1a</sub> ---Ti | O <sub>2a</sub> ---Ti | N <sub>a</sub> ---Ti | O <sub>1b</sub> ---Ti | O <sub>2b</sub> ---Ti | N <sub>b</sub> ---Ti |
|---------------------------------|-----------------------|-----------------------|----------------------|-----------------------|-----------------------|----------------------|
| TiH <sub>2</sub> L <sup>1</sup> | 1.947                 | 1.947                 | 2.092                | 1.947                 | 1.947                 | 2.092                |
| TiH <sub>2</sub> L <sup>2</sup> | 1.952                 | 1.954                 | 2.071                | 1.950                 | 1.957                 | 2.069                |
| TiH <sub>2</sub> L <sup>3</sup> | 1.947                 | 1.946                 | 2.088                | 1.947                 | 1.949                 | 2.087                |
| TiH <sub>2</sub> L <sup>4</sup> | 1.948                 | 1.951                 | 2.087                | 1.945                 | 1.938                 | 2.093                |
| TiH <sub>2</sub> L <sup>5</sup> | 1.917                 | 1.901                 | 2.148                | 1.915                 | 1.904                 | 2.143                |

**Table S4** Optimized bond angle (°) of the Ti(IV) derivatives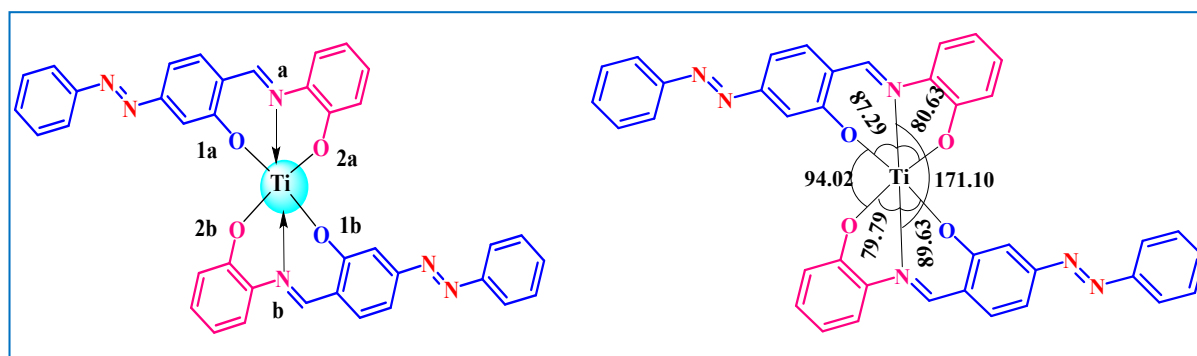

| Complexes                       | O <sub>1a</sub> --Ti--N <sub>a</sub> | O <sub>2a</sub> --Ti--N <sub>a</sub> | O <sub>1b</sub> --Ti--N <sub>b</sub> | O <sub>2b</sub> --Ti--N <sub>b</sub> | N <sub>a</sub> --Ti--N <sub>b</sub> | O <sub>1a</sub> --Ti--O <sub>2b</sub> | O <sub>2a</sub> --Ti--O <sub>1b</sub> |
|---------------------------------|--------------------------------------|--------------------------------------|--------------------------------------|--------------------------------------|-------------------------------------|---------------------------------------|---------------------------------------|
| TiH <sub>2</sub> L <sup>1</sup> | 87.29544                             | 80.6322                              | 89.60377                             | 79.79954                             | 171.10044                           | 94.02455                              | 87.08391                              |
| TiH <sub>2</sub> L <sup>2</sup> | 90.11607                             | 80.39257                             | 87.97321                             | 81.02968                             | 171.75382                           | 94.38754                              | 86.3268                               |
| TiH <sub>2</sub> L <sup>3</sup> | 87.14825                             | 79.73369                             | 89.2433                              | 80.38327                             | 171.41851                           | 94.00725                              | 87.12916                              |
| TiH <sub>2</sub> L <sup>4</sup> | 89.37351                             | 80.02806                             | 87.61594                             | 80.69729                             | 172.70979                           | 93.83275                              | 86.94033                              |
| TiH <sub>2</sub> L <sup>5</sup> | 85.85722                             | 77.54227                             | 85.30993                             | 77.78306                             | 171.11759                           | 95.67048                              | 88.58993                              |

**Table S5** Chemical shifts (ppm): protons of the  $\text{TiH}_2\text{L}^3$  and CT-DNA bound with  $\text{TiH}_2\text{L}^3$  in the system

| System                           | Ha    | Hb                                        | Hc    | Hd    |
|----------------------------------|-------|-------------------------------------------|-------|-------|
| $\text{TiH}_2\text{L}^3$         | 9.694 | 7.774-7.849<br>(multiple splitting peaks) | 7.106 | 6.874 |
|                                  |       |                                           | 7.125 | 6.904 |
|                                  |       |                                           | 7.144 | 6.923 |
| CT-DNA- $\text{TiH}_2\text{L}^3$ | 9.699 | 7.778-7.853<br>(multiple splitting peaks) | 7.110 | 6.877 |
|                                  |       |                                           | 7.129 | 6.907 |
|                                  |       |                                           | 7.147 | 6.927 |

**Table S6** Molecular docking studies of titanium(IV) derivatives ( $\text{TiH}_2\text{L}^1$ - $\text{TiH}_2\text{L}^5$ ) with DNA and BSA

| Ligand                   | Binding free energy<br>( $\Delta G_{\text{binding}}^\alpha$ ) | Vdw_hb_desolv energy<br>( $\Delta G_{\text{vdW+hb+desolv}}$ ) | Electrostatic energy<br>( $\Delta G_{\text{elec}}$ ) | Total internal energy<br>( $\Delta G_{\text{total}}$ ) | Torsional free energy<br>( $\Delta G_{\text{tor}}$ ) | Unbound system's energy<br>( $\Delta G_{\text{unb}}$ ) |
|--------------------------|---------------------------------------------------------------|---------------------------------------------------------------|------------------------------------------------------|--------------------------------------------------------|------------------------------------------------------|--------------------------------------------------------|
| <b>DNA</b>               |                                                               |                                                               |                                                      |                                                        |                                                      |                                                        |
| $\text{TiH}_2\text{L}^1$ | -8.68                                                         | -9.8                                                          | -0.07                                                | -0.42                                                  | 1.19                                                 | -0.42                                                  |
| $\text{TiH}_2\text{L}^2$ | -8.57                                                         | -9.65                                                         | -0.11                                                | 0.17                                                   | 1.19                                                 | 0.17                                                   |
| $\text{TiH}_2\text{L}^3$ | -9.54                                                         | -10.71                                                        | -0.02                                                | -0.44                                                  | 1.19                                                 | -0.44                                                  |
| $\text{TiH}_2\text{L}^4$ | -10.11                                                        | -11.27                                                        | -0.03                                                | -0.65                                                  | 1.19                                                 | -0.65                                                  |
| $\text{TiH}_2\text{L}^5$ | -8.11                                                         | -11.37                                                        | 1.47                                                 | -0.53                                                  | 1.79                                                 | -0.53                                                  |
| <b>BSA</b>               |                                                               |                                                               |                                                      |                                                        |                                                      |                                                        |
| $\text{TiH}_2\text{L}^1$ | -6.26                                                         | -7.46                                                         | -0.02                                                | -0.47                                                  | 1.19                                                 | -0.47                                                  |
| $\text{TiH}_2\text{L}^2$ | -5.97                                                         | -7.19                                                         | 0.03                                                 | -0.37                                                  | 1.19                                                 | -0.37                                                  |
| $\text{TiH}_2\text{L}^3$ | -6.95                                                         | -8.06                                                         | -0.08                                                | -0.34                                                  | 1.19                                                 | -0.34                                                  |
| $\text{TiH}_2\text{L}^4$ | -7.42                                                         | -8.54                                                         | -0.07                                                | 0.17                                                   | 1.19                                                 | 0.17                                                   |
| $\text{TiH}_2\text{L}^5$ | -5.49                                                         | -7.51                                                         | 0.22                                                 | -0.56                                                  | 1.79                                                 | -0.56                                                  |

**Table S7** A glance on cytotoxicity comparison of titanium(IV) derivatives

| S.No | Hexacoordinated Titanium(IV) derivatives                                                                                                              | Cell lines                                                 | IC <sub>50</sub> Values          | Reference |
|------|-------------------------------------------------------------------------------------------------------------------------------------------------------|------------------------------------------------------------|----------------------------------|-----------|
| 1    | Hetero-bis-chelate stabilization of salan (ONNO) and thiosalan (OSSO) with with 2,6-pyridinedicarboxylic acid (dipic) supported titanium(IV)alkoxides | HeLa S3<br>Hep G2                                          | 4.5 ± 0.5 (μM)<br>3.2 ± 0.6 (μM) | [16]      |
| 2    | Homoleptic Ti(IV) compounds of dianionic tridentate Schiff base ligands                                                                               | ovarian carcinoma A2780<br>colorectal adenocarcinoma HT-29 | 30 ± 8 (μM)<br>60 ± 10 (μM)      | [17]      |

|   |                                                                                                    |                                                      |                                                                                                                                                                                                                                                                                                            |                     |
|---|----------------------------------------------------------------------------------------------------|------------------------------------------------------|------------------------------------------------------------------------------------------------------------------------------------------------------------------------------------------------------------------------------------------------------------------------------------------------------------|---------------------|
| 3 | Salan–titanium(IV) complexes                                                                       | A2780<br>A2780CisR                                   | 10.3± 0.2; 83 (µM)<br>7.5±0.2; 88 (µM)                                                                                                                                                                                                                                                                     | [18]                |
| 4 | Diamine bis(phenolate) titanium(IV) complexes                                                      | HeLa<br>MDA-MB-361<br>K562                           | 4.4 ± 0.3 (µM)<br>13.0 ± 1.7 (µM)<br>5.7 ± 0.3 (µM)                                                                                                                                                                                                                                                        | [19]                |
| 5 | Ti(IV) complexes of hexacoordinate diaminobis(phenolato)-bis(alkoxo) ligands                       | HeLa<br>colon HT-29<br>A2780                         | 48 ± 2 (µM)<br>38 ± 8 (µM)<br>19 ± 7 (µM)                                                                                                                                                                                                                                                                  | [20]                |
| 6 | Titanium(IV) complexes based on [ONON] diaminobis(phenolato) ligands                               | ovarian A2780<br>colon HT-29                         | 7.4 ± 1.5 (µM)<br>26.9 ± 6.2 (µM)                                                                                                                                                                                                                                                                          | [21]                |
| 7 | Budotitane based Ti(IV) derivatives                                                                | HeLa<br>C6 (glioma)<br>CHO (Chinese hamster ovarian) | 10.32 (µM)<br>20.68 (µM)<br>48.38 (µM)                                                                                                                                                                                                                                                                     | [22]                |
| 8 | <b>Bioactive O<sup>N</sup>O<sup>A</sup> Schiff base appended homoleptic titanium(IV) complexes</b> | <b>HeLa<br/>A549(Lung cancer cell line)</b>          | <b>14.7 (µg)<br/>32.9 (µg)</b><br>Five new Ti(IV) derivatives have been synthesised and subjected for binding studies with BSA and CT-DNA. Binding interactions are described with Molecular Docking, UV-Vis, FL, CD spectra analysis and geometries of Ti(IV) complexes are well established by DFT study | <b>Present work</b> |

## Experimental procedures

### Stability study

The stability of five newly synthesised titanium(IV) (**TiH<sub>2</sub>L<sup>1</sup>-TiH<sub>2</sub>L<sup>5</sup>**) complexes were verified in 10% DMSO medium and water medium over time period of 0<sup>th</sup>, 24<sup>th</sup> and 48<sup>th</sup> hr and aqueous GSH (1mM) medium time period of 0<sup>th</sup>, 12<sup>th</sup>, 24<sup>th</sup> and 48<sup>th</sup> hr by UV-Visible method.<sup>1,2</sup>

### **n-Octanol-water partition coefficient (log P<sub>o/w</sub>):**

The log P<sub>o/w</sub> of titanium(IV) derivatives (**TiH<sub>2</sub>L<sup>1</sup>-TiH<sub>2</sub>L<sup>5</sup>**) were determined through shake flask method subjecting the previously published procedure.<sup>3,4</sup> On an orbital shaker, known volume of each complexes were suspended in water that had been pre-saturated with n-octanol shaken for 24 hr. Kept aside for the phase separation followed by centrifuged for 10 min at 3000 rpm. The separation of the two layers was followed by a UV-Vis spectroscopic investigation for both water and octanol layer. The OD of the complex in water and octanol has been employed for determining the log P<sub>o/w</sub> values (partition coefficient).

### **Conductivity measurement:**

The molar conductivity of the titanium(IV) complexes (**TiH<sub>2</sub>L<sup>1</sup>-TiH<sub>2</sub>L<sup>5</sup>**) were assessed in DMSO, 10% and GSH medium with the help of conductivity-TDS meter 307 (Systronics, India) instrument and cell constant 1.0 cm<sup>-2</sup> due to the confirming the interaction of the complexes with DMSO, aqueous DMSO, GSH and Ct-DNA solutions. Concentration for this conductivity experiment we used the complex concentration was 3 × 10<sup>-1</sup> M.<sup>5,6</sup>

$$\Lambda M = k - 1000/C \dots\dots\dots 1$$

Where, K= specific conductivity and C= concentration of solute.

### **Viscosity measurement**

Viscosity investigation has been carried for to find out the mode of binding interaction of titanium(IV) complexes (**TiH<sub>2</sub>L<sup>1</sup>-TiH<sub>2</sub>L<sup>5</sup>**) with CT-DNA using Ostwald's capillary viscometer.<sup>7-9</sup> The average flow time was recorded after each experiment had been conducted in three times. The data was plotted as (η/η<sub>0</sub>)<sup>1/3</sup> vs [complex]/[DNA], where η and η<sub>0</sub> reveals to viscosity of DNA in the presence and absence of the complexes, respectively.

### **Molecular docking**

The synthesized complexes **TiH<sub>2</sub>L<sup>1</sup>-TiH<sub>2</sub>L<sup>5</sup>** were exposed to a molecular docking study using Autodock 4.2, covering the Lamarckian Genetic Algorithm (LGA) to calculate binding affinities of several conformers and AutoDock Tools (ADT) to implement the operation and consequent calculations. The crystallographic structure of DNA with the sequence d(CpGpCpGpApApTpTpCpGpCpG) (PDB ID: 1BNA)<sup>10</sup> and crystallographic structure of BSA (PDB



ID: 4F5S)<sup>11</sup> fetched from the protein data bank with a resolution of 1.90 Å was built using Autodock 4.2 package to establish BSA and DNA-binding properties of **TiH<sub>2</sub>L<sup>1</sup>-TiH<sub>2</sub>L<sup>5</sup>**. In order to prevent an undesirable contact with the docked conformers, water molecules were additionally omitted throughout the protein preparation process.

The 3D structures of complexes **TiH<sub>2</sub>L<sup>1</sup>-TiH<sub>2</sub>L<sup>5</sup>** derived from DFT optimized geometry were transformed into PDB form through Gauss view. Each atom in both the target and lead compound was fed with Gasteiger charges. Before docking, the binding site was assigned in developing a grid box with spacing of 0.7 Å and 40 × 40 × 40 number of points in x, y and z directions. In the case of BSA, the grid size was considered 40 × 40 × 40 number of points in x, y and z with a spacing of 1 Å encircling all the putative active site residues of BSA (Trp213 and Trp134). The working principle and the output parameters were similar to the above-mentioned DNA docking. Imaging of the docked pose has been done *via* LIGPLOT and PyMol molecular visuals programs.

### **Anti-inflammatory activities**

Anti-inflammatory potential of the synthesized derivatives **TiH<sub>2</sub>L<sup>1</sup>-TiH<sub>2</sub>L<sup>5</sup>** were deliberately employed by BSA denaturation technique.<sup>12</sup> The dosages of the drugs and the reference medication *i. e.* diclofenac sodium was taken in varied concentrations such as 50, 100, 150, 200 and 250 µg/mL. The test samples were dissolved in DMSO wherein phosphate buffer and BSA (3 µg/mL) were added as 1 mL each. The final constituents of five test samples were incubated at 37 °C for 15 mins, afterwards, denaturized for 15 minutes at 70 °C on water bath, later cooled and were subjected to measure their absorbance at 660 nm. The identical test solutions were employed for the negative control in absence of medication. Inhibition percentages were computed as the formula provided below (equation7):

$$\text{BSA denatures inhibition by percentage} = 100 \times (A_t - A_c) / A_t \dots\dots\dots (7)$$

where, A<sub>c</sub> and A<sub>t</sub> were optical density of control and test solutions, respectively.

### **Extension of cytotoxicity by MTT assay**

Investigation on *in vitro* anti-proliferative activities of **TiH<sub>2</sub>L<sup>1</sup>-TiH<sub>2</sub>L<sup>5</sup>** were carried out by employing MTT [{3-(4, 5-dimethylthiazolyl-2)-2, 5-diphenyltetrazolium bromide}] assay.<sup>13,14</sup> The 10,000 cells were placed into 96 well microplates with 100 µL of cell suspensions per well

followed by incubation to promote cell adhesion at 37 °C in presence of 5% CO<sub>2</sub>, 100% relative humidity and 95% air. Dimethyl sulfoxide solution of each test samples with five varied concentrations were added appropriately into the wells that contain 100 μL of medium containing the cells to acquire the final concentration of the test samples. Further, samples loaded microplate was incubated for 24 hr at 37 °C as per aforementioned conditions.

Afterwards, the medium of test wells was evacuated by the addition of 15 μL of MTT (0.5 mg/mL) reagent into all the corresponding wells and these reacting plates were incubated for 4 hr at 37 °C in a CO<sub>2</sub> incubator. Eventually, the media of MTT microplates were discarded and 200 μL of PBS was cast-off to wash the cells. Only living cells were capable of absorbing MTT, consequently, getting transformed into formazan crystals. The MTT with media was removed and the appeared formazan crystals were dissolved in 100 μL of DMSO and the absorbance at 570 nm was measured using a microplate scanner. Three micro wells were kept for all concentrations without addition of titanium(IV) complexes served as the controls. In order to determine the percentage of inhibited cells, equation (8) could be used as mentioned below:

$$\% \text{ Inhibition of cells} = \frac{OD \text{ of test samples}}{OD \text{ of control cells}} \times 100 \dots\dots\dots (8)$$

### **Fluorescent imaging of HeLa cells**

After getting appreciable results for complex **TiH<sub>2</sub>L<sup>3</sup>** from MTT assay on HeLa and A549 cells, that is suitable for cellular uptake study against on HeLa cells (5 x 10<sup>5</sup> cells/ml) was seeded into the 24 well tissue culture plate and was treated with 14.7 μg/ml of test sample in a serum free DMEM medium (Dulbecco's Modified Eagle's Medium). The plate was incubated at 37 °C for 24 hr in 5% CO<sub>2</sub> incubator. After incubation, wells are washed thrice with PBS buffer followed by 50 μl of 1 mg/ml acridine orange and ethidium bromide were added into the appropriate wells and mixed gently. Finally, the test sample was centrifuged at 2000 rpm for 5 mins and was transferred into clean glass slide protected with cover glass and was evaluated directly within an hour and surveyed minimum 100 cells by fluorescence microscope.

### **Cell cycle analysis by employing flow cytometry**

A flow cytometry instrument (CytoFLEX, Beckman Coulter, USA) was employed to compute the fraction of cells in every phase of the cell cycle.<sup>15</sup> The HeLa cells (1×10<sup>6</sup> cells/well) were

seeded into 6 well plates followed by incubation for 8 hr before being treated with the optimal doses ( $IC_{50}$ ) of the drugs **TiH<sub>2</sub>L<sup>2</sup>** (28.8  $\mu\text{g}/\text{mL}$ ), **TiH<sub>2</sub>L<sup>3</sup>** (14.7  $\mu\text{g}/\text{mL}$ ) and **TiH<sub>2</sub>L<sup>4</sup>** (31.2  $\mu\text{g}/\text{mL}$ ). Afterwards, the cells were trypsinized and washed with PBS, consequently, fixed with 70% ethanol and preserved at -20 °C for overnight. The overnight fixation was followed by centrifugation for 10 mins at 4000-5000 rpm. The obtained pellets were suspended in RNase containing PBS with 20  $\mu\text{g}/\text{mL}$  of propidium iodide (PI) and incubated for 10 mins in the dark. The above PI stained samples were read at 488 nm in the flow cytometry.

### **ROS quantification by DCFH-DA staining assay**

The cells were seeded in a six-well plate and were treated with the  $IC_{50}$  concentrations of each of the compounds **TiH<sub>2</sub>L<sup>2</sup>** (28.8  $\mu\text{g}/\text{mL}$ ), **TiH<sub>2</sub>L<sup>3</sup>** (14.7  $\mu\text{g}/\text{mL}$ ) and **TiH<sub>2</sub>L<sup>4</sup>** (31.2  $\mu\text{g}/\text{mL}$ ). The test wells were trypsinized and washed after the 8 hr incubation. Subsequently, the cells were subjected for 20  $\mu\text{M}$  DCFH-DA (Dichloro-dihydro-fluorescein diacetate) treatment at 37 °C for 30 mins in complete darkness.<sup>1,15</sup> The ROS levels were measured using flow cytometry (CytoFLEX, Beckman Coulter, USA).

### **Annexin V-APC/PI for apoptosis detection**

Annexin V-APC/PI apoptosis detection assay (Elabscience) was used to assess the cell apoptosis. The HeLa cells were treated with  $IC_{50}$  doses of corresponding drugs **TiH<sub>2</sub>L<sup>2</sup>** (28.8  $\mu\text{g}/\text{mL}$ ), **TiH<sub>2</sub>L<sup>3</sup>** (14.7  $\mu\text{g}/\text{mL}$ ) and **TiH<sub>2</sub>L<sup>4</sup>** (31.2  $\mu\text{g}/\text{mL}$ ) at 37 °C for 8 hr. As per the procedure of manufacturer, the cells were trypsinized and washed twice with PBS followed by resuspension in 1X Annexin V binding buffer.<sup>1,15</sup> Annexin V antibody labelled with APC and PI were added and incubated at 37 °C for 10 mins. The samples were read in flow cytometer (CytoFLEX, Beckman Coulter, USA), the fluorescence was measured at respective channels - PI (488 nm) and Annexin V (APC 633 nm) to study the apoptosis inducing effect of **TiH<sub>2</sub>L<sup>2</sup>**-**TiH<sub>2</sub>L<sup>4</sup>**.

### **References**

1. N. Roy, U. Sen, Y. Madaan, V. Muthukumar, S. Varddhan, S.K. Sahoo, D. Panda, B. Bose, P. Paira, Mitochondria-targeting click-derived pyridinyltriazolylmethylquinoxaline-based Y-shaped binuclear luminescent ruthenium (II) and iridium (III) complexes as cancer theranostic agents, *Inorg. Chem.*, 2020, **59**, 17689-17711.

2. A. Mondal, U. Sen, N. Roy, V. Muthukumar, S.K. Sahoo, B. Bose, P. Paira, DNA targeting half sandwich Ru (II)-p-cymene-N<sup>^</sup> N complexes as cancer cell imaging and terminating agents: Influence of regioisomers in cytotoxicity, *Dalton Transactions.*, 2021, **50**, 979-997.
3. U. Das, S. Shanavas, A.H. Nagendra, B. Kar, N. Roy, S. Vardhan, S.H. Sahoo, D. Panda, B. Bose, P. Paira, Luminescent 11-{Naphthalen-1-yl} dipyrido [3, 2-a: 2', 3'-c] phenazine-Based Ru (II)/Ir (III)/Re (I) Complexes for HCT-116 Colorectal Cancer Stem Cell Therapy, *ACS Appl. Bio Mater.*, 2023, **6**, 410-424.
4. N. Roy, S. Shanavas, B. Kar, L.Thilak Babu, U. Das, S. Vardhan, S.K. Sahoo, B. Bose, V. Rajagopalan, P. Paira, G2/M-Phase-Inhibitory Mitochondrial-Depolarizing Re (I)/Ru (II)/Ir (III)-2, 2'-Bipyrimidine-Based Heterobimetallic Luminescent Complexes: An Assessment of In Vitro Antiproliferative Activity and Bioimaging for Targeted Therapy toward Human TNBC Cells, *ACS omega.*, 2023, **8**, 12283-12297.
5. S.Nikolić, L. Rangasamy, N. Gligorijević, S. Arandjelović, S. Radulović, G. Gasser, S. Grgurić-Šipka, Synthesis, characterization and biological evaluation of novel Ru (II)-arene complexes containing intercalating ligands, *J. Inorg. Biochem.*, 2016, **160**, 156-165.
6. P. Selvam, S. De, P. Paira, S.K. Kumar, A. Moorthy, A. Ghosh, Y.C. Kuo, S. Banerjee, S.K. Jenifer, In vitro studies on the selective cytotoxic effect of luminescent Ru (II)-p-cymene complexes of imidazo-pyridine and imidazo quinoline ligands, *Dalton Transactions.*, 2022, **51**, 17263-17276.
7. S. Banerjee, I. Pant, I. Khan, P. Prasad, A. Hussain, P. Kondaiah, A.R. Chakravarty, Remarkable enhancement in photocytotoxicity and hydrolytic stability of curcumin on binding to an oxovanadium (IV) moiety, *Dalton Transactions.*, 2015, **44**, 4108-4122.
8. J.H. Shi, J. Chen, J. Wang, Y.Y. Zhu, Binding interaction between sorafenib and calf thymus DNA: spectroscopic methodology, viscosity measurement and molecular docking, *Spectrochim. Acta A Mol.*, 2015, **136**, 443-504.
9. S. De, B. Sarkar, G.R. Jadhav, S.K. Ramasamy, S. Banerjee, A. Moorthy, P. Paira, Experimental and theoretical study on the biomolecular interaction of novel acenaphtho quinoxaline and dipyrindophenazine analogues, *ChemistrySelect.*, 2018, **38**, 10593-10602.

10. A. Bujacz, Structures of bovine, equine and leporine serum albumin, *Acta Crystallographica Section D: Biological Crystallography.*, 2012, **68**, 1278-1289.
11. S. Yuan, H.S. Chan, Z. Hu, Using PyMOL as a platform for computational drug design, *Wiley Interdiscip. Rev. Comput. Mol. Sci.*, 2017, **7**, e1298.
12. M. Manimohan, R. Paulpandiyam, S. Pugalmani, M.A. Sithique, Biologically active Co (II), Cu (II), Zn (II) centered water soluble novel isoniazid grafted O-carboxymethyl chitosan Schiff base ligand metal complexes: Synthesis, spectral characterisation and DNA nuclease activity, *Int. J. Biol. Macromol.*, 2020, **163**, 801-816.
13. S. Thanigachalam, M. Pathak, Development of nano titania/polyvinylidene fluoride composite from new titanium (IV) derivative and its investigation on antibacterial, BSA interaction and cytotoxicity, *Mater. Today Commun.*, 2023, **35**, 105774.
14. K. Tummalapalli, C.S. Vasavi, P. Munusami, M. Pathak, M.M. Balamurali, Evaluation of DNA/Protein interactions and cytotoxic studies of copper (II) complexes incorporated with N, N donor ligands and terpyridine ligand, *Int. J. Biol. Macromol.*, 2017, **95**, V1254-1266.
15. S. Sankar, G.K. Muthukaliannan, Combinatorial effect of diclofenac with piperine and D-limonene on inducing apoptosis and cell cycle arrest of breast cancer cells, *Asian Pac. J. Trop. Biomed.*, 2023, **13**, 80-92.
16. M. Grützke, T. Zhao, T.A. Immel, T. Huhn, Heptacoordinate heteroleptic salan (ONNO) and thiosalan (OSSO) titanium (IV) complexes: investigation of stability and cytotoxicity, *Inorganic Chemistry.*, 2015, **54**, 6697-6706.
17. Z. Shpilt, R. Manne, M.A. Rohman, S. Mitra, E.R. Tiekink, T.S. Basu Baul, E.Y. Tshuva, Homoleptic Ti [ONO] 2 type complexes of amino-acid-tethered phenolato Schiff-base ligands: Synthesis, characterization, time-resolved fluorescence spectroscopy, and cytotoxicity against ovarian and colon cancer cells, *Appl. Organomet. Chem.*, 2020, **34**, e5309.
18. C.M. Manna, O. Braitbard, E. Weiss, J. Hochman, E.Y. Tshuva, Cytotoxic Salan–Titanium (IV) Complexes: High Activity Toward a Range of Sensitive and Drug-Resistant Cell Lines, and Mechanistic Insights, *ChemMedChem.*, 2012, **7**, 703-708.

19. S. Barroso, A.M. Coelho, S. Gómez-Ruiz, M.J. Calhorda, Ž. Žižak, G.N. Kaluđerović, A.M. Martins, Synthesis, cytotoxic and hydrolytic studies of titanium complexes anchored by a tripodal diamine bis (phenolate) ligand, *Dalton Trans.*, 2014, **43**, 17422-17433.
20. M. Taha, E.Y. Tshuva, Phenolato Ti (iv) hexacoordinate complexes for anticancer chemotherapy: enhancement of solubility, hydrolytic stability, and cytotoxicity, *Dalton Trans.*, 2023.
21. A. Pedko, E. Rubanovich, E.Y. Tshuva, A. Shurki, Hydrolytically Stable and Cytotoxic [ONO N] 2Ti (IV)-Type Octahedral Complexes, *Inorg. Chem.*, 2022, **61**, 17653-17661.
22. N. Kumar, R. Kaushal, A. Chaudhary, S. Arora, P. Awasthi, Titanium based mixed ligand complexes: Synthesis, spectroscopic and in vitro antiproliferative studies, *Inorg. Nano-Met. Chem.*, 2018, **48**, 467-476.
